# Supplementary material for: Synthesis and antitumor activity of novel N-substituted tetrahydro-β-carboline–imidazolium salt derivatives
Source: Royal Society of Chemistry journal article supplement (doi:10.1039/c6ob01495j), 2016-01-01

## Electronic supplementary information (ESI)

# Synthesis and antitumor activity of novel N-substituted tetrahydro- $\beta$ -carboline–imidazolium salt derivatives

Bei Zhou <sup>a</sup>, Zheng-Fen Liu <sup>a</sup>, Guo-Gang Deng <sup>a</sup>, Wen Chen <sup>a</sup>, Min-Yan Li <sup>c</sup>, Li-  
Juan Yang <sup>d</sup>, Yan Li <sup>b,\*</sup>, Xiao-Dong Yang <sup>a,\*</sup>, Hong-Bin Zhang<sup>a,\*</sup>

<sup>a</sup> *Key Laboratory of Medicinal Chemistry for Natural Resource (Yunnan University),  
Ministry of Education, School of Chemical Science and Technology, Yunnan  
University, Kunming, 650091, P. R. China*

<sup>b</sup> *State Key Laboratory for Phytochemistry and Plant Resources in West China,  
Kunming Institute of Botany, Chinese Academy of Science, Kunming, 650204, P. R.  
China*

<sup>c</sup> *Department of Chemistry, University of Pennsylvania, Philadelphia, Pennsylvania,  
19104-6323, United States*

<sup>d</sup> *School of Chemistry & Environment, Yunnan Minzu University, Kunming, 650500, P. R.  
China.*

## TABLE OF CONTENTS

|                                                                              |         |
|------------------------------------------------------------------------------|---------|
| 1. General Experimental.....                                                 | S2      |
| 2. Experimental Procedures and Analytical Data.....                          | S3-S35  |
| 3. Biological Assay Procedures and Results.....                              | S36-S38 |
| 4. Cell Apoptosis and Cell Cycle Analysis.....                               | S39-S41 |
| 5. <sup>1</sup> H-NMR and <sup>13</sup> C-NMR Spectral of New Compounds..... | S42-S81 |

---

\* Corresponding author. Tel.: +86-871-65031119; fax.: +86-871-65035538. E-mail: zhanghb@ynu.edu.cn, xdyang@ynu.edu.cn, liyanb@mail.kib.ac.cn

## 1. General Experimental

Melting points were obtained on a XT-4 melting-point apparatus and were uncorrected. Proton nuclear magnetic resonance ( $^1\text{H-NMR}$ ) spectra were recorded on a Bruker Avance 400 (600) spectrometer at 400 (600) MHz. Carbon-13 nuclear magnetic resonance ( $^{13}\text{C-NMR}$ ) was recorded on Bruker Avance 400 (400) spectrometer at 100 (120) MHz. Chemical shifts are reported as  $\delta$  values in parts per million (ppm) relative to tetramethylsilane (TMS) for all recorded NMR spectra. Low-resolution Mass spectra were recorded on a VG Auto Spec-3000 magnetic sector MS spectrometer. High Resolution Mass spectra were taken on AB QSTAR Pulsar mass spectrometer. Elemental analysis (%CHN) was conducted on a Vario EL III spectrometer.

Silica gel (200–300 mesh) for column chromatography and silica GF<sub>254</sub> for TLC were produced by Qingdao Marine Chemical Company (China). All air- or moisture-sensitive reactions were conducted under an argon atmosphere. Starting materials and reagents used in reactions were obtained commercially from Acros, Aldrich, Fluka and were used without purification, unless otherwise indicated.

## 2. Experimental Procedures and Analytical Data

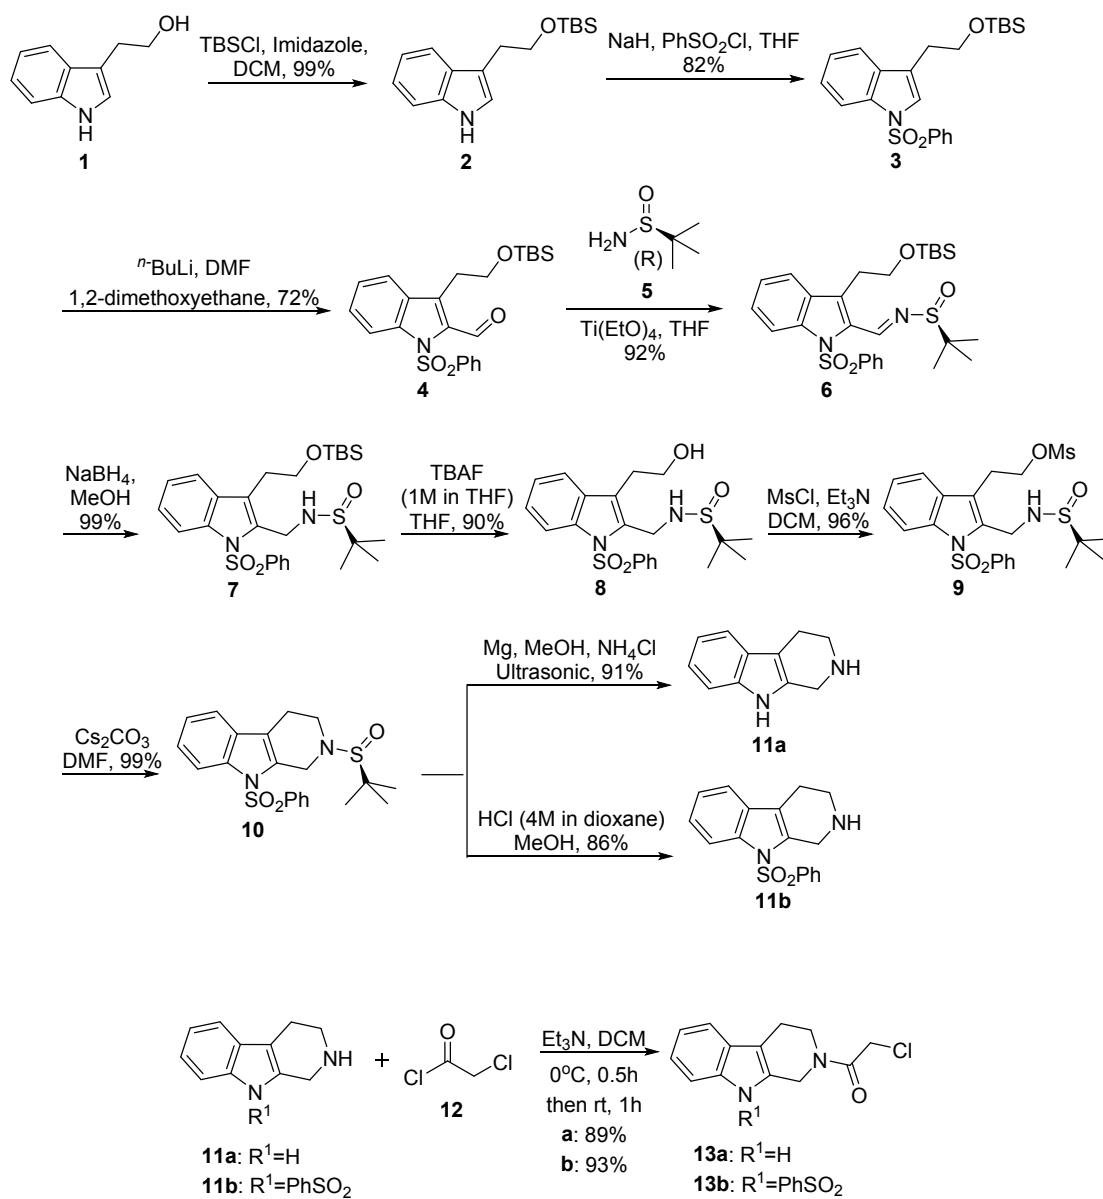

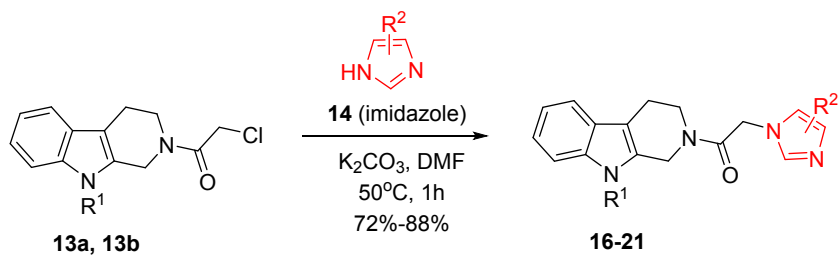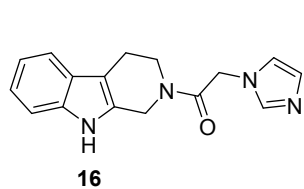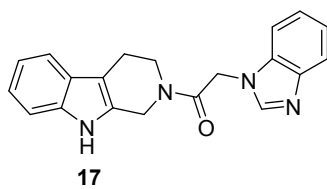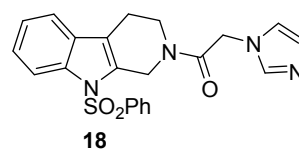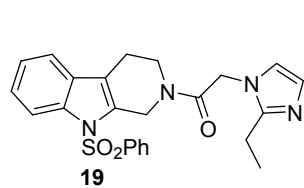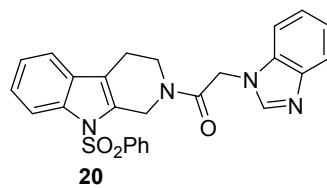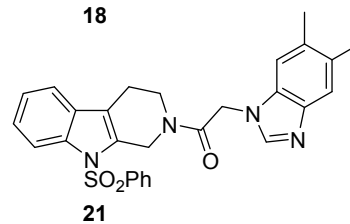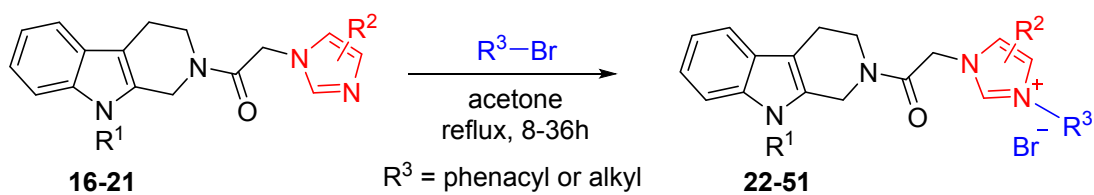

Synthesis of hybrid compounds **16-51**.

| Entry | Compound No. | R <sup>1</sup>    | Imidazole ring             | R <sup>3</sup>                 | Molecular formula                                                               | mp (°C) | Yields (%) |
|-------|--------------|-------------------|----------------------------|--------------------------------|---------------------------------------------------------------------------------|---------|------------|
| 1     | 16           | H                 | imidazole                  | –                              | C <sub>16</sub> H <sub>16</sub> N <sub>4</sub> O                                | 85-86   | 85         |
| 2     | 17           | H                 | benzimidazole              | –                              | C <sub>20</sub> H <sub>18</sub> N <sub>4</sub> O                                | 275-276 | 88         |
| 3     | 18           | PhSO <sub>2</sub> | imidazole                  | –                              | C <sub>22</sub> H <sub>20</sub> N <sub>4</sub> O <sub>3</sub> S                 | 77-79   | 82         |
| 4     | 19           | PhSO <sub>2</sub> | 2-ethyl-imidazole          | –                              | C <sub>24</sub> H <sub>24</sub> N <sub>4</sub> O <sub>3</sub> S                 | 147-148 | 88         |
| 5     | 20           | PhSO <sub>2</sub> | benzimidazole              | –                              | C <sub>26</sub> H <sub>22</sub> N <sub>4</sub> O <sub>3</sub> S                 | 139-140 | 72         |
| 6     | 21           | PhSO <sub>2</sub> | 5,6-dimethyl-benzimidazole | –                              | C <sub>28</sub> H <sub>26</sub> N <sub>4</sub> O <sub>3</sub> S                 | 278-279 | 76         |
| 7     | 22           | H                 | imidazole                  | phenacyl                       | C <sub>28</sub> H <sub>25</sub> BrN <sub>4</sub> O <sub>2</sub>                 | 201-202 | 78         |
| 8     | 23           | H                 | imidazole                  | 1-(naphthalen-2-yl)ethan-1-one | C <sub>28</sub> H <sub>25</sub> BrN <sub>4</sub> O <sub>2</sub>                 | 249-251 | 92         |
| 9     | 24           | H                 | benzimidazole              | phenacyl                       | C <sub>28</sub> H <sub>25</sub> BrN <sub>4</sub> O <sub>2</sub>                 | 236-238 | 92         |
| 10    | 25           | H                 | benzimidazole              | 4-methoxyphenacyl              | C <sub>29</sub> H <sub>27</sub> BrN <sub>4</sub> O <sub>3</sub>                 | 258-260 | 88         |
| 11    | 26           | H                 | benzimidazole              | 4-bromophenacyl                | C <sub>28</sub> H <sub>24</sub> Br <sub>2</sub> N <sub>4</sub> O <sub>2</sub>   | 240-242 | 78         |
| 12    | 27           | H                 | benzimidazole              | 1-(naphthalen-2-yl)ethan-1-one | C <sub>32</sub> H <sub>27</sub> BrN <sub>4</sub> O <sub>2</sub>                 | 270-271 | 83         |
| 13    | 28           | H                 | benzimidazole              | 4-bromobenzyl                  | C <sub>27</sub> H <sub>24</sub> Br <sub>2</sub> N <sub>4</sub> O                | 272-274 | 88         |
| 14    | 29           | H                 | benzimidazole              | 4-nitrobenzyl                  | C <sub>27</sub> H <sub>24</sub> BrN <sub>5</sub> O <sub>3</sub>                 | 279-280 | 82         |
| 15    | 30           | H                 | benzimidazole              | 3-naphthylmethyl               | C <sub>31</sub> H <sub>27</sub> BrN <sub>4</sub> O                              | 272-273 | 76         |
| 17    | 31           | PhSO <sub>2</sub> | imidazole                  | phenacyl                       | C <sub>30</sub> H <sub>27</sub> BrN <sub>4</sub> O <sub>4</sub> S               | 222-223 | 89         |
| 18    | 32           | PhSO <sub>2</sub> | imidazole                  | 1-(naphthalen-2-yl)ethan-1-one | C <sub>34</sub> H <sub>29</sub> BrN <sub>4</sub> O <sub>4</sub> S               | 195-196 | 86         |
| 29    | 33           | PhSO <sub>2</sub> | 2-ethyl-imidazole          | phenacyl                       | C <sub>32</sub> H <sub>31</sub> BrN <sub>4</sub> O <sub>4</sub> S               | 272-273 | 86         |
| 20    | 34           | PhSO <sub>2</sub> | 2-ethyl-imidazole          | 4-bromophenacyl                | C <sub>32</sub> H <sub>30</sub> Br <sub>2</sub> N <sub>4</sub> O <sub>4</sub> S | 279-280 | 89         |
| 21    | 35           | PhSO <sub>2</sub> | 2-ethyl-imidazole          | 1-(naphthalen-2-yl)ethan-1-one | C <sub>36</sub> H <sub>33</sub> BrN <sub>4</sub> O <sub>4</sub> S               | 273-274 | 78         |
| 22    | 36           | PhSO <sub>2</sub> | 2-ethyl-imidazole          | 4-methylbenzyl                 | C <sub>32</sub> H <sub>33</sub> BrN <sub>4</sub> O <sub>3</sub> S               | 244-245 | 81         |
| 23    | 37           | PhSO <sub>2</sub> | 2-ethyl-imidazole          | 3-naphthylmethyl               | C <sub>35</sub> H <sub>33</sub> BrN <sub>4</sub> O <sub>3</sub> S               | 253-254 | 87         |
| 24    | 38           | PhSO <sub>2</sub> | benzimidazole              | phenacyl                       | C <sub>34</sub> H <sub>29</sub> BrN <sub>4</sub> O <sub>4</sub> S               | 200-201 | 86         |
| 25    | 39           | PhSO <sub>2</sub> | benzimidazole              | 4-bromophenacyl                | C <sub>34</sub> H <sub>28</sub> Br <sub>2</sub> N <sub>4</sub> O <sub>4</sub> S | 197-198 | 75         |
| 26    | 40           | PhSO <sub>2</sub> | benzimidazole              | 4-methoxyphenacyl              | C <sub>35</sub> H <sub>31</sub> BrN <sub>4</sub> O <sub>5</sub> S               | 209-210 | 89         |
| 27    | 41           | PhSO <sub>2</sub> | benzimidazole              | 1-(naphthalen-2-yl)ethan-1-one | C <sub>38</sub> H <sub>31</sub> BrN <sub>4</sub> O <sub>4</sub> S               | 214-215 | 77         |
| 28    | 42           | PhSO <sub>2</sub> | benzimidazole              | 4-methylbenzyl                 | C <sub>34</sub> H <sub>31</sub> BrN <sub>4</sub> O <sub>3</sub> S               | 290-291 | 84         |
| 29    | 43           | PhSO <sub>2</sub> | benzimidazole              | 4-nitrobenzyl                  | C <sub>33</sub> H <sub>28</sub> BrN <sub>5</sub> O <sub>5</sub> S               | 272-273 | 86         |
| 30    | 44           | PhSO <sub>2</sub> | benzimidazole              | 3-naphthylmethyl               | C <sub>37</sub> H <sub>31</sub> BrN <sub>4</sub> O <sub>3</sub> S               | 136-137 | 72         |
| 31    | 45           | PhSO <sub>2</sub> | 5,6-dimethyl-benzimidazole | phenacyl                       | C <sub>36</sub> H <sub>33</sub> BrN <sub>4</sub> O <sub>4</sub> S               | 239-240 | 91         |
| 32    | 46           | PhSO <sub>2</sub> | 5,6-dimethyl-benzimidazole | 4-bromophenacyl                | C <sub>36</sub> H <sub>32</sub> Br <sub>2</sub> N <sub>4</sub> O <sub>4</sub> S | 250-252 | 88         |
| 33    | 47           | PhSO <sub>2</sub> | 5,6-dimethyl-benzimidazole | 4-methoxyphenacyl              | C <sub>37</sub> H <sub>35</sub> BrN <sub>4</sub> O <sub>5</sub> S               | 244-245 | 90         |
| 34    | 48           | PhSO <sub>2</sub> | 5,6-dimethyl-benzimidazole | 1-(naphthalen-2-yl)ethan-1-one | C <sub>40</sub> H <sub>35</sub> BrN <sub>4</sub> O <sub>4</sub> S               | 234-235 | 91         |
| 35    | 49           | PhSO <sub>2</sub> | 5,6-dimethyl-benzimidazole | 4-methylbenzyl                 | C <sub>36</sub> H <sub>35</sub> BrN <sub>4</sub> O <sub>3</sub> S               | 270-271 | 79         |
| 36    | 50           | PhSO <sub>2</sub> | 5,6-dimethyl-benzimidazole | 4-nitrobenzyl                  | C <sub>35</sub> H <sub>32</sub> BrN <sub>5</sub> O <sub>5</sub> S               | 227-228 | 89         |
| 37    | 51           | PhSO <sub>2</sub> | 5,6-dimethyl-benzimidazole | 3-naphthylmethyl               | C <sub>39</sub> H <sub>35</sub> BrN <sub>4</sub> O <sub>3</sub> S               | 252-254 | 82         |

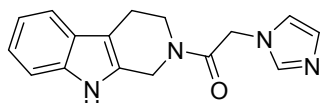

16

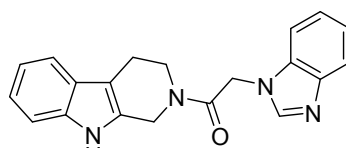

17

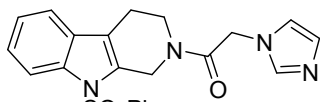

18

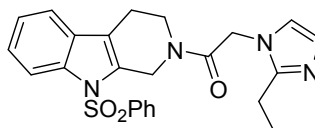

19

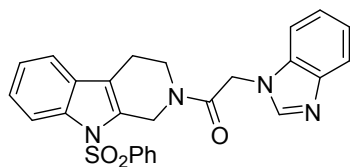

20

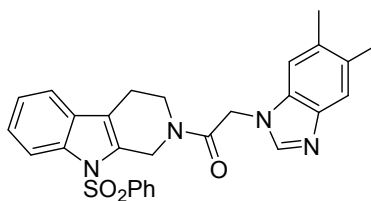

21

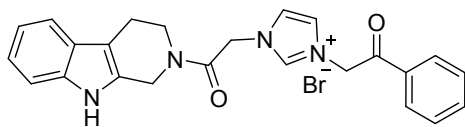

22

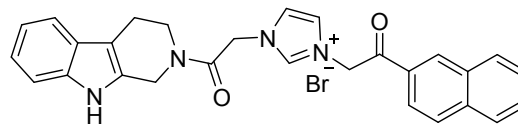

23

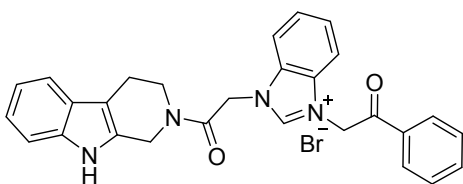

24

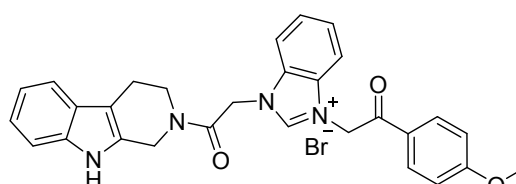

25

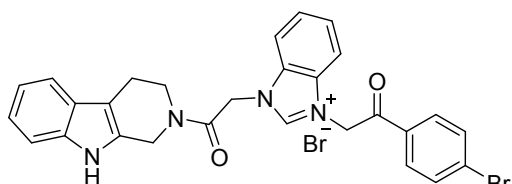

26

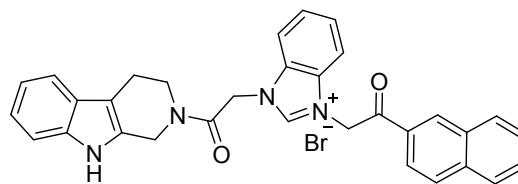

27

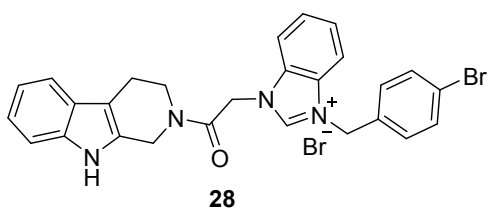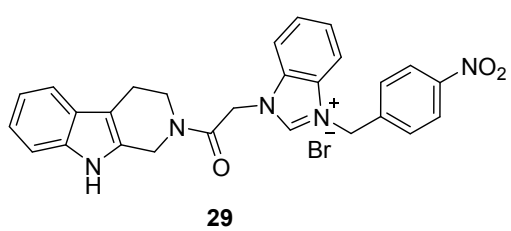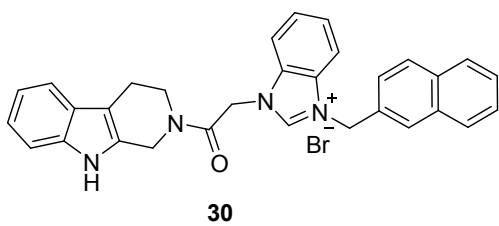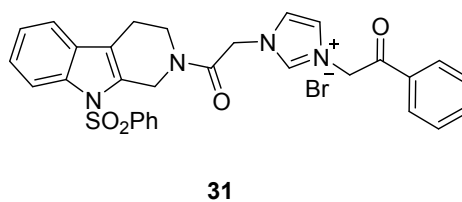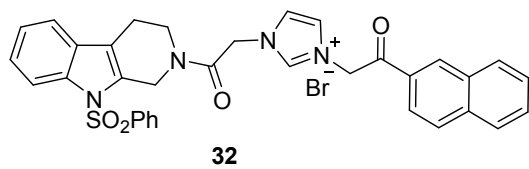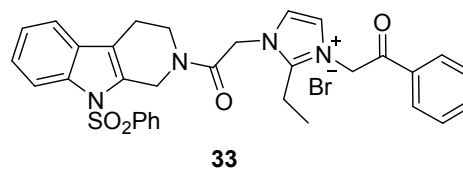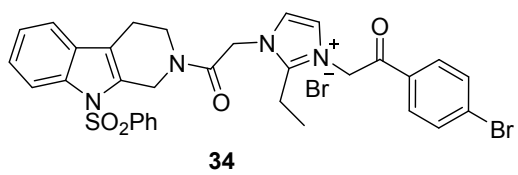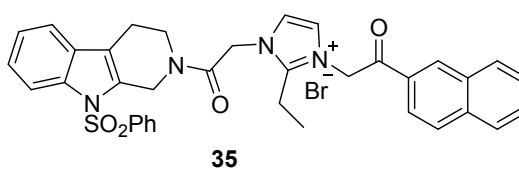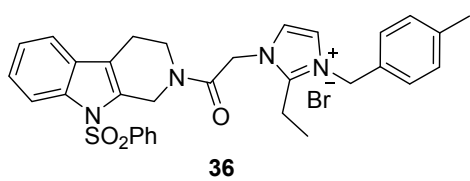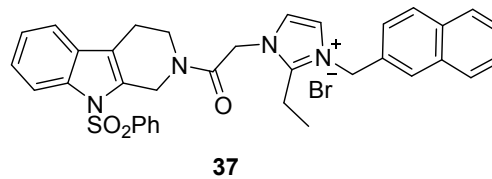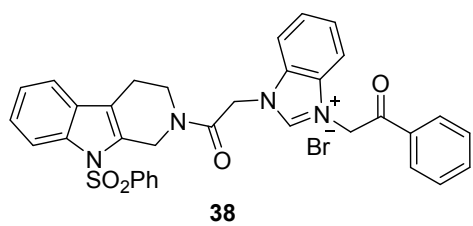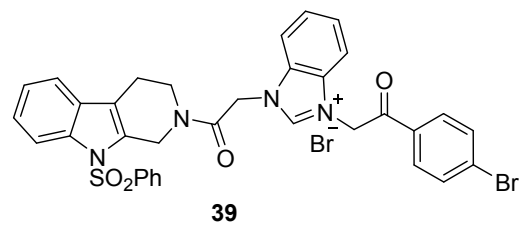

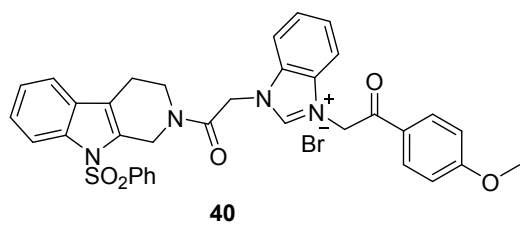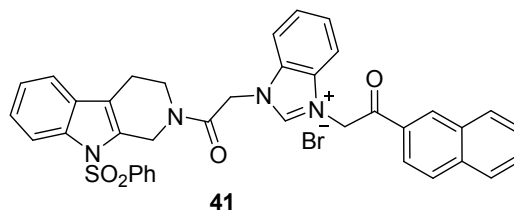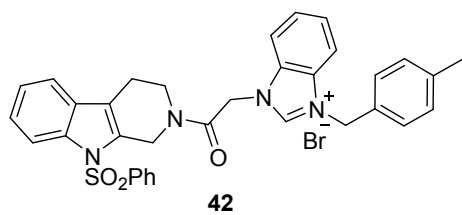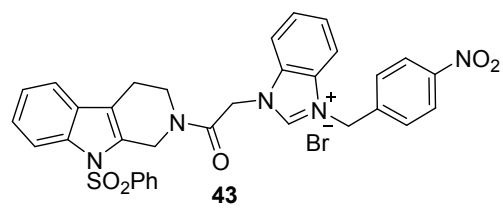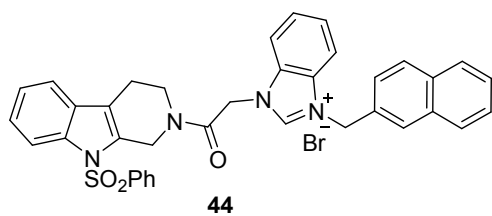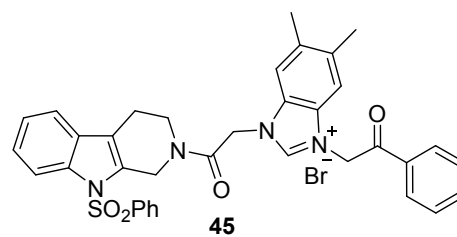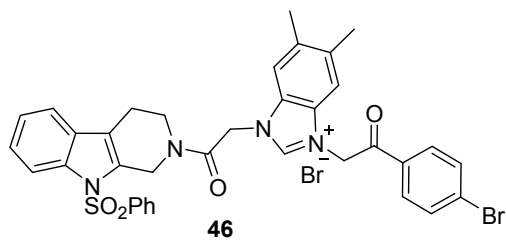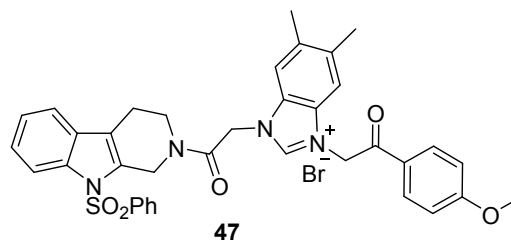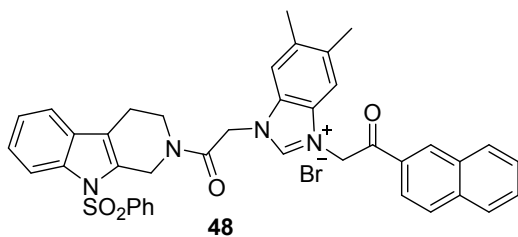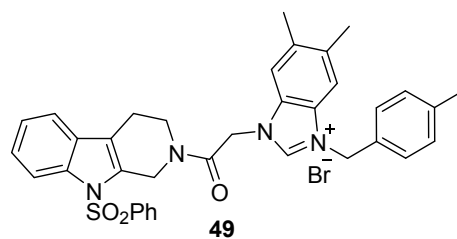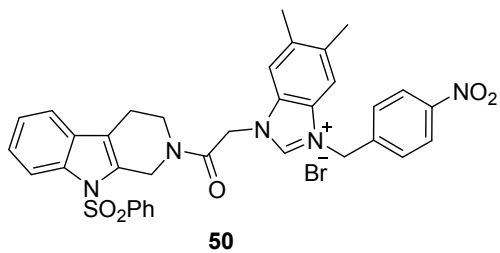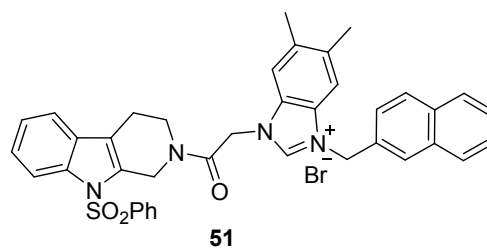



## 2.1 Synthesis of hybrid compounds

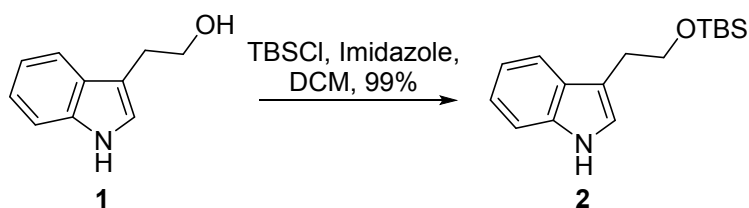

To a stirred solution of tryptophol **1** (1.00g, 6.2 mmol) and imidazole (0.63 g, 9.3 mmol) in dichloromethane (30 mL) at 0°C was added tert-Butyldimethylsilyl chloride (1.00 g, 6.8 mmol) in small portions over a period of 5 minutes, and then at ambient temperature for 1 hours. Reaction progress was monitored by TLC. A small amount of water was added and the mixture was stirred for 10 min. Mixture was washed by CH<sub>2</sub>Cl<sub>2</sub> (3×30 mL). The combined organic phases was dried over Na<sub>2</sub>SO<sub>4</sub> and concentrated. The residue was purified by column chromatography on silica gel (petroleum ether : EtOAc : Et<sub>3</sub>N = 100/1/0.1 as eluant) affording the title compound **2** (1.68g, 99%) as a yellow oil.

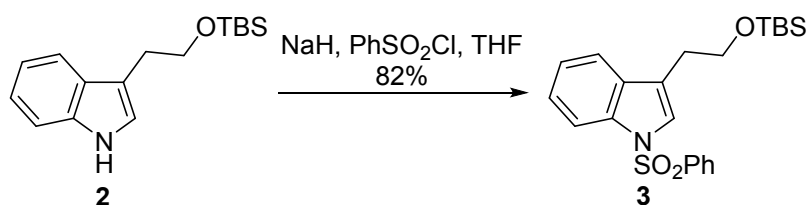

Compound **2** (1.00 g, 3.6 mmol) dissolved in THF (20 mL) at 0°C under inert gas for 15 minutes, and then sodium hydride (60% dispersion in mineral oil, 218mg, 5.4mmol ) was slowly added in small portions over a period of 15 minutes, then mixture kept 0°C for 45 minutes. In sequence, add benzenesulfonyl chloride (0.58mL, 4.6mmol) with a syringe to the mixture, and then mixture at ambient temperature overnight. Mixture quenched by NH<sub>4</sub>Cl (aq., 5 mL), washed by EtOAc (3×30 mL), The combined organic phases was dried over Na<sub>2</sub>SO<sub>4</sub> and concentrated. The residue was purified by column chromatography on silica gel (petroleum ether : EtOAc : Et<sub>3</sub>N = 100/0.8/0.1 as eluant) affording compound **3** (1.24g, 82%) as a solid compound.

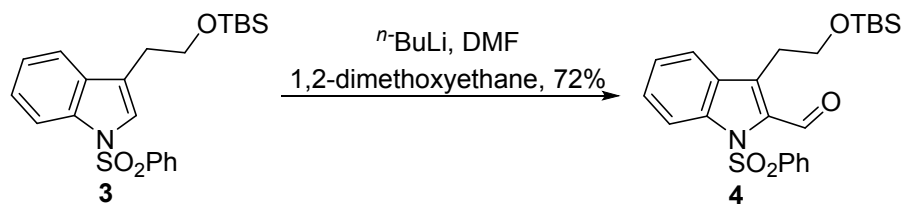

Compound **3** (1.00 g, 2.4 mmol) dissolved in 1,2-dimethoxyethane (20 mL) at  $-78^{\circ}\text{C}$  under inert gas for 15 minutes, and then  $n\text{-BuLi}$  (1M solution in hexanes, 3.6mL, 3.6mmol ) was slowly added with a syringe over a period of 5 minutes, then mixture kept  $-78^{\circ}\text{C}$  for 45 minutes. Anhydrous DMF (1.1mL, 14.4mmol) was added quickly to the mixture. After 30 minutes, mixture warmed to ambient temperature for 2 hours. Mixture quenched by  $\text{NH}_4\text{Cl}$  (aq., 5 mL), washed by EtOAc (3 $\times$ 30 mL), The combined organic phases was dried over  $\text{Na}_2\text{SO}_4$  and concentrated. The residue was purified by column chromatography on silica gel (petroleum ether : EtOAc :  $\text{Et}_3\text{N}$  = 100/1/0.1 as eluant) affording the title compound **4** (770 mg, 72%) as a solid compound.  $^1\text{H NMR}$  (400 MHz,  $\text{CDCl}_3$ ):  $\delta$  = 10.58 (1H, s), 8.21 (1H, d,  $J$ = 8.0 Hz), 7.71-7.66 (3H, m), 7.54-7.48 (2H, m), 7.38-7.26 (3H, m), 3.78 (2H, t,  $J$ = 16 Hz), 3.17 (2H, t,  $J$ = 12 Hz), 0.69 (9H, s), -0.221 (6H, s).  $^{13}\text{C NMR}$  (100 MHz,  $\text{CDCl}_3$ ):  $\delta$  = 184.85, 137.55, 137.28, 134.58, 134.22, 133.27, 130.89, 129.26, 126.81, 124.68, 122.90, 115.64, 77.47, 77.16, 76.84, 63.21, 28.73, 25.87, 18.24.

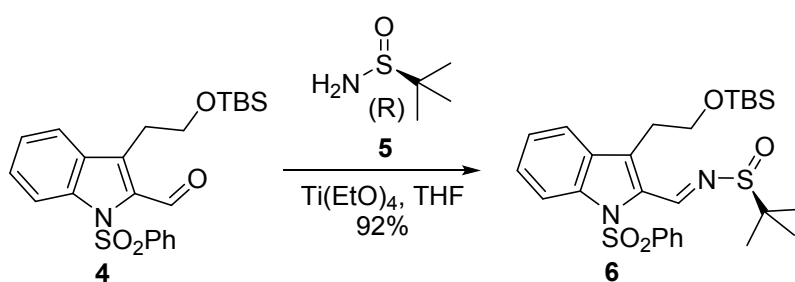

compound **4** (700 mg, 1.6 mmol), dissolved in THF(20 mL) under inert gas at room temperature, (R)-(+)-2-Methyl-2-propanesulfonamide (213mg, 1.76mmol) was added to the mixture, and titanium ethoxide (0.67mL, 3.2mmol) added in sequence. Reaction progress was monitored by TLC. Quench reaction by the adding of EtOAc (50 mL) while the mixture was stirred vigorously to prevent concretion. Mixture was stirred for 15 minutes followed by the washed of EtOAc (2 $\times$ 30 mL). The combined organic

phases was dried over Na<sub>2</sub>SO<sub>4</sub> and concentrated. The residue was purified by column chromatography on silica gel (petroleum ether : EtOAc : Et<sub>3</sub>N = 10/1/0.1 as eluant) affording compound **6** (793mg, 92%) as a yellow solid. <sup>1</sup>H NMR (400 MHz, CDCl<sub>3</sub>): δ = 9.31 (1H, s), 8.27 (1H, d, J=8.4 Hz), 7.76 (2H, d, J= 7.6 Hz), 7.65 (1H, d, J= 4.0 Hz), 7.52-7.44 (2H, m), 7.38 (2H, d, J= 7.6 Hz), 7.35- 7.26 (1H, m), 3.76 (2H, t, J= 13.2 Hz), 3.28-3.17 (2H, m), 1.27 (9H, s), 0.71 (9H, s), 0.23 (6H, s). <sup>13</sup>C NMR (100 MHz, CDCl<sub>3</sub>): δ = 155.41, 138.17, 137.51, 134.10, 131.03, 130.72, 130.00, 129.33, 127.99, 126.81, 124.31, 121.79, 115.40, 77.47, 77.16, 76.84, 62.85, 57.98, 29.18, 15.88, 22.69, 18.27.

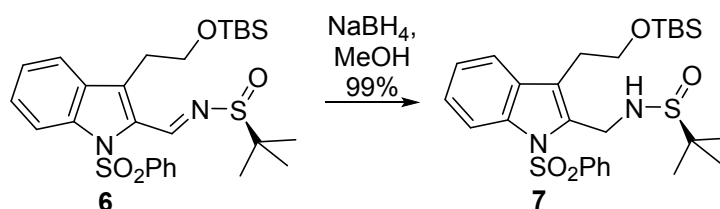

To a stirred solution of compound **6** (700 mg, 1.3 mmol) in MeOH (20 mL) at 0°C was added sodium borohydride (73 mg, 1.9 mmol) in small portions over a period of 10 minutes, and then mixture at 0°C for 1 hour. Reaction progress was monitored by TLC. A small amount of water was added and the mixture was stirred for 10 min. Mixture was washed by CH<sub>2</sub>Cl<sub>2</sub> (3×30 mL). The combined organic phases was dried over Na<sub>2</sub>SO<sub>4</sub> and concentrated. The residue was purified by column chromatography on silica gel (petroleum ether : EtOAc : Et<sub>3</sub>N = 80/10/0.1 as eluant) affording the title compound **7** (700mg, 99%) as a yellow solid. <sup>1</sup>H NMR (400 MHz, CDCl<sub>3</sub>): δ = 8.12 (1H, d, J=8.4 Hz), 7.78 (2H, d, J= 7.6 Hz), 7.53-7.48 (2H, m), 7.40 (2H, t), 7.33- 7.23 (3H, m), 4.65-4.60 (1H, m), 4.55-4.47 (2H, m), 3.76-3.74 (2H, m), 1.19 (9H, s), 0.77 (9H, s), -0.16 (6H, d, J= 7.6 Hz).

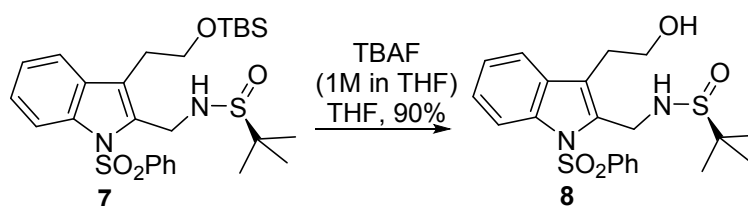



purified by column chromatography on silica gel (petroleum ether : EtOAc : Et<sub>3</sub>N = 10/1/0.1 as eluant) affording the title compound **10** (400 mg, 99%) as a yellow solid. <sup>1</sup>H NMR (400 MHz, CDCl<sub>3</sub>): δ = 8.06 (1H, d, J=8.4 Hz), 7.84 (2H, d, J = 4.0 Hz), 7.51 (1H, t, J = 8.0 Hz), 7.42 (2H, t, J = 8.0 Hz), 7.34 (1H, d, J = 7.6 Hz), 7.28-7.20 (3H, m), 4.82 (1H, d), 4.49 (1H, d), 3.55-3.51 (1H, m), 3.44-3.41 (1H, m), 2.80-2.75 (2H, m) 1.24 (9H, s). <sup>13</sup>C NMR (100 MHz, CDCl<sub>3</sub>): δ = 138.21, 135.87, 133.79, 131.70, 129.79, 129.30, 126.57, 124.63, 123.60, 118.33, 117.70, 114.24, 77.33, 77.02, 76.70, 60.40, 58.75, 44.65, 43.25, 22.99, 21.66, 21.05, 14.20.

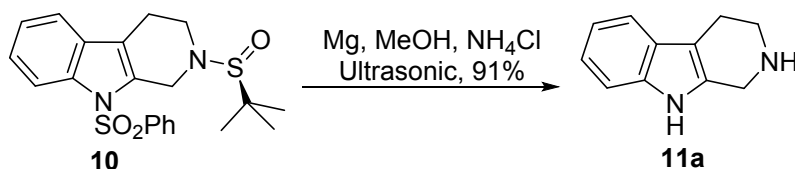

Compound **10** (400 mg, 0.96 mmol) in DMF (20 mL) added magnesium powder (200 mg) and NH<sub>4</sub>Cl (5 mg, 0.096 mmol), mixture under ultrasonic equipment at room temperature under inert gas for 2 hours. Reaction progress was monitored by TLC. A small amount of water was added and the mixture was stirred for 10 min at room temperature. Mixture was washed by CH<sub>2</sub>Cl<sub>2</sub> (2×50 mL). The combined organic phases was dried over Na<sub>2</sub>SO<sub>4</sub> and concentrated. The residue was purified by column chromatography on silica gel (petroleum ether : EtOAc : Et<sub>3</sub>N = 50/10/0.1 as eluant) affording compound **11a** (150mg, 91%) as a yellow solid.

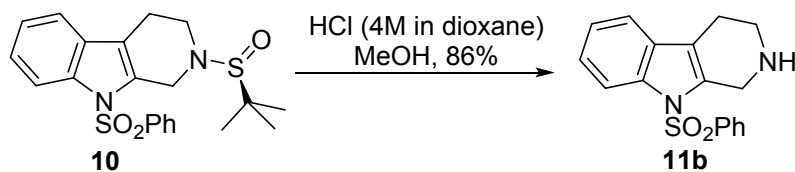

To a stirred solution of compound **10** (500 mg, 1.2 mmol) in MeOH (20 mL) at 0°C was added HCl (4M in dioxane, 3 mL, 12 mmol), and then mixture at room temperature for 3 hour. Reaction progress was monitored by TLC. Mixture was washed by EtOAc (2×50 mL). The combined organic phases was dried over Na<sub>2</sub>SO<sub>4</sub> and concentrated. The residue was purified by column chromatography on silica gel

(petroleum ether : EtOAc : Et<sub>3</sub>N = 80/10/0.1 as eluant) affording compound **11b** (350 mg, 86%) as a yellow solid. <sup>1</sup>H NMR (400 MHz, CDCl<sub>3</sub>): δ = 8.13 (1H, d, J=8.0 Hz), 7.79 (2H, d, J= 7.6 Hz), 7.54-7.50 (1H, m), 7.43-7.22 (5H, m), 4.29 (2H, s), 3.12-3.10 (2H, m), 2.64 (2H, d, J= 4.0 Hz), 1.75 (1H, s). <sup>13</sup>C NMR (100 MHz, CDCl<sub>3</sub>): δ = 138.92, 136.00, 134.19, 133.81, 130.30, 129.43, 126.50, 124.52, 123.59, 118.33, 117.52, 114.34, 77.47, 77.15, 16.64, 44.63, 42.77, 22.78.

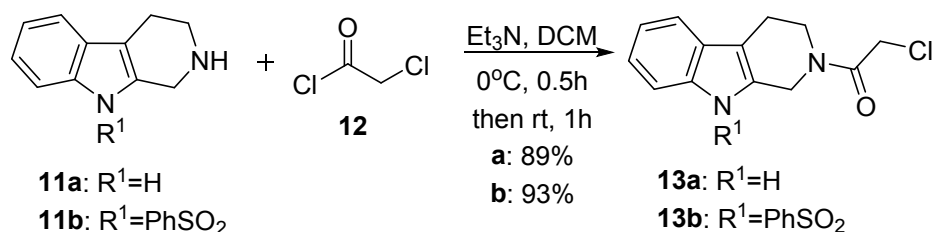

To a stirred solution of compound **11a** (173 mg, 1 mmol) and triethylamine (0.28 mL, 2 mmol) in dichloromethane (10 mL) at 0°C was added chloroacetyl chloride (87 μL, 1.1 mmol) dropwise over a period of 10 minutes, and then at ambient temperature for 1 h. Reaction progress was monitored by TLC. A small amount of water was added and the mixture was stirred for 10 min. The aqueous phase was washed with CH<sub>2</sub>Cl<sub>2</sub> (4×50 mL). The combined organic phases were dried over Na<sub>2</sub>SO<sub>4</sub> and concentrated. The residue was purified by column chromatography on silica gel (petroleum ether : EtOAc : Et<sub>3</sub>N = 80/10/0.1 as eluant) affording the title compound **13a** (220 mg, 89%) as a red solid.

To a stirred solution of compound **11b** (312 mg, 1 mmol) and triethylamine (0.28 mL, 2 mmol) in dichloromethane (10 mL) at 0°C was added chloroacetyl chloride (87 μL, 1.1 mmol) dropwise over a period of 10 minutes, and then at ambient temperature for 1 h. Reaction progress was monitored by TLC. A small amount of water was added and the mixture was stirred for 10 min. The aqueous phase was washed with CH<sub>2</sub>Cl<sub>2</sub> (4×50 mL). The combined organic phases were dried over Na<sub>2</sub>SO<sub>4</sub> and concentrated. The residue was purified by column chromatography on silica gel (petroleum ether : EtOAc : Et<sub>3</sub>N = 80/10/0.1 as eluant) affording the title compound **13b** (360 mg, 93%) as a red solid.

## 2.2 Synthesis of hybrid compounds

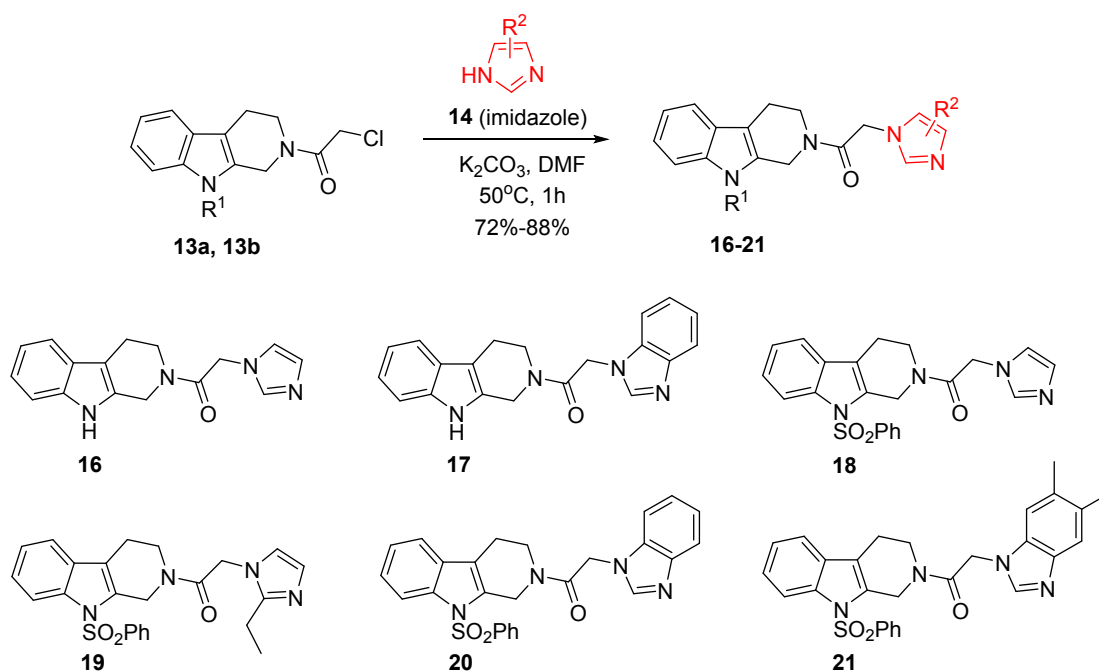

A mixture of compound **13** (2 mmol) and imidazole or substituted imidazole (6 mmol) and  $\text{K}_2\text{CO}_3$  (3 mmol) was stirred in DMF (20 ml) at  $50^\circ\text{C}$  for 1 h (monitored by TLC). After cooling to room temperature, the solvent was concentrated, and the residue was diluted with EtOAc (20 mL). The organic layer was washed with water (20 mL) and brine (20 mL), dried over anhydrous  $\text{Na}_2\text{SO}_4$  and concentrated. The residue was purified by column chromatography (silica gel, petroleum ether : EtOAc :  $\text{Et}_3\text{N}$  = 1:1:0.1) to afford **16-21** in 72-88% yield as yellow solid.

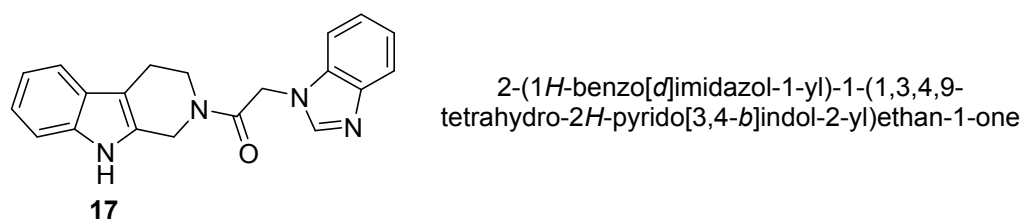

Yield 88%. Yellow solid. Mp  $275-276^\circ\text{C}$ . IR  $\nu_{\text{max}}$  ( $\text{cm}^{-1}$ ): 3729.96, 3391.12, 3158.44, 3055.81, 2976.81, 2926.60, 2882.33, 2842.56, 2761.58, 2657.92, 2314.66, 1951.10, 1902.33, 1862.31, 1776.74, 1657.75, 1503.21, 1460.00, 1253.49, 1210.94, 1040.11, 890.19, 849.07, 806.18, 736.32.  $^1\text{H}$  NMR (400 MHz, DMSO):  $\delta$  = 10.94 (1H, d), 8.13 (1H, d), 7.65 (1H, d,  $J = 7.6$  Hz), 7.50 (1H, d,  $J = 7.2$  Hz), 7.44 (1H, d,  $J = 7.2$

Hz), 7.37-7.30 (1H, m), 7.19 (2H, d, J = 5.2 Hz), 7.07-7.01 (1H, m), 6.98 (1H, t, J = 7.2 Hz), 5.46 (2H, d, J = 7.6 Hz), 4.79 (2H, d), 3.94-3.85 (2H, m), 2.92 (2H, s). <sup>13</sup>C NMR (100 MHz, DMSO): δ = 167.13, 166.96, 146.06, 145.99, 144.01, 137.13, 136.85, 135.74, 135.67, 131.68, 131.14, 127.45, 127.33, 123.07, 122.23, 121.79, 120.15, 119.51, 118.49, 112.00, 111.59, 111.47, 108.21, 107.54, 22.37, 21.51. HRMS (ESI-TOF) m/z Calcd for C<sub>20</sub>H<sub>18</sub>N<sub>4</sub>O [M+H]<sup>+</sup> 331.1553. found 331.1553.

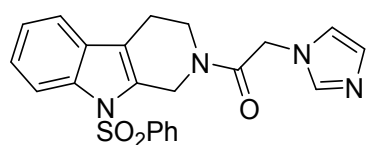

**18**

2-(1*H*-imidazol-1-yl)-1-(9-(phenylsulfonyl)-1,3,4,9-tetrahydro-2*H*-pyrido[3,4-*b*]indol-2-yl)ethan-1-one

Yield 82%. Yellow solid. Mp 77-79 °C. IR v<sub>max</sub> (cm<sup>-1</sup>): 3398.76, 3106.331, 3061.73, 2923.87, 2855.41, 2663.50, 2589.61, 2472.49, 1811.20, 1667.08, 1511.55, 1451.83, 1370.47, 1297.24, 1223.09, 1178.93, 1138.54, 1088.49, 959.36, 800.59, 754.84, 602.77, 562.26. <sup>1</sup>H NMR (400 MHz, DMSO): δ = 8.16-8.09 (1H, m), 7.87 (1H, d, J = 8.0 Hz), 7.74 (1H, d, J = 7.6 Hz), 7.58-7.47 (2H, m), 7.45-7.28 (5H, m), 7.11 (1H, s), 6.97 (1H, s), 5.11 (1H, s), 4.89 (2H, d, J = 10.0 Hz), 3.92 (1H, t, J = 9.6 Hz), 3.74 (1H, t, J = 10.4 Hz), 2.74 (2H, s). <sup>13</sup>C NMR (100 MHz, DMSO): δ = 165.62, 165.37, 138.38, 138.22, 136.45, 134.37, 130.78, 129.88, 129.72, 129.63, 129.16, 129.09, 129.02, 126.70, 126.35, 125.53, 125.10, 124.19, 123.86, 120.33, 119.06, 118.92, 118.45, 116.07, 114.41, 53.55, 48.61, 48.56, 46.49, 44.17, 42.64, 42.23, 39.87, 22.16, 20.92. HRMS (ESI-TOF) m/z Calcd for C<sub>22</sub>H<sub>20</sub>N<sub>4</sub>O<sub>3</sub>S [M+H]<sup>+</sup> 421.1328. found 421.1329.

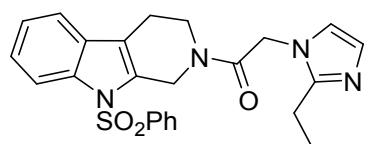

**19**

2-(2-ethyl-1*H*-imidazol-1-yl)-1-(9-(phenylsulfonyl)-1,3,4,9-tetrahydro-2*H*-pyrido[3,4-*b*]indol-2-yl)ethan-1-one

Yield 88%. Yellow solid. Mp 147-148 °C. IR v<sub>max</sub> (cm<sup>-1</sup>): 3874.17, 3832.90, 3729.52, 3390.04, 3101.13, 3062.02, 2976.98, 2927.11, 2314.59, 1759.46, 1665.86, 1451.48, 1370.30, 1221.98, 1179.24, 1087.08, 1053.64, 959.88, 885.61, 755.20,



717.28, 680.70, 603.30, 587.29, 562.91. <sup>1</sup>H NMR (400 MHz, DMSO): δ = 8.13-7.99 (1H, m), 7.85 (1H, d, J= 8.0 Hz), 7.73 (1H, d, J= 7.6 Hz), 7.56-7.50 (1H, m), 7.46-7.39 (4H, m), 7.35-7.26 (1H, m), 6.98 (1H, m), 6.80 (1H, s), 5.10 (1H, s), 4.90 (1H, s), 4.76 (2H, d, J=8.4 Hz), 3.91 (1H, t, J= 11.2 Hz), 3.73 (1H, t, J= 11.2 Hz), 2.73 (2H, d, J= 6 Hz), 2.61-2.56 (2H, m), 1.32-1.24 (3H, m). <sup>13</sup>C NMR (100 MHz, DMSO): δ = 165.57, 165.38, 162.52, 149.97, 149.85, 138.21, 136.30, 135.95, 134.24, 134.01, 130.77, 129.58, 129.48, 129.05, 128.94, 127.54, 127.47, 126.57, 126.22, 125.39, 124.97, 124.07, 123.74, 120.17, 120.12, 118.97, 118.78, 118.32, 115.98, 114.29, 60.38, 47.55, 47.38, 44.00, 42.40, 42.15, 39.77, 36.46, 31.42, 22.05, 21.04, 20.83, 20.02, 14.19, 11.68. HRMS (ESI-TOF) m/z Calcd for C<sub>24</sub>H<sub>24</sub>N<sub>4</sub>O<sub>3</sub>S [M+H]<sup>+</sup> 449.1641. found 449.1639. Anal. Calcd for C<sub>24</sub>H<sub>24</sub>N<sub>4</sub>O<sub>3</sub>S: C 64.27, H 5.39, 12.49; Found: C 63.90, H 5.45, N 12.54.

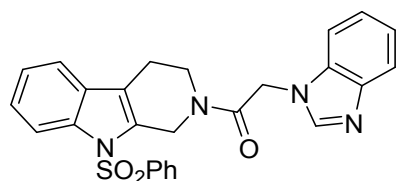

**20**

2-(1*H*-benzo[*d*]imidazol-1-yl)-1-(9-(phenylsulfonyl)-1,3,4,9-tetrahydro-2*H*-pyrido[3,4-*b*]indol-2-yl)ethan-1-one

Yield 72%. Yellow solid. Mp 139-140 °C. IR  $\nu_{\text{max}}$  (cm<sup>-1</sup>): 3874.06, 3831.88, 3729.67, 3629.29, 3381.15, 3053.30, 2933.22, 2850.49, 2386.46, 2315.05, 1902.38, 1808.91, 1655.02, 1452.87, 1415.40, 1370.82, 1222.87, 1178.06, 1086.98, 960.29, 879.37, 752.70, 676.04, 600.49, 560.28. <sup>1</sup>H NMR (400 MHz, DMSO): δ = 8.12 (1H, t), 7.91 (1H, d, J= 2.8 Hz), 7.82 (2H, t), 7.74 (1H, d, J=7.6 Hz), 7.55-7.33 (10H, m), 5.09-4.98 (4H, m), 3.88 (1H, s), 3.77 (1H, s), 2.73 (2H, s). <sup>13</sup>C NMR (100 MHz, DMSO): δ = 165.23, 164.96, 143.78, 143.67, 143.50, 138.17, 136.32, 135.93, 134.25, 134.02, 130.67, 129.59, 129.48, 129.05, 128.92, 126.53, 126.22, 125.41, 124.97, 124.08, 123.73, 123.32, 122.39, 122.34, 120.53, 120.44, 119.00, 118.83, 118.35, 115.95, 114.27, 109.48, 109.32, 46.47, 16.17, 44.12, 42.48, 42.13, 39.78. HRMS (ESI-TOF) m/z Calcd for C<sub>26</sub>H<sub>22</sub>N<sub>4</sub>O<sub>3</sub>S [M+H]<sup>+</sup> 471.1485. found 471.1486. Anal. Calcd for C<sub>26</sub>H<sub>22</sub>N<sub>4</sub>O<sub>3</sub>S: C 66.37, H 4.71, N 11.91; Found: C 66.20, H 4.83, N 12.02.

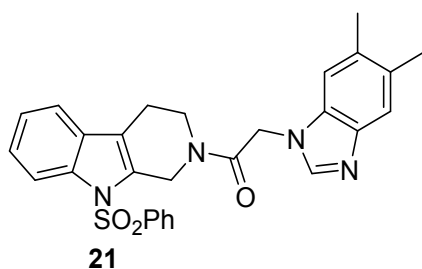

2-(5,6-dimethyl-1*H*-benzo[*d*]imidazol-1-yl)-1-(9-(phenylsulfonyl)-1,3,4,9-tetrahydro-2*H*-pyrido[3,4-*b*]indol-2-yl)ethan-1-one

Yield 76%. Yellow solid. Mp 278-279 °C. IR  $\nu_{\text{max}}$  ( $\text{cm}^{-1}$ ): 3101.40, 3059.93, 3020.07, 2971.26, 2920.64, 2849.21, 2315.67, 1952.17, 1903.14, 1793.92, 1658.60, 1508.84, 1416.91, 1370.55, 1221.56, 1179.85, 1080.26, 880.44, 840.73, 791.34, 754.97, 715.54, 691.55, 604.57, 562.96.  $^1\text{H}$  NMR (400 MHz, DMSO):  $\delta$  = 8.05-7.87 (4H, m), 7.68-7.52 (4H, m), 7.42 (1H, s), 7.39-7.32 (1H, m), 7.30-7.26 (2H, m), 5.43 (2H, d), 5.15 (2H, s), 3.93-3.82 (2H, m), 2.90 (2H, s), 2.29 (6H, d,  $J$  = 6.0 Hz).  $^{13}\text{C}$  NMR (100 MHz, DMSO):  $\delta$  = 166.85, 144.62, 142.16, 137.47, 135.57, 135.20, 133.74, 131.44, 131.20, 130.40, 130.05, 129.55, 127.10, 126.78, 125.38, 124.36, 119.75, 119.42, 117.94, 114.23, 111.12, 111.09, 21.81, 20.57, 20.32. HRMS (ESI-TOF)  $m/z$  Calcd for  $\text{C}_{28}\text{H}_{26}\text{N}_4\text{O}_3\text{S}$   $[\text{M}+\text{H}]^+$  499.1798. found 499.1796.

### 2.3 Synthesis of compounds 22-51

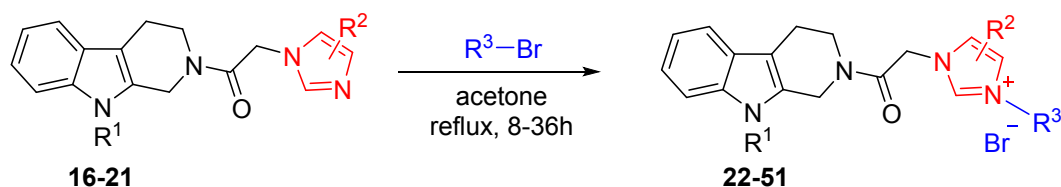

|           | R <sup>1</sup>      | R <sup>2</sup> (imidazole ring) |
|-----------|---------------------|---------------------------------|
| <b>16</b> | H,                  | imidazole                       |
| <b>17</b> | H,                  | benzimidazole                   |
| <b>18</b> | PhSO <sub>2</sub> , | imidazole                       |
| <b>19</b> | PhSO <sub>2</sub> , | 2-Ethyl-imidazole               |
| <b>20</b> | PhSO <sub>2</sub> , | benzimidazole                   |
| <b>21</b> | PhSO <sub>2</sub> , | 5,6-dimethyl-benzimidazole      |

R<sup>3</sup> = phenacyl or benzyl  
or naphthylacyl  
or naphthylmethyl

75%-92%

A mixture of substituted imidazole **16-21** (0.25 mmol) and phenacylbromides or phenacyl or benzyl or naphthylacyl or naphthylmethyl (0.75 mmol) was stirred in

acetone (10 ml) at reflux 8-36 h. An insoluble substance was formed. After completion of the reaction as indicated by TLC, the precipitate was filtered and washed with acetone (3 × 10 ml), then dried to afford imidazolium salts **22-51** in 75–92% yields.

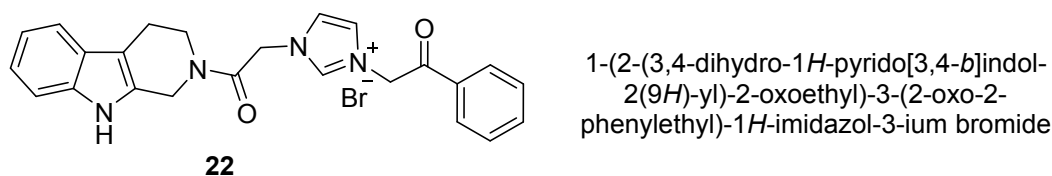

Yield 78%. Yellow solid. Mp 201-202 °C. IR  $\nu_{\max}$  (cm<sup>-1</sup>): 3413.84, 3150.03, 3113.89, 3051.00, 2999.56, 2904.48, 2853.30, 1700.60, 1659.21, 1479.58, 1417.24, 1351.58, 1225.65, 1172.21, 1045.57, 992.83, 813.01, 750.99, 684.37, 621.72. <sup>1</sup>H NMR (400 MHz, DMSO):  $\delta$  = 10.97 (1H, s), 9.06 (1H, s), 8.07 (2H, d, J= 7.6 Hz), 7.76 (3H, d, J= 8.4 Hz), 7.64 (2H, t, J= 12.8 Hz), 7.44 (H, d, J= 7.2 Hz), 7.34 (1H, t, J= 14 Hz), 7.06 (1H, t), 6.99 (1H, t), 6.13 (2H, s), 5.63 (2H, d, J= 8.8 Hz), 4.76 (2H, s), 3.90-3.82 (2H, m), 2.91 (2H, s). <sup>13</sup>C NMR (100 MHz, DMSO):  $\delta$  = 206.94, 191.73, 165.02, 164.88, 139.13, 136.63, 136.39, 134.97, 134.19, 130.87, 130.21, 129.56, 128.60, 126.92, 126.78, 124.32, 123.86, 121.53, 121.40, 119.09, 118.06, 118.01, 111.56, 107.67, 107.00, 79.81, 79.48, 79.15, 56.00, 51.00, 31.16, 21.77, 20.99. HRMS (ESI-TOF)  $m/z$  Calcd for C<sub>28</sub>H<sub>25</sub>BrN<sub>4</sub>O<sub>2</sub> [M-Br]<sup>+</sup>, 449.1972. found 449.1975.

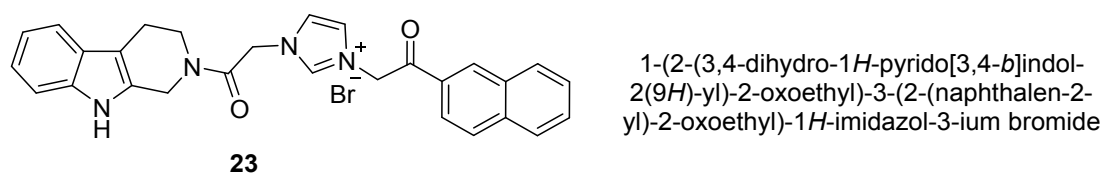

Yield 92%. Yellow solid. Mp 249-251 °C. IR  $\nu_{\max}$  (cm<sup>-1</sup>): 3421.71, 3280.54, 3072.96, 2977.66, 2922.79, 2850.08, 1693.46, 1657.23, 1563.26, 1436.89, 1226.38, 1176.46, 1046.60, 812.82, 746.35, 647.12, 477.92. <sup>1</sup>H NMR (400 MHz, DMSO):  $\delta$  = 10.97 (1H, d), 9.10 (1H, s), 8.83 (1H, s), 8.20 (1H, d, J= 8 Hz), 8.14 (1H, d, J= 8.8 Hz), 8.06 (2H, t), 7.80-7.68 (4H, m), 7.44 (1H, t, J= 2.4 Hz), 7.08-6.97 (2H, m), 6.26 (2H, s), 5.64 (2H, d, J= 8.4 Hz), 4.77 (2H, s), 3.92-3.83 (2H, m), 2.92 (2H, s). <sup>13</sup>C NMR (100 MHz,

DMSO):  $\delta = 191.64, 165.03, 164.90, 139.19, 136.64, 136.39, 135.99, 132.50, 131.51, 130.91, 130.88, 130.21, 130.21, 130.13, 129.80, 129.26, 128.36, 127.89, 126.92, 126.78, 124.38, 123.92, 123.66, 121.54, 121.41, 119.10, 118.07, 118.02, 111.57, 107.69, 107.01, 79.80, 79.47, 79.14, 56.04, 54.14, 51.02, 21.77, 21.00$ . HRMS (ESI-TOF)  $m/z$  Calcd for  $C_{28}H_{25}BrN_4O_2$  [M-Br]<sup>+</sup>, 399.1815. found 399.1814.

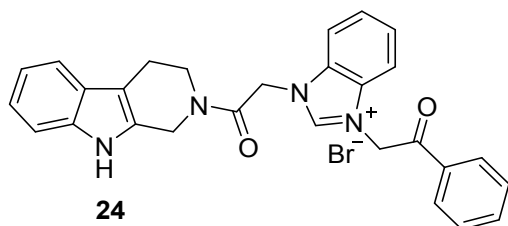

1-(2-oxo-2-(1,3,4,9-tetrahydro-2H-pyrido[3,4-b]indol-2-yl)ethyl)-3-(2-oxo-2-phenylethyl)-1H-benzo[d]imidazol-3-ium bromide

Yield 92%. Yellow solid. Mp 236-238 °C. IR  $\nu_{\max}$  (cm<sup>-1</sup>): 3872.82, 3831.06, 3728.97, 3385.38, 3242.16, 3044.78, 2986.56, 2984.12, 2923.21, 2811.05, 2315.21, 1697.14, 1666.83, 1565.33, 1481.06, 1233.45, 1044.26, 984.62, 749.84, 683.08. <sup>1</sup>H NMR (400 MHz, DMSO):  $\delta = 11.00$  (1H, d), 9.65 (1H, d), 8.15-8.09 (4H, m), 7.80 (1H, t, J= 14.4 Hz), 7.68 (4H, t, J= 14.4 Hz), 7.46 (1H, t), 7.40-7.32 (1H, m), 7.07 (1H, t), 7.00 (1H, t, J= 14.4 Hz), 6.49 (1H, s), 5.98 (2H, d, J= 12 Hz), 4.84 (2H, d), 3.93 (2H, d), 3.00 (2H, d). <sup>13</sup>C NMR (100 MHz, DMSO):  $\delta = 192.10, 165.22, 165.02, 145.60, 145.50, 137.14, 136.89, 135.55, 134.74, 132.67, 132.60, 132.49, 131.28, 130.80, 130.03, 129.39, 127.63, 127.42, 127.29, 122.04, 121.92, 119.60, 118.56, 114.98, 114.90, 112.07, 108.17, 107.56, 54.32, 22.31, 21.51$ . HRMS (ESI-TOF)  $m/z$  Calcd for  $C_{28}H_{25}BrN_4O_2$  [M-Br]<sup>+</sup> 449.1972. found 449.1972.

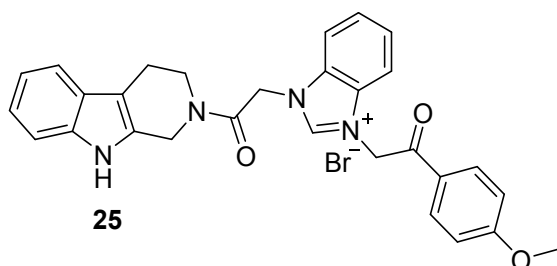

3-(2-(4-methoxyphenyl)-2-oxoethyl)-1-(2-oxo-2-(1,3,4,9-tetrahydro-2H-pyrido[3,4-b]indol-2-yl)ethyl)-1H-benzo[d]imidazol-3-ium bromide

Yield 88%. Yellow solid. Mp 258-260 °C. IR  $\nu_{\max}$  (cm<sup>-1</sup>): 3874.29, 3729.79, 3393.09, 3226.77, 3002.79, 2922.01, 2849.00, 2313.76, 1677.56, 1603.84, 1563.77, 1424.79, 1255.33, 1235.52, 1173.63, 1037.62, 978.96, 844.64, 752.82. <sup>1</sup>H NMR (400 MHz,

DMSO):  $\delta$  = 10.99 (1H, d), 9.63 (1H, d), 8.12-8.05 (4H, m), 7.68 (2H, d,  $J$  = 8.8 Hz), 7.46 (1H, t), 7.39-7.32 (1H, m), 7.20 (2H, d,  $J$  = 8.4 Hz), 7.09 (1H, t), 7.05-6.98 (1H, m), 6.42 (2H, s), 5.95 (2H, d,  $J$  = 11.6 Hz), 4.83 (2H, d), 3.96- 3.91 (5H, m), 2.92 (2H, d).  $^{13}\text{C}$  NMR (100 MHz, DMSO):  $\delta$  = 190.31, 165.19, 165.03, 145.67, 137.15, 136.90, 132.66, 132.60, 132.50, 131.84, 131.29, 130.80, 127.62, 127.43, 127.30, 122.06, 121.91, 119.62, 118.57, 115.30, 114.85, 112.08, 108.20, 107.57, 56.79, 53.87, 22.31, 21.52. HRMS (ESI-TOF)  $m/z$  Calcd for  $\text{C}_{29}\text{H}_{27}\text{BrN}_4\text{O}_3$   $[\text{M}-\text{Br}]^+$ , 479.2077. found 479.2080. Anal. Calcd for  $\text{C}_{29}\text{H}_{27}\text{BrN}_4\text{O}_3$ : C 62.26, H 4.86, N 10.01; Found: C 62.18, H 4.76, N 10.03.

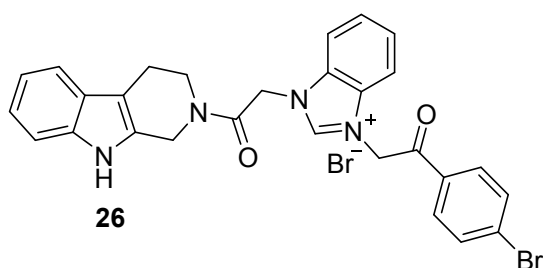

3-(2-(4-bromophenyl)-2-oxoethyl)-1-(2-oxo-2-(1,3,4,9-tetrahydro-2H-pyrido[3,4-*b*]indol-2-yl)ethyl)-1H-benzimidazol-3-ium bromide

Yield 78%. Yellow solid. Mp 240-242 °C. IR  $\nu_{\text{max}}$  ( $\text{cm}^{-1}$ ): 3873.89, 3729.56, 3386.89, 3253.00, 2991.69, 2923.63, 2810.72, 2717.25, 2314.06, 1918.02, 1695.49, 1663.80, 1575.83, 1480.66, 1430.65, 1231.84, 1074.53, 981.49, 820.60, 752.61, 492.27.  $^1\text{H}$  NMR (400 MHz, DMSO):  $\delta$  = 11.01 (1H, d), 9.64 (1H, d), 8.07 (4H, t), 7.91 (2H, d,  $J$  = 8.0 Hz), 7.69 (2H, s), 7.45 (1H, t), 7.39-7.31 (1H, m), 7.06 (1H, t,  $J$  = 15.6 Hz), 7.00 (1H, t,  $J$  = 14.4 Hz), 6.47 (2H, s), 5.98 (2H, d,  $J$  = 12.8 Hz), 4.83 (2H, d), 3.92 (2H, d), 2.86 (2H, d).  $^{13}\text{C}$  NMR (100 MHz, DMSO):  $\delta$  = 191.54, 165.24, 165.03, 145.57, 145.47, 137.16, 136.90, 133.83, 133.13, 132.68, 132.61, 132.48, 131.37, 131.30, 130.82, 129.68, 127.66, 127.44, 127.30, 122.06, 121.94, 119.63, 118.59, 115.03, 114.94, 112.10, 108.19, 107.59, 54.35, 22.33, 21.53. HRMS (ESI-TOF)  $m/z$  Calcd for  $\text{C}_{28}\text{H}_{24}\text{Br}_2\text{N}_4\text{O}_2$   $[\text{M}-\text{Br}]^+$ , 527.1077. found 527.1077.

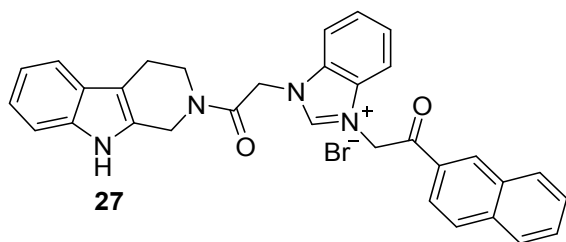

3-(2-(naphthalen-2-yl)-2-oxoethyl)-1-(2-oxo-2-(1,3,4,9-tetrahydro-2H-pyrido[3,4-b]indol-2-yl)ethyl)-1H-benzo[d]imidazol-3-ium bromide

Yield 83%. Yellow solid. Mp 270-271 °C. IR  $\nu_{\max}$  (cm<sup>-1</sup>): 3229.02, 2994.73, 2921.54, 2812.44, 1674.51, 1563.99, 1478.47, 1430.66, 1359.03, 1270.95, 1230.36, 1189.35, 1130.44, 1041.11, 859.37, 814.10, 751.64. <sup>1</sup>H NMR (400 MHz, DMSO):  $\delta$  = 11.01 (1H, d), 9.71 (1H, d), 8.94 (1H, s), 8.23 (1H, s), 8.17-8.08 (10H, m), 7.73 (1H, t), 7.48-7.34 (1H, m), 7.07 (1H, t, J= 15.2 Hz), 7.00 (1H, t, J= 14.4 Hz), 6.63 (2H, s), 6.00 (2H, d, J= 12.8 Hz), 4.83 (2H, d), 3.93 (2H, d), 2.89 (2H, d). <sup>13</sup>C NMR (100 MHz, DMSO):  $\delta$  = 191.98, 165.21, 165.01, 145.64, 145.54, 137.14, 136.89, 136.52, 132.97, 132.69, 132.62, 132.52, 132.05, 131.81, 131.27, 130.78, 130.64, 130.33, 129.66, 128.86, 128.38, 127.63, 127.42, 127.28, 124.31, 122.01, 121.90, 119.58, 118.53, 114.93, 114.88, 112.05, 108.17, 107.56, 54.34, 22.30, 21.49. HRMS (ESI-TOF)  $m/z$  Calcd for C<sub>32</sub>H<sub>27</sub>BrN<sub>4</sub>O<sub>2</sub> [M-Br]<sup>+</sup>, 499.2128. found 499.2128.

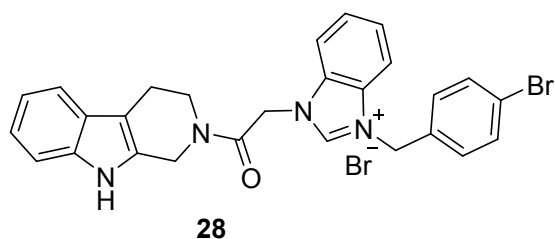

3-(4-bromobenzyl)-1-(2-oxo-2-(1,3,4,9-tetrahydro-2H-pyrido[3,4-b]indol-2-yl)ethyl)-1H-benzo[d]imidazol-3-ium bromide

Yield 88%. Yellow solid. Mp 272-274 °C. IR  $\nu_{\max}$  (cm<sup>-1</sup>): 3436.05, 3227.03, 3120.74, 3059.87, 2961.26, 2925.59, 2857.06, 2792.86, 1837.25, 1657.34, 1610.15, 1563.20, 1520.23, 1431.47, 1350.03, 1224.37, 849.46, 802.90, 745.35. <sup>1</sup>H NMR (400 MHz, DMSO):  $\delta$  = 10.99 (1H, d), 9.80 (1H, d, J= 7.2 Hz), 8.06-8.01 (2H, m), 7.68-7.37 (8H, m), 7.33-7.31 (1H, m), 7.07 (1H, t, J= 15.6 Hz), 7.00 (1H, t, J= 14.8 Hz), 5.86 (4H, t, J= 14.8 Hz), 4.81 (2H, d), 3.90 (2H, t), 2.98 (2H, d). <sup>13</sup>C NMR (100 MHz, DMSO):  $\delta$  = 164.76, 164.55, 144.27, 136.63, 136.37, 133.75, 133.70, 132.67, 132.63, 132.49, 131.06, 131.00, 130.81, 130.76, 130.25, 127.33, 127.18, 126.90, 126.77, 122.70, 122.66, 121.55, 121.44, 119.12, 118.05, 114.60, 114.53, 114.27, 111.58, 107.65, 107.03, 49.67, 48.84, 31.17, 21.79, 21.00. HRMS (ESI-TOF)  $m/z$  Calcd for

C<sub>27</sub>H<sub>24</sub>Br<sub>2</sub>N<sub>4</sub>O [M-Br]<sup>+</sup> 499.1112. found 499.1113. Anal. Calcd for C<sub>27</sub>H<sub>24</sub>Br<sub>2</sub>N<sub>4</sub>O: C 55.88, H 4.17, N 9.65; Found: C 55.56, H 4.10, N 9.76.

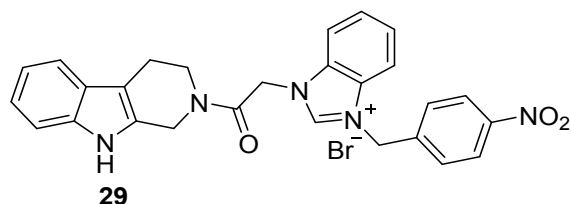

3-(4-nitrobenzyl)-1-(2-oxo-2-(1,3,4,9-tetrahydro-2H-pyrido[3,4-b]indol-2-yl)ethyl)-1H-benzo[d]imidazol-3-ium bromide

Yield 82%. Yellow solid. Mp 279-280 °C. IR  $\nu_{\max}$  (cm<sup>-1</sup>): 3436.05, 3227.03, 3120.74, 3059.87, 2961.26, 2925.59, 2857.06, 2792.86, 1837.25, 1657.34, 1610.15, 1563.20, 1520.23, 1431.47, 1350.03, 1224.37, 849.46, 802.90, 745.35, 657.30. <sup>1</sup>H NMR (400 MHz, DMSO):  $\delta$  = 11.00 (1H, d), 9.90 (1H, d, J= 8.4 Hz), 8.29 (2H, d, J= 4.8 Hz), 8.09 (1H, d, J= 6.8 Hz), 7.98 (1H, t, J= 13.6 Hz), 7.76-7.67 (4H, m), 7.46 (1H, t), 7.33 (1H, d, J= 7.6 Hz), 7.07 (1H, t), 7.00 (1H, t, J= 14.8 Hz), 6.07 (2H, s), 5.91 (2H, d, J= 11.2 Hz), 4.83 (2H, d), 3.96-3.90 (2H, m), 2.99 (2H, d). <sup>13</sup>C NMR (100 MHz, DMSO):  $\delta$  = 164.73, 164.53, 148.11, 144.69, 141.80, 141.74, 136.66, 136.39, 132.69, 132.64, 130.83, 130.80, 130.76, 130.26, 129.85, 129.78, 127.41, 127.31, 126.91, 126.79, 124.58, 121.55, 121.44, 119.12, 118.04, 114.71, 114.63, 114.20, 111.58, 107.66, 107.04, 49.55, 48.94, 21.82, 21.01. HRMS (ESI-TOF)  $m/z$  Calcd for C<sub>27</sub>H<sub>24</sub>BrN<sub>5</sub>O<sub>3</sub> [M-Br]<sup>+</sup> 466.1873. found 466.1871.

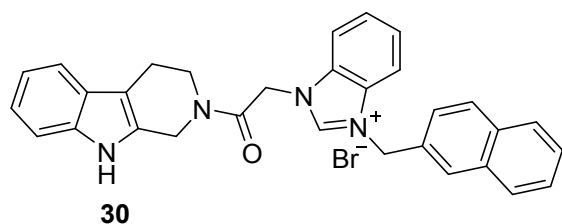

3-(naphthalen-2-ylmethyl)-1-(2-oxo-2-(1,3,4,9-tetrahydro-2H-pyrido[3,4-b]indol-2-yl)ethyl)-1H-benzo[d]imidazol-3-ium bromide

Yield 76%. Yellow solid. Mp 272-273 °C. IR  $\nu_{\max}$  (cm<sup>-1</sup>): 3703.56, 3274.28, 3116.03, 3056.46, 2972.08, 2927.07, 2860.44, 2314.51, 1955.55, 1922.65, 1828.18, 1655.36, 1559.56, 1431.58, 1370.52, 1321.18, 1179.82, 860.11, 818.21, 744.11, 474.59. <sup>1</sup>H NMR (400 MHz, DMSO):  $\delta$  = 11.07-10.93 (1H, d), 9.91-9.88 (1H, d), 8.12-7.93 (7H, m), 7.68-7.56 (6H, m), 7.47-7.32 (2H, m), 6.06-6.04 (2H, d), 5.93-5.90 (2H, d), 4.90-4.75 (2H, d), 3.94-3.89 (2H, t), 2.98-2.76 (2H, d). <sup>13</sup>C NMR (100 MHz, DMSO):  $\delta$  =

165.30, 165.08, 144.81, 137.14, 136.84, 133.70, 133.65, 133.17, 132.21, 131.47, 131.25, 129.86, 128.80, 128.65, 128.58, 127.76, 127.62, 126.54, 122.00, 121.89, 119.58, 118.51, 115.02, 114.82, 112.05, 108.13, 107.52, 51.07, 49.38, 49.17, 43.91, 43.22, 40.86, 40.66, 40.45, 40.24, 40.03, 22.29, 21.47. HRMS (ESI-TOF)  $m/z$  Calcd for  $C_{31}H_{27}BrN_4O$   $[M-Br]^+$  471.2179. found 471.2176.

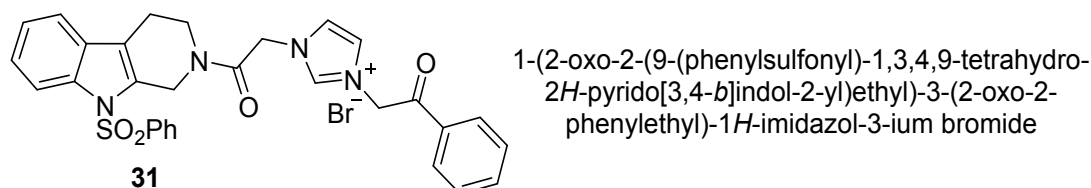

Yield 89%. Yellow solid. Mp 222-223 °C. IR  $\nu_{max}$  ( $cm^{-1}$ ): 3873.54, 3729.78, 3396.85, 3359.58, 3149.29, 3094.30, 3055.49, 2973.11, 2933.63, 2314.14, 2009.53, 1934.15, 1897.58, 1803.97, 1758.75, 1692.11, 1653.28, 1568.79, 1412.74, 1367.21, 1301.87, 1226.12, 1176.29, 995.51, 964.07, 793.55, 755.22, 678.68, 603.14, 565.09.  $^1H$  NMR (400 MHz, DMSO):  $\delta$  = 9.11 (1H, s), 8.09-8.03 (4H, m), 7.91 (1H, d,  $J$  = 7.6 Hz), 7.79 (3H, d,  $J$  = 9.6 Hz), 7.69-7.53 (6H, m), 7.37-7.31 (2H, m), 6.18 (2H, s), 5.71 (2H, d), 5.08 (2H, s), 3.86 (2H, s), 2.91 (1H, s), 2.08 (1H, s).  $^{13}C$  NMR (100 MHz, DMSO):  $\delta$  = 191.77, 165.18, 139.10, 137.46, 135.56, 135.26, 134.97, 134.20, 131.08, 130.47, 129.57, 129.47, 128.63, 127.18, 126.80, 125.46, 124.41, 124.32, 123.91, 119.46, 117.93, 114.21, 56.06, 51.02, 31.17, 21.72. HRMS (ESI-TOF)  $m/z$  Calcd for  $C_{30}H_{27}BrN_4O_4S$   $[M-Br]^+$  539.1747. found 539.1746. Anal. Calcd for  $C_{30}H_{27}BrN_4O_4S$ : C 58.16, H 4.39, N 9.04; Found: C 58.60, H 4.39, N 9.12.

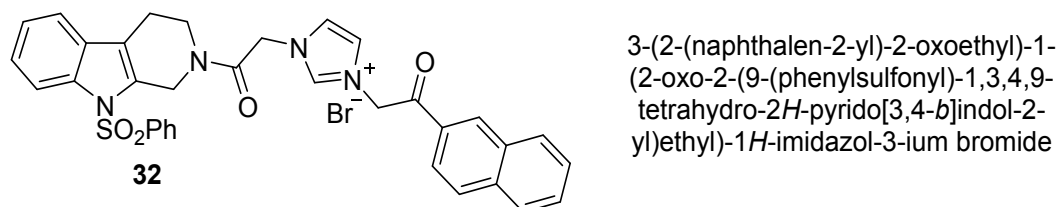

Yield 86%. Yellow solid. Mp 195-196 °C. IR  $\nu_{max}$  ( $cm^{-1}$ ): 3470.30, 3392.33, 3161.56, 3122.50, 3066.33, 3000.48, 2968.98, 2911.92, 2407.12, 2387.40, 2314.59, 1919.57, 1700.57, 1659.42, 1564.70, 1439.46, 1366.77, 1221.92, 1178.35, 798.89, 753.45,



689.59, 602.83, 563.66, 484.63. <sup>1</sup>H NMR (400 MHz, DMSO): δ = 8.22 (1H, d, J= 8.0 Hz), 8.15 (1H, d, J= 8.0 Hz), 8.09-8.03 (5H, m), 7.99-7.90 (5H, m), 7.64-7.51 (3H, m), 7.38 (1H, t, J= 15.2 Hz), 7.31 (1H, t, J= 14.0 Hz), 6.29 (2H, s), 5.76-5.65 (2H, m), 5.09 (2H, s), 3.91-3.85 (2H, m), 2.91 (2H, d). <sup>13</sup>C NMR (100 MHz, DMSO): δ = 191.67, 165.20, 139.16, 137.48, 136.00, 135.56, 135.27, 132.51, 131.51, 131.09, 130.94, 130.14, 129.82, 129.47, 129.27, 128.37, 127.89, 126.80, 125.47, 124.41, 123.97, 123.67, 119.46, 117.91, 114.22, 56.08, 51.02, 21.72. HRMS (ESI-TOF) *m/z* Calcd for C<sub>34</sub>H<sub>29</sub>BrN<sub>4</sub>O<sub>4</sub>S [M-Br]<sup>+</sup> 589.1904. found 589.1904.

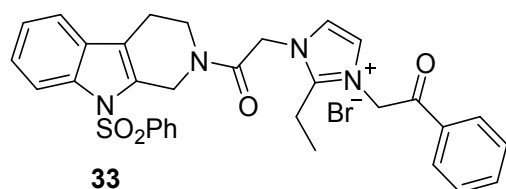

2-ethyl-1-(2-oxo-2-(9-(phenylsulfonyl)-1,3,4,9-tetrahydro-2H-pyrido[3,4-b]indol-2-yl)ethyl)-3-(2-oxo-2-phenylethyl)-1H-imidazol-3-ium bromide

Yield 86%. Yellow solid. Mp 272-273 °C. IR  $\nu_{\max}$  (cm<sup>-1</sup>): 3833.26, 3729.72, 3643.81, 3395.33, 3176.84, 3137.42, 3057.15, 3044.79, 2975.39, 2925.05, 2666.32, 2386.47, 2314.07, 1955.94, 1907.55, 1759.04, 1690.49, 1652.76, 1522.40, 1450.92, 1415.38, 1368.82, 1232.28, 1178.60, 960.99, 888.28, 757.16, 683.78, 601.26, 563.63. <sup>1</sup>H NMR (400 MHz, DMSO): δ = 8.10 (2H, d, J= 7.2 Hz), 8.03 (1H, t, J= 14.8 Hz), 7.90 (1H, d, J= 7.6 Hz), 7.78 (1H, d, J= 7.2 Hz), 7.71-7.54 (9H, m), 7.38-7.29 (2H, m), 6.14 (2H, s), 5.64 (2H, d, J= 13.6 Hz), 5.08 (2H, d, J= 9.6 Hz), 3.87 (2H, d, J= 5.2 Hz), 3.02 (2H, d, J= 7.6 Hz), 2.93 (2H, s), 1.04 (3H, t, J= 15.2 Hz). <sup>13</sup>C NMR (100 MHz, DMSO): δ = 191.98, 165.02, 150.64, 137.44, 135.59, 135.25, 135.01, 134.23, 130.98, 130.44, 129.47, 128.86, 127.15, 126.79, 125.48, 124.44, 123.57, 123.14, 119.46, 117.97, 114.26, 54.96, 21.70, 16.48, 11.83, 77.76. HRMS (ESI-TOF) *m/z* Calcd for C<sub>32</sub>H<sub>30</sub>BrN<sub>4</sub>O<sub>4</sub>S [M-Br]<sup>+</sup> 567.2060. found 567.2060. Anal. Calcd for C<sub>32</sub>H<sub>31</sub>BrN<sub>4</sub>O<sub>4</sub>S: C 59.35, H 4.83, N 8.65; Found: C 59.50, H 4.58, N 8.62.

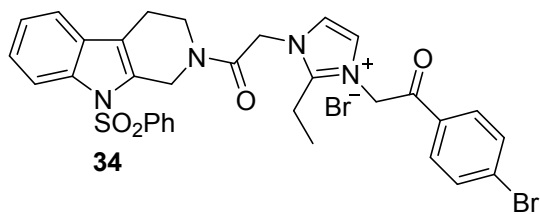

3-(2-(4-bromophenyl)-2-oxoethyl)-2-ethyl-1-(2-oxo-2-(9-(phenylsulfonyl)-1,3,4,9-tetrahydro-2H-pyrido[3,4-b]indol-2-yl)ethyl)-1H-imidazol-3-ium bromide

Yield 89%. Yellow solid. Mp 279-280 °C. IR  $\nu_{\max}$  (cm<sup>-1</sup>): 3369.77, 3137.68, 3055.29, 3023.94, 2976.87, 2936.13, 1940.53, 1695.79, 1653.20, 1578.64, 1521.15, 1451.09, 1412.19, 1367.01, 1223.09, 1177.02, 1077.14, 1059.07, 996.87, 959.62, 882.71, 823.75, 756.99, 672.12, 599.95, 561.05. <sup>1</sup>H NMR (400 MHz, DMSO):  $\delta$  = 8.04-7.88 (7H, m), 7.71-7.53 (6H, m), 7.39-7.29 (2H, m), 6.11 (2H, s), 5.63 (2H, d, J= 14.4 Hz), 5.08 (2H, d, J= 9.2 Hz), 3.87 (2H, d, J= 5.2 Hz), 3.01 (2H, d, J= 7.2 Hz), 2.93 (2H, s), 1.03 (3H, t). <sup>13</sup>C NMR (100 MHz, DMSO):  $\delta$  = 191.37, 165.00, 150.66, 137.44, 135.59, 135.25, 133.32, 132.54, 130.98, 130.81, 130.44, 129.49, 129.11, 127.14, 126.78, 125.48, 124.44, 123.59, 123.10, 119.46, 117.96, 114.26, 54.88, 49.86, 21.70, 16.47, 11.85, 11.78. HRMS (ESI-TOF)  $m/z$  Calcd for C<sub>32</sub>H<sub>30</sub>Br<sub>2</sub>N<sub>4</sub>O<sub>4</sub>S [M-Br]<sup>+</sup> 645.1165. found 645.1164. Anal. Calcd for C<sub>32</sub>H<sub>30</sub>Br<sub>2</sub>N<sub>4</sub>O<sub>4</sub>S: C 52.91, H 4.16, N 7.71; Found: C 52.75, H 4.26, N 7.90.

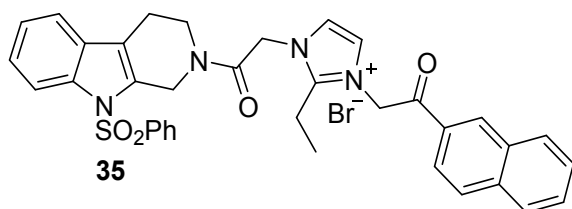

2-ethyl-3-(2-(naphthalen-2-yl)-2-oxoethyl)-1-(2-oxo-2-(9-(phenylsulfonyl)-1,3,4,9-tetrahydro-2H-pyrido[3,4-b]indol-2-yl)ethyl)-1H-imidazol-3-ium bromide

Yield 78%. Yellow solid. Mp 273-274 °C. IR  $\nu_{\max}$  (cm<sup>-1</sup>): 3399.10, 3053.33, 3047.20, 3018.90, 2926.89, 2358.20, 2314.82, 1931.80, 1783.96, 1691.05, 1654.22, 1584.53, 1523.44, 1461.05, 1373.80, 1222.50, 1180.27, 1086.23, 957.33, 755.42, 677.71, 604.22, 561.60. <sup>1</sup>H NMR (400 MHz, DMSO):  $\delta$  = 8.86 (1H, s), 8.21 (1H, d, J= 8 Hz), 8.15 (1H, d, J= 8.4 Hz), 8.09-7.89 (5H, m), 7.73-7.54 (8H, m), 6.26 (2H, s), 5.64 (2H, d), 5.08 (2H, s), 3.78 (2H, s), 3.06 (2H, s), 2.93 (2H, s), 1.10-1.05 (3H, m). <sup>13</sup>C NMR (100 MHz, DMSO):  $\delta$  = 191.88, 165.03, 150.68, 137.45, 136.01, 135.59, 135.26, 132.45, 131.57, 131.22, 130.99, 130.45, 130.11, 129.83, 129.49, 129.14, 128.38, 127.91, 127.14, 126.79, 125.50, 124.44, 123.85, 123.62, 123.21, 119.47, 117.96,

114.27, 54.96, 49.85, 21.70. 16.50, 11.80. HRMS (ESI-TOF)  $m/z$  Calcd for  $C_{36}H_{33}BrN_4O_4S$   $[M-Br]^+$  617.2217. found 617.2216.

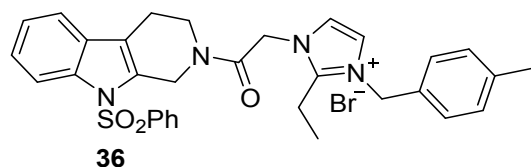

2-ethyl-3-(4-methylbenzyl)-1-(2-oxo-2-(9-(phenylsulfonyl)-1,3,4,9-tetrahydro-2H-pyrido[3,4-b]indol-2-yl)ethyl)-1H-imidazol-3-ium bromide

Yield 81%. Yellow solid. Mp 244-245 °C. IR  $\nu_{max}$  ( $cm^{-1}$ ): 3729.06, 3631.84, 3392.44, 3162.53, 3088.99, 3051.37, 2981.70, 2933.56, 2860.48, 2387.69, 2315.06, 1905.57, 1793.26, 1662.77, 1579.47, 1512.96, 1435.32, 1412.93, 1369.44, 1300.47, 1222.29, 1177.77, 1152.43, 963.10, 821.85, 754.52, 691.60, 606.20, 588.19, 566.29, 489.54.  $^1H$  NMR (400 MHz, DMSO):  $\delta$  = 8.01-7.85 (3H, m), 7.70-7.49 (6H, m), 7.35-7.22 (6H, m), 5.50 (4H, t), 5.04 (2H, d,  $J$  = 9.6 Hz), 3.86-3.81 (2H, m), 3.13-3.01 (2H, m), 2.69 (2H, s), 2.31 (3H, s).  $^{13}C$  NMR (100 MHz, DMSO):  $\delta$  = 165.69, 150.48, 150.31, 139.29, 139.24, 138.25, 138.19, 136.40, 135.85, 135.79, 132.78, 131.63, 131.37, 131.02, 130.99, 130.73, 130.22, 130.12, 128.75, 128.66, 127.76, 127.45, 126.09, 125.07, 124.55, 124.43, 122.69, 120.03, 119.43, 118.64, 114.98, 80.33, 80.00, 79.67, 22.33, 21.68, 21.60, 17.46, 12.18, 12.09. HRMS (ESI-TOF)  $m/z$  Calcd for  $C_{32}H_{33}BrN_4O_3S$   $[M-Br]^+$  553.2267. found 553.2265. Anal. Calcd for  $C_{32}H_{33}BrN_4O_3S$ : C 60.66, H 5.25, N 8.84; Found: C 60.50, H 5.09, N 9.02.

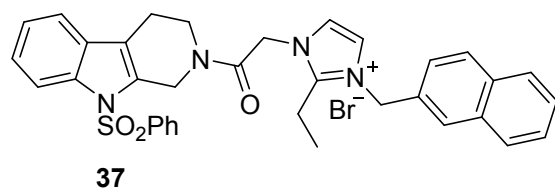

2-ethyl-3-(naphthalen-2-ylmethyl)-1-(2-oxo-2-(9-(phenylsulfonyl)-1,3,4,9-tetrahydro-2H-pyrido[3,4-b]indol-2-yl)ethyl)-1H-imidazol-3-ium bromide

Yield 87%. Yellow solid. Mp 253-254 °C. IR  $\nu_{max}$  ( $cm^{-1}$ ): 3873.86, 3729.92, 3579.06, 3401.33, 3146.73, 3037.64, 3036.41, 2996.52, 2946.23, 2904.79, 2660.03, 2536.06, 2314.30, 1948.99, 1810.66, 1757.68, 1661.31, 518.44, 1440.92, 1363.44, 1215.85, 1179.70, 874.86, 753.70, 602.31, 564.49, 483.68.  $^1H$  NMR (400 MHz, DMSO):  $\delta$  = 8.01-7.83 (8H, m), 7.69-7.45 (8H, m), 7.37-7.28 (2H, m), 5.70 (2H, s), 5.58 (2H, d), 5.06 (2H, d,  $J$  = 10.4 Hz), 3.84 (2H, s), 3.10 (2H, d,  $J$  = 6.8 Hz), 2.91 (2H, s), 1.03-0.95

(3H, m).  $^{13}\text{C}$  NMR (100 MHz, DMSO):  $\delta = 165.05, 149.81, 137.42, 135.58, 135.21, 133.20, 133.08, 132.72, 130.95, 130.44, 130.39, 129.48, 129.35, 128.27, 127.31, 127.23, 127.12, 126.92, 126.77, 125.60, 125.49, 124.43, 124.01, 122.23, 119.45, 117.95, 114.26, 51.35, 49.80, 21.66, 16.81, 11.73, 11.61$ . HRMS (ESI-TOF)  $m/z$  Calcd for  $\text{C}_{35}\text{H}_{33}\text{BrN}_4\text{O}_3\text{S}$   $[\text{M}+1]^+$  589.2267. found 589.2267.

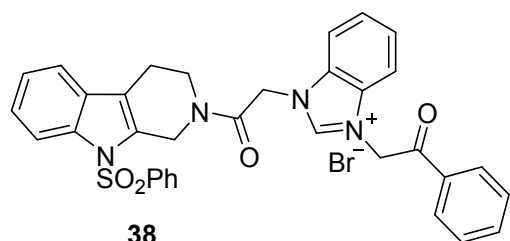

1-(2-oxo-2-(9-(phenylsulfonyl)-1,3,4,9-tetrahydro-2H-pyrido[3,4-b]indol-2-yl)ethyl)-3-(2-oxo-2-phenylethyl)-1H-benzo[d]imidazol-3-ium bromide

**38**

Yield 86%. Yellow solid. Mp 200-201 °C. IR  $\nu_{\text{max}}$  ( $\text{cm}^{-1}$ ): 3611.88, 3399.75, 3014.40, 2967.24, 2920.78, 2315.42, 1816.28, 1698.03, 1657.45, 1566.02, 1483.95, 1441.11, 1372.90, 1299.79, 1228.24, 1181.92, 1152.37, 1088.37, 992.59, 960.65, 893.04, 755.05, 683.31, 602.66, 588.05, 565.04.  $^1\text{H}$  NMR (400 MHz, DMSO):  $\delta = 8.05\text{-}7.8$  (9H,m), 7.57 (6H, t), 7.46 (2H, s), 7.36-7.28 (2H,m), 5.96 (4H, s), 5.18-5.08 (2H, m), 3.97 (1H, s), 3.31 (1H, d,  $J=7.6$  Hz), 2.78 (2H, s).  $^{13}\text{C}$  NMR (100 MHz, DMSO):  $\delta = 164.59, 138.32, 136.19, 134.93, 134.78, 133.72, 133.57, 131.36, 130.77, 130.62, 130.24, 130.10, 129.89, 129.57, 128.52, 128.29, 127.68, 127.58, 127.45, 127.09, 126.84, 125.84, 125.50, 124.42, 119.16, 117.64, 114.64, 114.51, 114.14, 51.51, 49.32, 49.11, 49.01, 48.90, 48.82, 48.69, 48.47, 22.30, 21.31$ . HRMS (ESI-TOF)  $m/z$  Calcd for  $\text{C}_{34}\text{H}_{29}\text{BrN}_4\text{O}_4\text{S}$   $[\text{M}-\text{Br}]^+$  639.1904. found 639.1903.

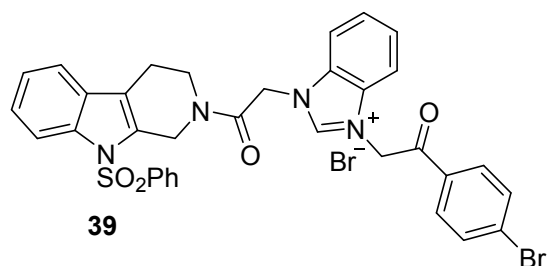

**39**

3-(2-(4-bromophenyl)-2-oxoethyl)-1-(2-oxo-2-(9-(phenylsulfonyl)-1,3,4,9-tetrahydro-2H-pyrido[3,4-b]indol-2-yl)ethyl)-1H-benzo[d]imidazol-3-ium bromide

Yield 75%. Yellow solid. Mp 197-198 °C. IR  $\nu_{\text{max}}$  ( $\text{cm}^{-1}$ ): 3874.44, 3729.21, 3390.00, 3052.81, 3015.65, 2967.72, 2922.05, 2672.15, 2587.67, 2314.31, 1953.03, 1920.51,

1810.95, 1698.58, 1656.15, 1575.20, 1484.00, 1440.11, 1370.22, 1228.38, 1181.09, 1080.47, 993.52, 894.09, 823.86, 755.78, 690.05, 603.01, 587.87, 564.12. <sup>1</sup>H NMR (400 MHz, DMSO): δ = 9.64 (1H, t), 8.11-8.03 (6H, m), 7.93-7.88 (3H, m), 7.71-7.56 (6H, m), 7.38-7.32 (2H, m), 6.47 (2H, s), 5.98 (2H, s), 5.13 (2H, d), 3.95 (2H, s), 3.38 (3H, d, J= 11.6 Hz), 2.98 (2H, s). <sup>13</sup>C NMR (100 MHz, DMSO): δ = 164.77, 145.04, 137.49, 135.60, 135.24, 133.34, 132.62, 132.09, 131.98, 130.97, 130.84, 130.44, 129.48, 129.17, 127.15, 126.78, 125.47, 124.41, 119.47, 117.95, 114.49, 114.42, 114.23, 79.79, 79.46, 79.13, 67.48, 60.21, 25.59, 21.75, 14.55. HRMS (ESI-TOF) *m/z* Calcd for C<sub>34</sub>H<sub>28</sub>Br<sub>2</sub>N<sub>4</sub>O<sub>4</sub>S [M-Br]<sup>+</sup> 667.1009. found 667.1010. Anal. Calcd for C<sub>34</sub>H<sub>28</sub>Br<sub>2</sub>N<sub>4</sub>O<sub>4</sub>S: C 54.56, H 3.77, N 7.49; Found: C 54.05, H 3.85, N 7.60.

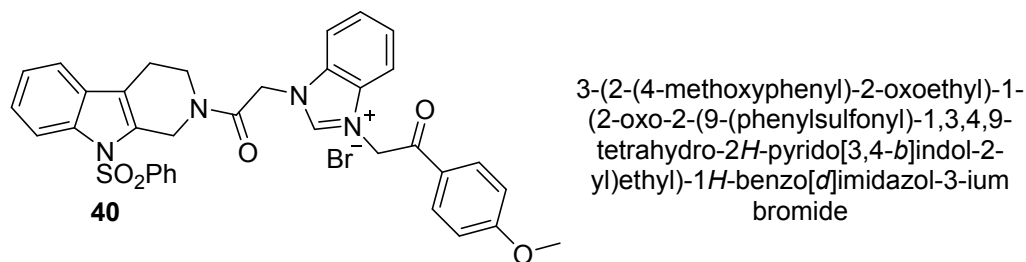

Yield 89%. Yellow solid. Mp 209-210 °C. IR  $\nu_{\max}$  (cm<sup>-1</sup>): 3397.65, 3126.41, 3010.29, 2973.73, 2933.01, 2846.23, 1811.70, 1697.41, 1656.47, 1606.07, 1564.15, 1519.44, 1440.62, 1419.28, 1375.46, 1259.06, 1232.07, 1180.69, 1086.02, 1031.74, 895.31, 845.57, 756.66, 566.52. <sup>1</sup>H NMR (400 MHz, DMSO): δ = 9.65 (1H, d), 8.13-8.03 (6H, m), 7.89 (1H, d, J= 7.6 Hz), 7.73-7.54 (6H, m), 7.40-7.30 (2H, m), 7.20 (2H, d, J= 8.8 Hz), 6.45 (2H, s), 6.02 (2H, d), 5.14 (2H, d), 3.94 (3H, d), 2.99 (2H, s), 2.08 (2H, s). <sup>13</sup>C NMR (100 MHz, DMSO): δ = 189.83, 164.80, 164.68, 145.09, 137.44, 135.64, 135.57, 135.27, 132.22, 132.09, 132.01, 131.36, 130.97, 130.77, 130.46, 129.49, 127.14, 127.07, 126.79, 125.49, 124.43, 119.49, 117.97, 114.80, 114.48, 114.36, 114.23, 56.29, 53.43, 48.78, 31.17, 21.75. HRMS (ESI-TOF) *m/z* Calcd for C<sub>35</sub>H<sub>31</sub>BrN<sub>4</sub>O<sub>5</sub>S [M-Br]<sup>+</sup> 619.2009. found 619.2008. Anal. Calcd for C<sub>35</sub>H<sub>31</sub>BrN<sub>4</sub>O<sub>5</sub>S: C 60.09, H 4.47, N 8.01; Found: C 60.08, H 4.34, N 8.20.

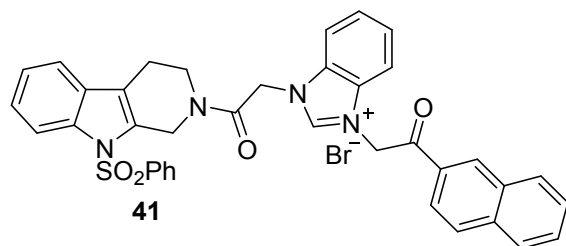

3-(2-(naphthalen-2-yl)-2-oxoethyl)-1-(2-oxo-2-(9-(phenylsulfonyl)-1,3,4,9-tetrahydro-2H-pyrido[3,4-b]indol-2-yl)ethyl)-1H-benzo[d]imidazol-3-ium bromide

Yield 77%. Yellow solid. Mp 214-215 °C. IR  $\nu_{\max}$  (cm<sup>-1</sup>): 3729.41, 3378.09, 3062.82, 3051.26, 3019.38, 2980.10, 2928.76, 2667.24, 2386.34, 2313.55, 1926.53, 1809.47, 1696.56, 1658.33, 1621.81, 1563.70, 1482.29, 1439.78, 1367.69, 1224.74, 1179.81, 1087.08, 995.03, 754.82, 690.01, 604.36, 587.74, 566.11. <sup>1</sup>H NMR (400 MHz, DMSO):  $\delta$  = 9.68 (1H, d), 8.93 (1H, s), 8.25-8.03 (8H, m), 7.90-7.54 (10H, m), 7.40-7.30 (2H, m), 6.36 (2H, s), 6.03 (2H, d), 5.14 (2H, d), 3.93 (2H, d), 2.99 (2H, s). <sup>13</sup>C NMR (100 MHz, DMSO):  $\delta$  = 191.98, 165.27, 137.95, 136.52, 136.06, 135.73, 132.97, 132.61, 132.53, 132.05, 131.45, 130.93, 129.96, 129.68, 128.86, 128.39, 127.62, 127.26, 125.96, 124.89, 124.31, 119.96, 118.43, 114.98, 114.71, 54.34, 49.28, 22.22. HRMS (ESI-TOF)  $m/z$  Calcd for C<sub>38</sub>H<sub>31</sub>BrN<sub>4</sub>O<sub>4</sub>S [M-Br]<sup>+</sup> 639.2060. found 639.2058. Anal. Calcd for C<sub>35</sub>H<sub>31</sub>BrN<sub>4</sub>O<sub>5</sub>S: C 60.09, H 4.47, N 8.01; Found: C 60.08, H 4.34, N 8.20.

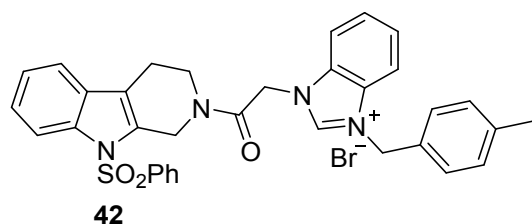

3-(4-methylbenzyl)-1-(2-oxo-2-(9-(phenylsulfonyl)-1,3,4,9-tetrahydro-2H-pyrido[3,4-b]indol-2-yl)ethyl)-1H-benzo[d]imidazol-3-ium bromide

Yield 84%. Yellow solid. Mp 290-291 °C. IR  $\nu_{\max}$  (cm<sup>-1</sup>): 3874.15, 3832.88, 3729.67, 3393.33, 3134.04, 3077.05, 3066.32, 3021.59, 2924.11, 2410.07, 2314.50, 2009.68, 1907.43, 1819.17, 1782.54, 1664.02, 1567.21, 1439.56, 1421.17, 1369.17, 1351.67, 1297.92, 1265.57, 1228.37, 1177.30, 1163.18, 1086.99, 962.87, 784.34, 728.86, 683.47, 605.03, 565.05. <sup>1</sup>H NMR (400 MHz, DMSO):  $\delta$  = 9.81 (1H, s), 8.04 (4H, t), 7.88 (1H, d), 7.34-7.24 (12H, m), 5.96-5.83 (4H, m), 5.12 (2H, d), 3.91 (2H, d), 2.97 (2H, s), 2.29 (3H, s). <sup>13</sup>C NMR (100 MHz, DMSO):  $\delta$  = 164.88, 144.00, 138.81, 137.44, 135.58, 135.24, 132.65, 131.27, 130.98, 130.88, 130.43, 130.09, 129.47,

128.87, 128.79, 127.24, 126.80, 125.48, 124.42, 119.48, 117.95, 114.55, 114.37, 114.23, 50.22, 48.65, 21.75, 21.19. HRMS (ESI-TOF)  $m/z$  Calcd for  $C_{34}H_{31}BrN_4O_3S$   $[M-Br]^+$  575.2111. found 575.2113. Anal. Calcd for  $C_{34}H_{31}BrN_4O_3S$ : C 62.29, H 4.77, N 8.55; Found: C 62.05, H 4.37, N 8.62.

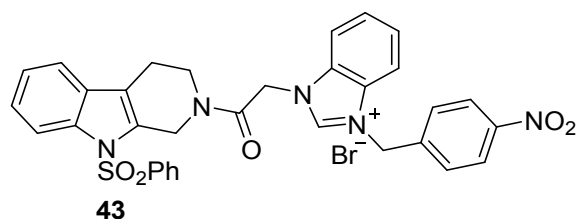

3-(4-nitrobenzyl)-1-(2-oxo-2-(9-(phenylsulfonyl)-1,3,4,9-tetrahydro-2H-pyrido[3,4-b]indol-2-yl)ethyl)-1H-benzo[d]imidazol-3-ium bromide

**43**

Yield 86%. Yellow solid. Mp 272-273 °C. IR  $\nu_{max}$  ( $cm^{-1}$ ): 3873.55, 3832.65, 3729.61, 3105.66, 3026.50, 2982.57, 2907.93, 2846.96, 2750.14, 2670.88, 2601.40, 2452.74, 2390.21, 2314.20, 1997.64, 1921.28, 1796.87, 1650.10, 1610.43, 1560.29, 1521.44, 1417.55, 1377.58, 1352.51, 1226.03, 1178.17, 1156.04, 965.82, 855.20, 800.33, 754.71, 715.41, 681.23, 601.98, 562.41.  $^1H$  NMR (400 MHz, DMSO):  $\delta$  = 7.94-7.88 (1H, m), 7.81-7.76 (4H, m), 7.63-7.29 (8H, m), 7.27-7.19 (2H, m), 5.92 (2H, s), 5.09 (2H, s), 4.56 (2H, s), 3.91 (2H, t,  $J=11.6$  Hz), 2.91 (2H, s).  $^{13}C$  NMR (100 MHz, DMSO):  $\delta$  = 166.55, 150.48, 142.82, 142.78, 139.94, 138.12, 136.60, 136.47, 134.78, 133.06, 132.54, 131.78, 131.69, 131.55, 131.26, 131.20, 129.51, 129.46, 129.36, 128.74, 128.54, 127.17, 127.05, 126.27, 126.10, 120.89, 120.80, 119.81, 116.25, 116.14, 115.96, 115.63, 23.53. HRMS (ESI-TOF)  $m/z$  Calcd for  $C_{33}H_{28}BrN_5O_5S$   $[M-Br]^+$  606.1805. found 606.1803.

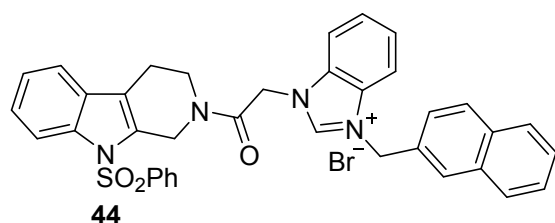

3-(naphthalen-2-ylmethyl)-1-(2-oxo-2-(9-(phenylsulfonyl)-1,3,4,9-tetrahydro-2H-pyrido[3,4-b]indol-2-yl)ethyl)-1H-benzo[d]imidazol-3-ium bromide

**44**

Yield 72%. Yellow solid. Mp 136-137 °C. IR  $\nu_{max}$  ( $cm^{-1}$ ): 3874.14, 3832.84, 3729.56, 3601.40, 3388.56, 3132.48, 2976.93, 2902.35, 2386.58, 2314.99, 2255.34, 2187.56, 1915.46, 1817.10, 1795.15, 1700.69, 1660.57, 1563.29, 1439.36, 1368.17, 1226.34, 1179.47, 1084.82, 957.64, 752.69, 718.07, 681.37, 602.30, 588.21, 563.07.  $^1H$  NMR

(400 MHz, DMSO):  $\delta$  = 10.41 (1H, s), 8.00-7.95 (5H, m), 7.78 (2H, s), 7.50-7.18 (13H, m), 6.35 (2H, d), 6.11 (2H, s), 3.81 (2H, d), 2.94-2.85 (2H, m).  $^{13}\text{C}$  NMR (100 MHz, DMSO):  $\delta$  = 189.92, 163.84, 162.53, 143.92, 137.92, 135.88, 134.73, 133.95, 133.29, 131.93, 131.33, 129.83, 129.72, 129.46, 129.21, 129.08, 128.55, 127.19, 127.08, 126.99, 126.82, 126.34, 124.97, 124.81, 123.79, 118.81, 118.68, 117.33, 114.38, 114.05, 113.88, 113.17, 112.96, 53.59, 49.45, 49.13, 43.97, 42.68, 42.17, 39.71, 36.46, 31.41, 30.91, 22.10, 20.59. HRMS (ESI-TOF)  $m/z$  Calcd for  $\text{C}_{37}\text{H}_{31}\text{BrN}_4\text{O}_3\text{S}$   $[\text{M}-\text{Br}]^+$  611.2073. found 611.2073.

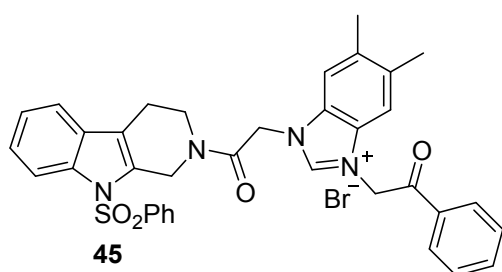

5,6-dimethyl-1-(2-oxo-2-(9-(phenylsulfonyl)-1,3,4,9-tetrahydro-2H-pyrido[3,4-b]indol-2-yl)ethyl)-3-(2-oxo-2-phenylethyl)-1H-benzo[d]imidazol-3-ium bromide

Yield 91%. Yellow solid. Mp 239-240 °C. IR  $\nu_{\text{max}}$  ( $\text{cm}^{-1}$ ): 3729.60, 3390.26, 3121.27, 3055.00, 3007.50, 2974.01, 2901.43, 2410.55, 2314.60, 1961.08, 1913.30, 1791.30, 1703.27, 1700.74, 1658.66, 1564.82, 1443.25, 1378.63, 1223.38, 1180.06, 962.61, 880.94, 796.83, 756.58, 692.09, 605.72, 563.76.  $^1\text{H}$  NMR (400 MHz, DMSO):  $\delta$  = 8.12-7.95 (3H, m), 7.85-7.75 (2H, m), 7.68-7.55 (7H, m), 7.50-7.30 (5H, m), 5.17 (2H, s), 4.01 (2H, t,  $J$  = 11.6 Hz), 3.34 (3H, s), 3.01 (2H, s), 2.44 (6H, s).  $^{13}\text{C}$  NMR (100 MHz, DMSO):  $\delta$  = 192.71, 166.73, 140.03, 139.66, 138.32, 136.67, 136.39, 136.22, 136.08, 132.75, 132.61, 132.39, 131.62, 131.59, 131.46, 131.08, 130.40, 128.64, 128.45, 126.89, 125.99, 120.72, 120.61, 119.83, 116.26, 115.08, 114.93, 23.52, 21.36, 21.33. HRMS (ESI-TOF)  $m/z$  Calcd for  $\text{C}_{36}\text{H}_{33}\text{BrN}_4\text{O}_4\text{S}$   $[\text{M}-\text{Br}]^+$  617.2217. found 617.2216.



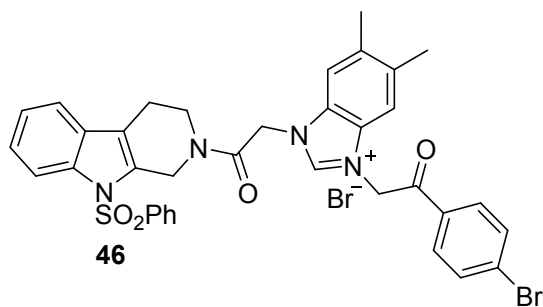

3-(2-(4-bromophenyl)-2-oxoethyl)-5,6-dimethyl-1-(2-oxo-2-(9-(phenylsulfonyl)-1,3,4,9-tetrahydro-2H-pyrido[3,4-b]indol-2-yl)ethyl)-1H-benzo[d]imidazol-3-ium bromide

Yield 88%. Yellow solid. Mp 250-252 °C. IR  $\nu_{\max}$  (cm<sup>-1</sup>): 3729.23, 3397.11, 3127.34, 3055.27, 2943.04, 2784.12, 2580.89, 2314.22, 1913.09, 1794.21, 1702.52, 1661.33, 1575.12, 1484.52, 1441.25, 1226.07, 1179.79, 1007.36, 963.16, 828.57, 755.75, 606.68, 564.11. <sup>1</sup>H NMR (400 MHz, DMSO):  $\delta$  = 9.47 (1H, s), 8.05 (4H, t), 7.92-7.84 (5H, m), 7.73-7.40 (4H, m), 7.38-7.30 (2H, m), 6.41 (2H, s), 5.94 (2H, d), 5.12 (2H, d), 3.91 (2H, t), 2.98 (2H, s), 2.41 (6H, d). <sup>13</sup>C NMR (100 MHz, DMSO):  $\delta$  = 191.04, 164.84, 143.77, 137.46, 137.37, 136.85, 136.57, 135.25, 133.34, 132.60, 130.98, 130.83, 130.62, 130.48, 130.45, 129.47, 129.13, 127.16, 126.79, 125.47, 124.42, 119.48, 118.69, 117.95, 114.23, 113.84, 79.80, 79.46, 79.13, 53.70, 31.17, 21.74, 20.45. HRMS (ESI-TOF)  $m/z$  Calcd for C<sub>36</sub>H<sub>32</sub>Br<sub>2</sub>N<sub>4</sub>O<sub>4</sub>S [M-Br]<sup>+</sup> 695.1322. found 695.1324.

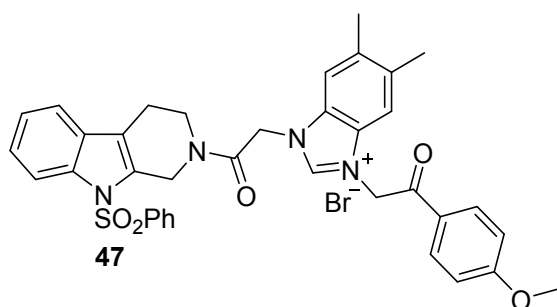

3-(2-(4-methoxyphenyl)-2-oxoethyl)-5,6-dimethyl-1-(2-oxo-2-(9-(phenylsulfonyl)-1,3,4,9-tetrahydro-2H-pyrido[3,4-b]indol-2-yl)ethyl)-1H-benzo[d]imidazol-3-ium bromide

Yield 90%. Yellow solid. Mp 244-245 °C. IR  $\nu_{\max}$  (cm<sup>-1</sup>): 3407.32, 3128.16, 3054.10, 2914.73, 2784.27, 1663.66, 1604.87, 1664.90, 1372.20, 1235.23, 1179.39, 1022.82, 963.70, 838.29, 756.09, 604.34, 563.77. <sup>1</sup>H NMR (400 MHz, DMSO):  $\delta$  = 9.55 (1H, d), 8.08 (2H, d, J = 8.8 Hz), 8.06-7.86 (5H, m), 7.68-7.56 (4H, m), 7.39-7.29 (2H, m), 7.19 (2H, d, J = 8.4 Hz), 6.41 (2H, s), 5.98 (2H, d), 5.13 (2H, d), 3.93 (5H, t), 2.98 (2H, s), 2.40 (6H, t). <sup>13</sup>C NMR (100 MHz, DMSO):  $\delta$  = 189.88, 164.89, 164.65, 143.84, 137.47, 136.79, 136.75, 135.59, 135.24, 131.34, 131.00, 130.64, 130.53, 130.45,

129.49, 127.19, 127.11, 126.78, 125.46, 124.42, 119.48, 117.98, 114.77, 114.22, 113.79, 56.28, 53.33, 48.64, 21.76, 20.44, 20.41. HRMS (ESI-TOF)  $m/z$  Calcd for  $C_{37}H_{35}BrN_4O_5S$   $[M+1]^+$  647.2322. found 647.2324.

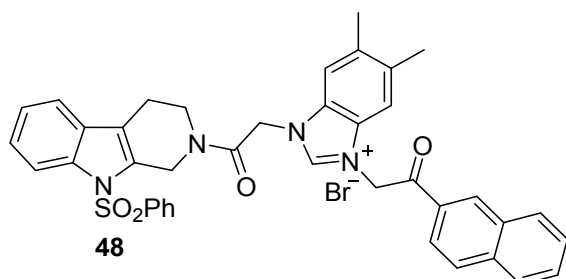

5,6-dimethyl-3-(2-(naphthalen-2-yl)-2-oxoethyl)-1-(2-oxo-2-(9-(phenylsulfonyl)-1,3,4,9-tetrahydro-2H-pyrido[3,4-b]indol-2-yl)ethyl)-1H-benzo[d]imidazol-3-ium bromide

Yield 91%. Yellow solid. Mp 234-235 °C. IR  $\nu_{max}$  ( $cm^{-1}$ ): 3410.12, 3127.23, 3053.62, 2935.80, 2789.85, 1661.25, 1564.31, 1441.81, 1371.01, 1224.05, 1180.64, 967.38, 755.51, 685.00, 604.64, 563.63, 480.64.  $^1H$  NMR (400 MHz, DMSO):  $\delta$  = 9.58 (1H, d), 8.94 (1H, s), 8.24 (1H, d,  $J$  = 8 Hz), 8.16 (1H, d,  $J$  = 8 Hz), 7.93-7.87 (6H, m), 7.76-7.55 (6H, m), 7.40-7.30 (2H, m), 6.59 (2H, s), 5.99 (2H, d), 5.18 (2H, d), 3.94 (2H, t), 2.99 (2H, s), 2.42 (6H, t).  $^{13}C$  NMR (100 MHz, DMSO):  $\delta$  = 191.55, 164.89, 143.88, 137.50, 136.87, 136.82, 136.03, 135.60, 135.24, 132.51, 131.60, 131.32, 131.01, 130.78, 130.68, 130.57, 130.45, 130.16, 129.82, 129.49, 129.16, 128.38, 127.89, 127.17, 126.79, 125.47, 124.41, 123.85, 119.48, 117.97, 114.23, 113.86, 79.82, 79.49, 79.16, 53.77, 21.76, 20.46, 20.43. HRMS (ESI-TOF)  $m/z$  Calcd for  $C_{40}H_{35}BrN_4O_4S$   $[M-Br]^+$  746.1562. found 667.2373.

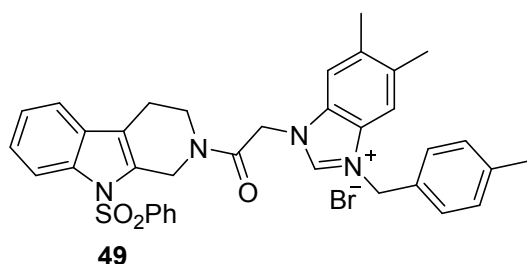

5,6-dimethyl-3-(4-methylbenzyl)-1-(2-oxo-2-(9-(phenylsulfonyl)-1,3,4,9-tetrahydro-2H-pyrido[3,4-b]indol-2-yl)ethyl)-1H-benzo[d]imidazol-3-ium bromide

Yield 79%. Yellow solid. Mp 270-271 °C. IR  $\nu_{max}$  ( $cm^{-1}$ ): 3874.20, 3833.29, 3729.85, 3394.55, 3121.05, 2975.91, 2909.85, 2387.24, 2314.68, 2106.64, 2387.24, 2314.68, 2106.64, 1660.44, 1560.72, 1375.10, 1221.15, 1178.77, 876.89, 754.56, 683.75, 605.84.  $^1H$  NMR (400 MHz, DMSO):  $\delta$  = 9.74 (1H, s), 8.07-8.05 (2H, d), 7.92-7.86

(4H, m), 7.71-7.56 (4H, m), 7.43-7.34 (4H, m), 7.28-7.26 (2H, d), 5.92-5.87 (2H, d), 5.80-5.78 (2H, d), 5.19-5.07 (2H, d), 3.96-3.90 (4H, m), 2.42-2.41 (6H, d), 2.32 (3H, s).  $^{13}\text{C}$  NMR (120 MHz, DMSO):  $\delta$  = 164.51, 142.35, 138.29, 137.00, 136.61, 136.41, 135.13, 134.83, 131.06, 130.72, 130.56, 130.06, 130.01, 129.65, 129.62, 129.04, 128.97, 128.26, 128.17, 126.72, 126.38, 125.08, 124.02, 119.05, 117.53, 113.80, 113.48, 113.28, 49.55, 48.04, 41.66, 41.40, 40.03, 39.92, 39.78, 39.64, 39.50, 39.36, 39.22, 39.08, 21.30, 20.75, 20.07, 20.02. HRMS (ESI-TOF)  $m/z$  Calcd for  $\text{C}_{36}\text{H}_{35}\text{BrN}_4\text{O}_3\text{S}$   $[\text{M}+1]^+$  603.2411. found 603.2411.

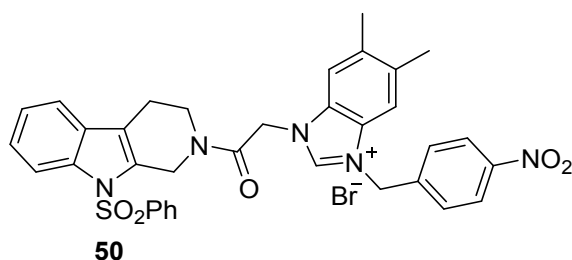

5,6-dimethyl-3-(4-nitrobenzyl)-1-(2-oxo-2-(9-(phenylsulfonyl)-1,3,4,9-tetrahydro-2H-pyrido[3,4-b]indol-2-yl)ethyl)-1H-benzo[d]imidazol-3-ium bromide

Yield 89%. Yellow solid. Mp 227-228 °C. IR  $\nu_{\text{max}}$  ( $\text{cm}^{-1}$ ): 3730.28, 3412.09, 3113.71, 2987.60, 2911.69, 2857.06, 2314.26, 2105.73, 1798.10, 1656.98, 1611.81, 1562.75, 1522.33, 1442.12, 1346.80, 1224.56, 1179.08, 962.41, 797.89, 754.36, 714.45, 605.32, 562.32.  $^1\text{H}$  NMR (400 MHz, DMSO):  $\delta$  = 9.83 (1H, s), 8.29 (2H, d,  $J$  = 8.4 Hz), 8.01 (4H, t), 7.89-7.78 (1H, m), 7.72-7.53 (6H, m), 7.39-7.29 (2H, m), 6.03 (2H, s), 5.91 (2H, d), 5.11 (2H, d), 3.92 (2H, t), 2.97 (2H, s), 2.44 (6H, d).  $^{13}\text{C}$  NMR (100 MHz, DMSO):  $\delta$  = 164.88, 148.05, 143.41, 142.02, 137.46, 137.18, 137.08, 135.57, 135.23, 131.14, 130.96, 130.43, 129.63, 129.56, 129.45, 129.35, 127.15, 126.79, 125.47, 124.56, 124.42, 119.48, 117.94, 114.21, 114.10, 113.55, 49.33, 48.61, 21.75, 20.46. HRMS (ESI-TOF)  $m/z$  Calcd for  $\text{C}_{35}\text{H}_{32}\text{BrN}_5\text{O}_5\text{S}$   $[\text{M}+1]^+$  606.2157. found 606.2157.

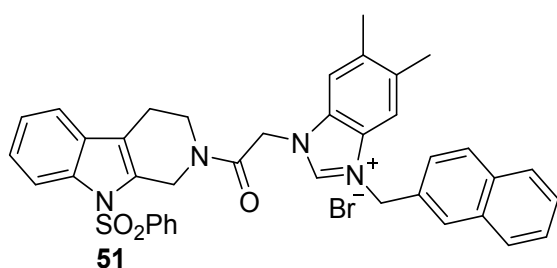

5,6-dimethyl-3-(naphthalen-2-ylmethyl)-1-(2-oxo-2-(9-(phenylsulfonyl)-1,3,4,9-tetrahydro-2H-pyrido[3,4-b]indol-2-yl)ethyl)-1H-benzo[d]imidazol-3-ium bromide

Yield 82%. Yellow solid. Mp 252-254 °C. IR  $\nu_{\max}$  (cm<sup>-1</sup>): 3421.91, 3122.92, 2973.32, 2927.60, 1659.90, 1562.65, 1441.69, 1369.75, 1224.68, 1179.96, 963.00, 754.51. <sup>1</sup>H NMR (400 MHz, DMSO):  $\delta$  = 9.73 (1H, s), 8.06-7.84 (9H, m), 7.66-7.53 (7H, m), 7.39-7.29 (2H, m), 5.99 (2H, s), 5.87 (2H, d), 5.10 (2H, d), 3.90 (2H, d), 2.95 (2H, s), 2.37 (6H, s). <sup>13</sup>C NMR (100 MHz, DMSO):  $\delta$  = 164.95, 143.05, 137.42, 137.05, 136.89, 135.54, 135.24, 133.17, 131.98, 131.18, 130.98, 130.42, 129.54, 129.45, 129.36, 128.32, 128.19, 127.89, 127.74, 127.28, 127.14, 126.79, 125.98, 125.48, 124.42, 119.46, 117.94, 114.22, 113.97, 113.71, 79.80, 79.68, 79.47, 79.14, 60.23, 50.34, 21.72, 20.49, 20.46, 14.55. HRMS (ESI-TOF)  $m/z$  Calcd for C<sub>39</sub>H<sub>35</sub>BrN<sub>4</sub>O<sub>3</sub>S [M+1]<sup>+</sup> 639.2424. found 639.2427.

### **3. Biological Assay Procedures and Results**

#### **3.1 Cytotoxicity assay**

The assay was in five kinds of cell lines (HL-60, SMMC-7721, A549, MCF-7 and SW480). Cells were cultured at 37 °C under a humidified atmosphere of 5% CO<sub>2</sub> in RPMI 1640 medium supplemented with 10% fetal serum and dispersed in replicate 96-well plates. Compounds were then added. After 48 h exposure to the compounds, cells viability were determined by the [3-(4,5-dimethylthiazol-2-yl)-2,5-diphenyl-tetrazoliumbromide] (MTT) cytotoxicity assay by measuring the absorbance at 570 nm with a microplate spectrophotometer. Each test was performed in triplicate.

#### **3.2 Cytotoxic activities of hybrid compounds 17–54 invitro<sup>b</sup> (IC<sub>50</sub>, μM<sup>a</sup>)**

**Table 2** Cytotoxic activities of hybrid compounds **17-54** in vitro<sup>b</sup> (IC<sub>50</sub>, μM<sup>a</sup>)

| Entry | Compound No. | HL-60  | SMMC-7721 | A-549  | MCF-7  | SW480  |
|-------|--------------|--------|-----------|--------|--------|--------|
| 1     | <b>17</b>    | >40    | >40       | >40    | >40    | >40    |
| 2     | <b>18</b>    | >40    | >40       | >40    | >40    | >40    |
| 3     | <b>19</b>    | 17.81  | >40       | 28.16  | 21.00  | 29.80  |
| 4     | <b>20</b>    | 36.73  | >40       | >40    | >40    | >40    |
| 5     | <b>21</b>    | >40    | >40       | >40    | >40    | >40    |
| 6     | <b>22</b>    | >40    | >40       | >40    | >40    | >40    |
| 7     | <b>23</b>    | >40    | >40       | >40    | >40    | >40    |
| 8     | <b>24</b>    | >40    | >40       | >40    | >40    | >40    |
| 9     | <b>25</b>    | >40    | >40       | >40    | >40    | >40    |
| 10    | <b>26</b>    | 21.81  | 27.59     | >40    | 20.47  | 32.35  |
| 11    | <b>27</b>    | 11.09  | 19.80     | >40    | 17.56  | 16.69  |
| 12    | <b>28</b>    | 10.68  | 30.39     | >40    | 19.51  | >40    |
| 13    | <b>29</b>    | >40    | >40       | >40    | >40    | >40    |
| 14    | <b>30</b>    | 3.54   | 13.23     | 18.02  | 12.24  | 17.46  |
| 15    | <b>31</b>    | >40    | >40       | >40    | >40    | >40    |
| 16    | <b>32</b>    | 3.32   | 12.11     | 14.21  | 3.74   | 11.80  |
| 17    | <b>33</b>    | >40    | >40       | >40    | >40    | >40    |
| 18    | <b>34</b>    | 11.87  | 16.77     | >40    | 8.28   | 35.62  |
| 19    | <b>35</b>    | 2.47   | 10.67     | 13.39  | 10.44  | 10.14  |
| 20    | <b>36</b>    | 2.56   | 12.48     | 22.13  | 3.37   | 11.84  |
| 21    | <b>37</b>    | 2.77   | 12.81     | 14.46  | 2.61   | 12.81  |
| 22    | <b>38</b>    | 14.39  | 24.60     | 21.41  | 16.44  | 13.60  |
| 23    | <b>39</b>    | 10.61  | 17.28     | 31.23  | 16.59  | 11.81  |
| 24    | <b>40</b>    | 3.97   | 14.95     | 18.27  | 11.34  | 13.58  |
| 25    | <b>41</b>    | 3.24   | 15.03     | 8.78   | 8.05   | 11.01  |
| 26    | <b>42</b>    | 3.04   | 14.78     | 17.01  | 7.68   | 11.70  |
| 27    | <b>43</b>    | 13.58  | 23.35     | 35.36  | 17.42  | 12.44  |
| 28    | <b>44</b>    | 4.34   | 14.74     | 17.28  | 10.33  | 11.76  |
| 29    | <b>45</b>    | 10.18  | 14.50     | 22.75  | 11.26  | 13.19  |
| 30    | <b>46</b>    | 3.75   | 15.30     | >40    | 4.97   | 10.47  |
| 31    | <b>47</b>    | 3.39   | 13.18     | 23.70  | 8.23   | 16.37  |
| 32    | <b>48</b>    | 3.08   | 14.77     | >40    | 3.90   | 16.17  |
| 33    | <b>49</b>    | 4.30   | 15.13     | 29.52  | 10.17  | 14.20  |
| 34    | <b>50</b>    | 12.81  | 33.19     | >40    | 10.81  | >40    |
| 35    | <b>51</b>    | 2.61   | 14.15     | 17.13  | 2.79   | 9.46   |
| 36    | DDP (MW 300) | 2.27   | 9.98      | 8.25   | 14.69  | 15.11  |
| 37    | Taxol        | <0.008 | <0.008    | <0.008 | <0.008 | <0.008 |

<sup>a</sup> Cytotoxicity as IC<sub>50</sub> for each cell line, is the concentration of compound which reduced by 50% the optical density of treated cells with respect to untreated cells using the MTT assay.

<sup>b</sup> Data represent the mean values of three independent determinations.

### 3.3 Cytotoxicity of the representative compound 51 against human normal lung epithelial cell line (BEAS-2B)

By comparing the IC<sub>50</sub> values of the tested compounds towards cancer cell lines with those towards the normal lung epithelial cells BEAS-2B.

**Table 3** Cytotoxicity of compound 15 against A549 and BEAS-2B cells in vitro (IC<sub>50</sub>, μM)

| Entry | Compound no. | BEAS-2B | A549  |
|-------|--------------|---------|-------|
| 1     | 51           | >40     | 17.13 |
| 2     | DDP          | 9.12    | 8.25  |

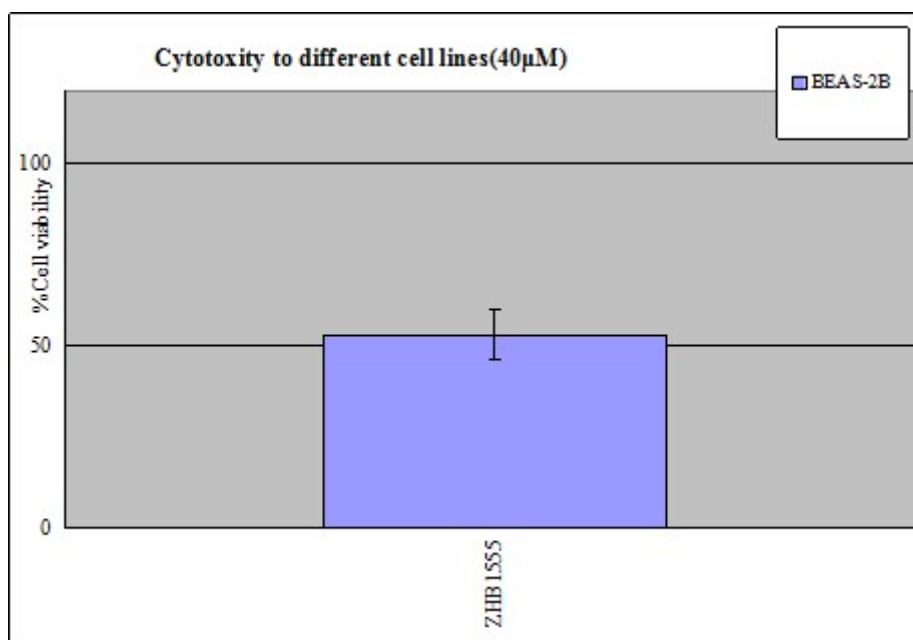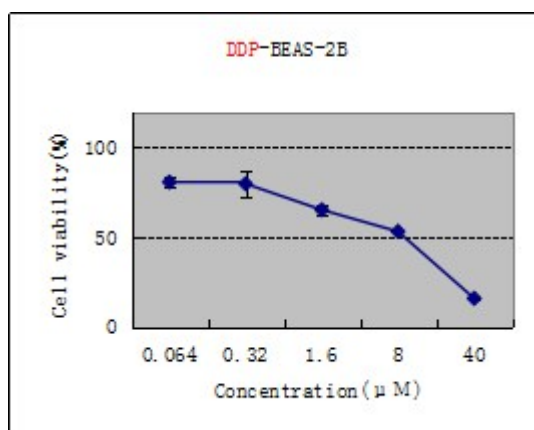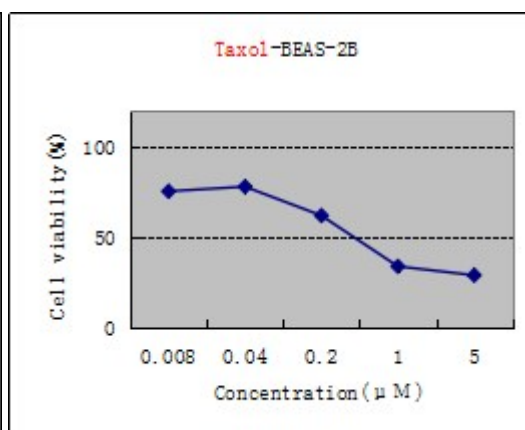

## 4. Cell apoptosis and cell cycle analysis

### 4.1 Cell apoptosis analysis

Cell apoptosis was analyzed using the Annexin V-FITC/PI Apoptosis kit (BD Biosciences, Franklin Lakes, NJ) according to the manufacturer's protocols. Cells were seeded in 6-well plates at a density of  $1.2 \times 10^6$  cells/well. After 48 h of compound treatment at the indicated concentrations, cells were collected and then washed twice with cold PBS, and then resuspended in a binding buffer containing Annexin V-FITC and propidium iodine (PI). After incubation for 15 min at room temperature in the dark, the fluorescent intensity was measured using a FACSCalibur flow cytometer (BD Biosciences, Franklin Lakes, NJ).

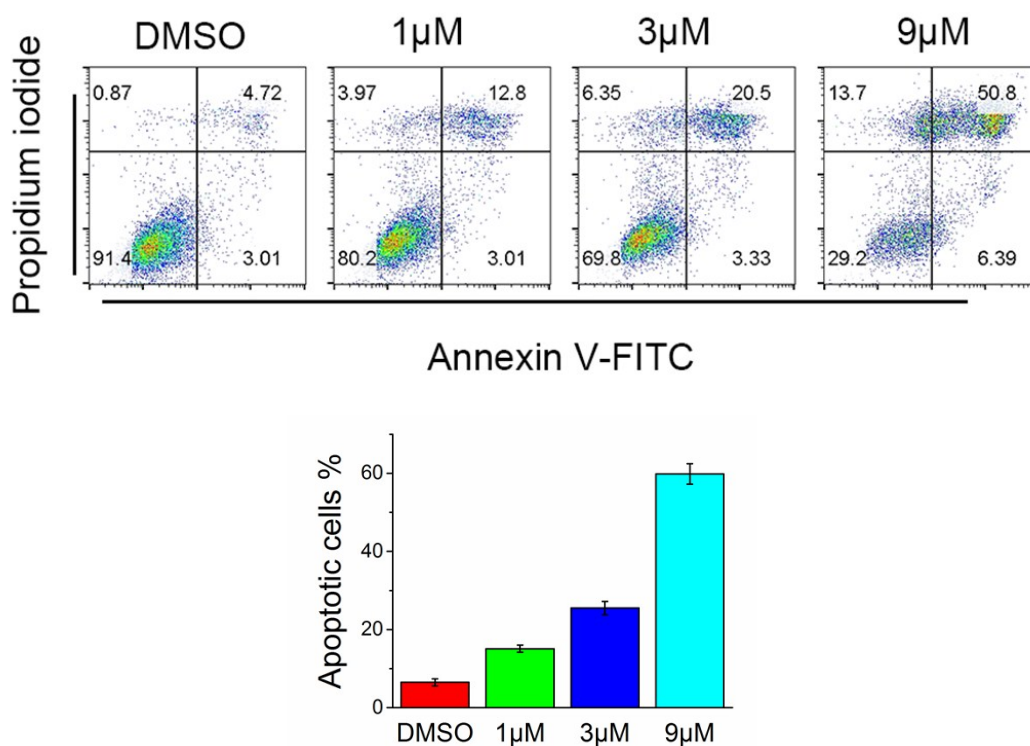

**Fig. 1** Compound **51** caused significant apoptosis of SMMC-7721 cells. (A) Cells were treated with 4, 8 and 16  $\mu\text{M}$  compound **51** for 48 h. Cell apoptosis was determined by Annexin V-FITC/PI double-staining assay. (B) The quantification of cell apoptosis. Data represents the mean  $\pm$  S.D. of three independent experiments.



## 4.2 Cell cycle analysis

To analyze the DNA content by flow cytometry, cells were collected and washed twice with PBS. Cells were fixed with 70% ethanol overnight. Fixed cells were washed with PBS, and then stained with a 50  $\mu\text{g/ml}$  propidium iodide (PI) solution containing 50  $\mu\text{g/ml}$  RNase A for 30 min at room temperature. Fluorescence intensity was analyzed by FACSCalibur flow cytometer (BD Biosciences, San Jose, CA, USA). The percentages of the cells distributed in different phases of the cell cycle were determined using ModFIT LT 2.0.

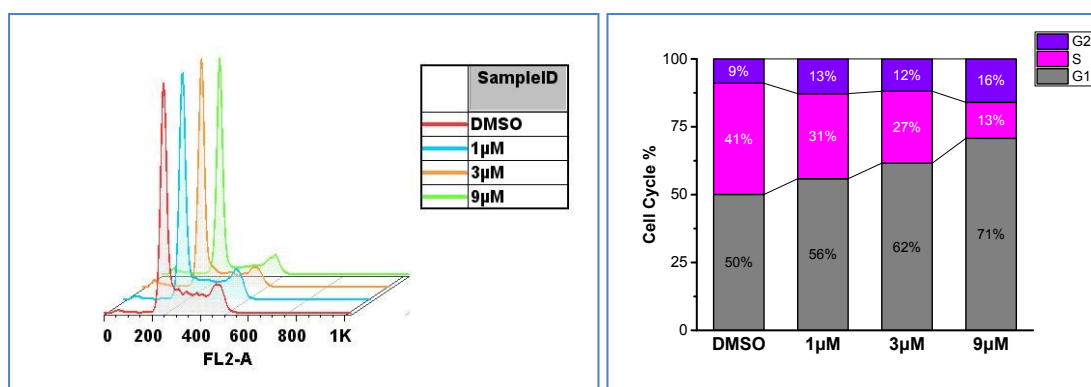

| Treatment                             | Cells (%)      |                |                |
|---------------------------------------|----------------|----------------|----------------|
|                                       | G0/G1          | S              | G2/M           |
| DMSO                                  | 49.1 $\pm$ 2.7 | 40.2 $\pm$ 2.9 | 8.8 $\pm$ 0.2  |
| Compound <b>25</b> (1 $\mu\text{M}$ ) | 52.9 $\pm$ 1.3 | 29.7 $\pm$ 0.7 | 12.1 $\pm$ 1.8 |
| Compound <b>25</b> (3 $\mu\text{M}$ ) | 57.4 $\pm$ 1.7 | 24.7 $\pm$ 1.1 | 11.1 $\pm$ 0.4 |
| Compound <b>25</b> (9 $\mu\text{M}$ ) | 66.7 $\pm$ 2.3 | 12.5 $\pm$ 1.2 | 15.1 $\pm$ 1.3 |

**Fig. 2** Compound **51** induces S phase arrest in SMMC-7721 cells. (A) Cells were treated with 1, 2 and 4  $\mu\text{M}$  of compound **51** for 24 h. Cell cycle was determined by PI staining and cell cytometry. (B) The percentages of cells in different phases were quantified. At least three independent experiments were performed and data of one representative experiment is shown.

## 5. <sup>1</sup>H-NMR and <sup>13</sup>C-NMR Spectral of New Compounds

Compound 4 <sup>1</sup>H-NMR 400M CDCl<sub>3</sub>

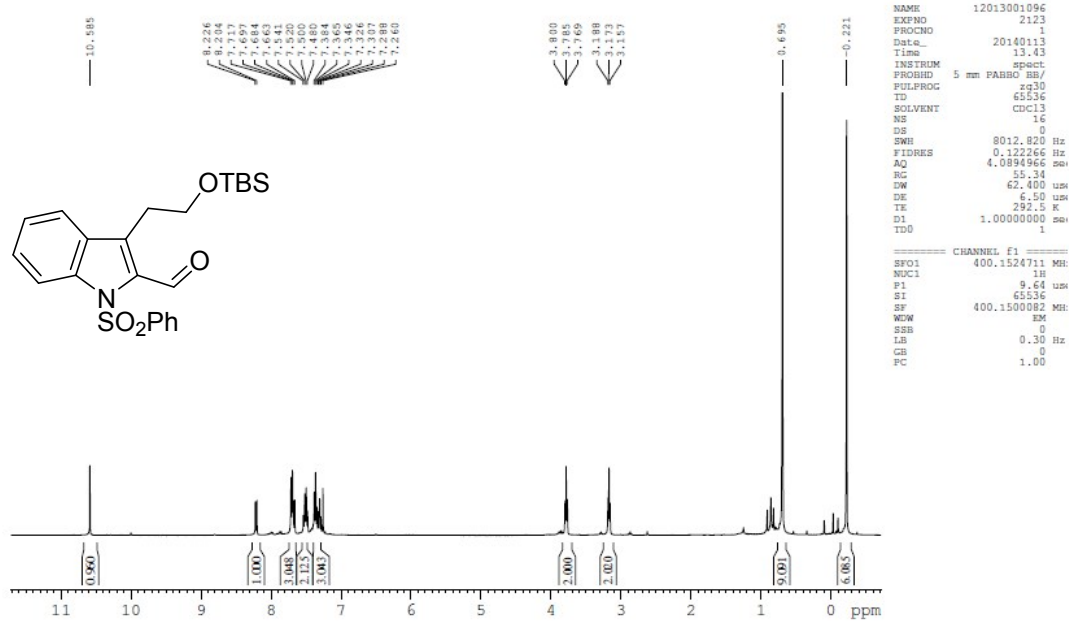

Compound 4 <sup>13</sup>C-NMR 100M CDCl<sub>3</sub>

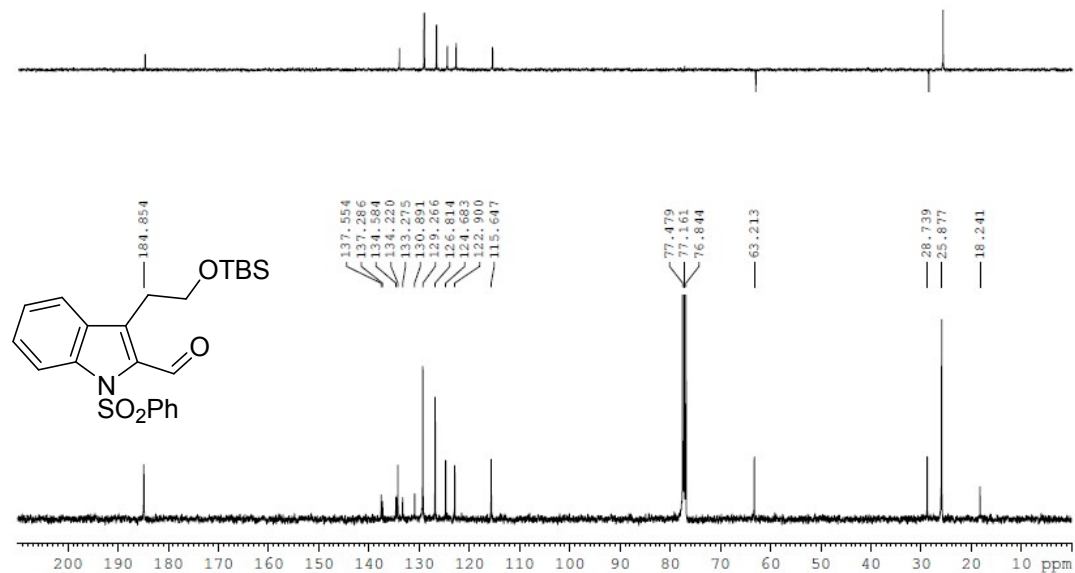

Compound 6 <sup>1</sup>H-NMR 400M CDCl<sub>3</sub>

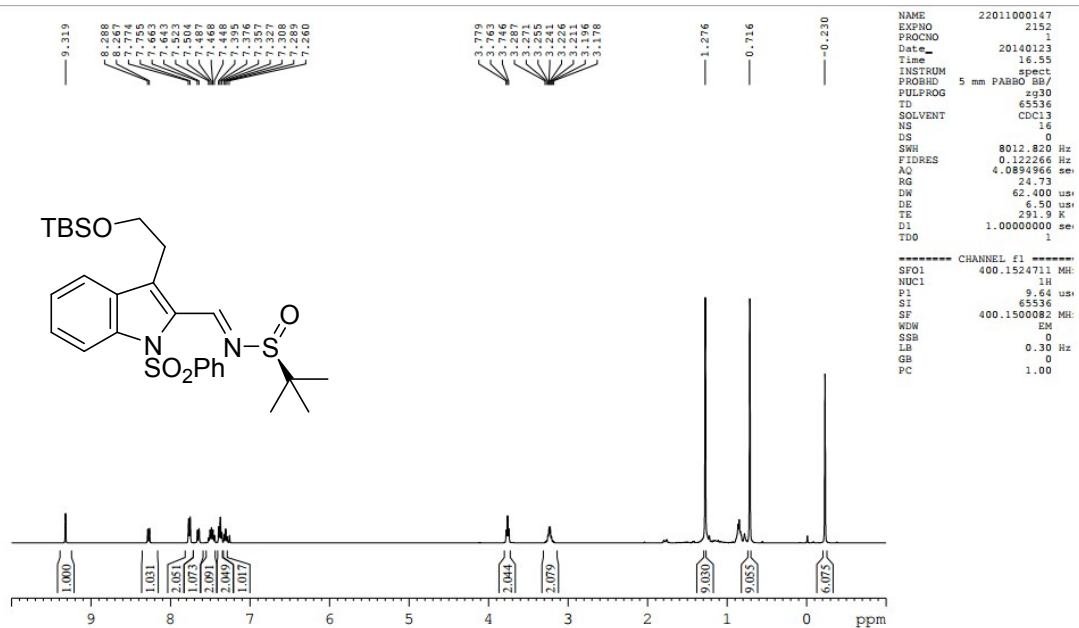

Compound 6 <sup>13</sup>C-NMR 100M CDCl<sub>3</sub>

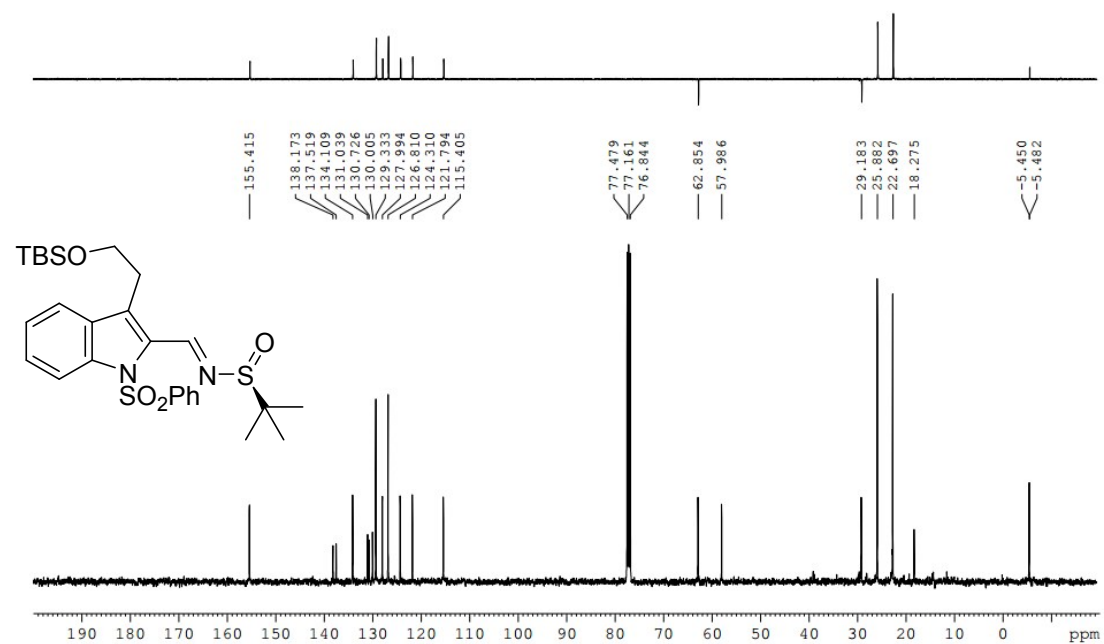

Compound 7 <sup>1</sup>H-NMR 400M CDCl<sub>3</sub>

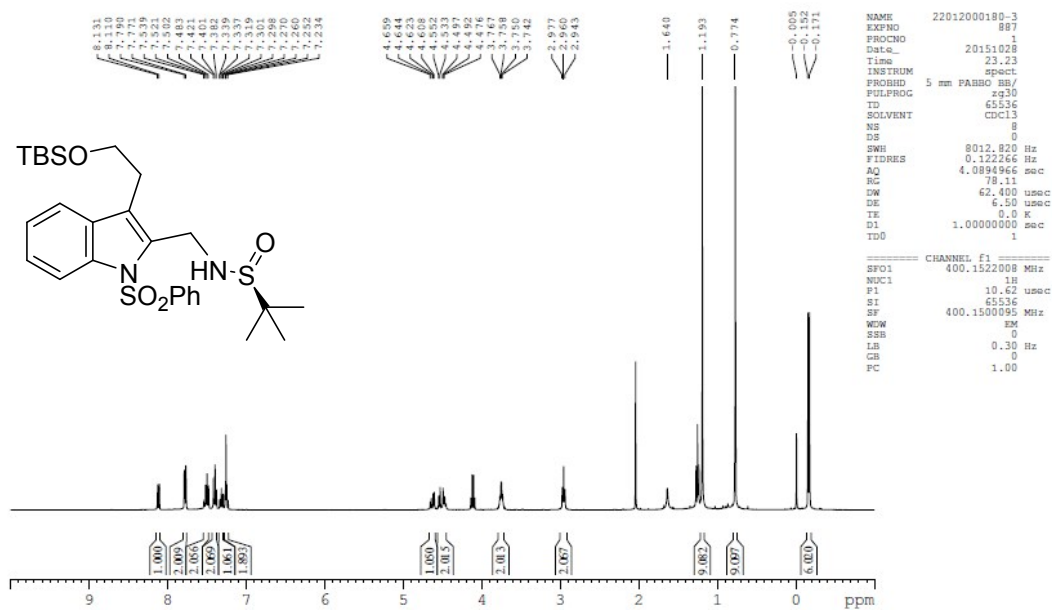

Compound **10**  $^1\text{H-NMR}$  400M  $\text{CDCl}_3$

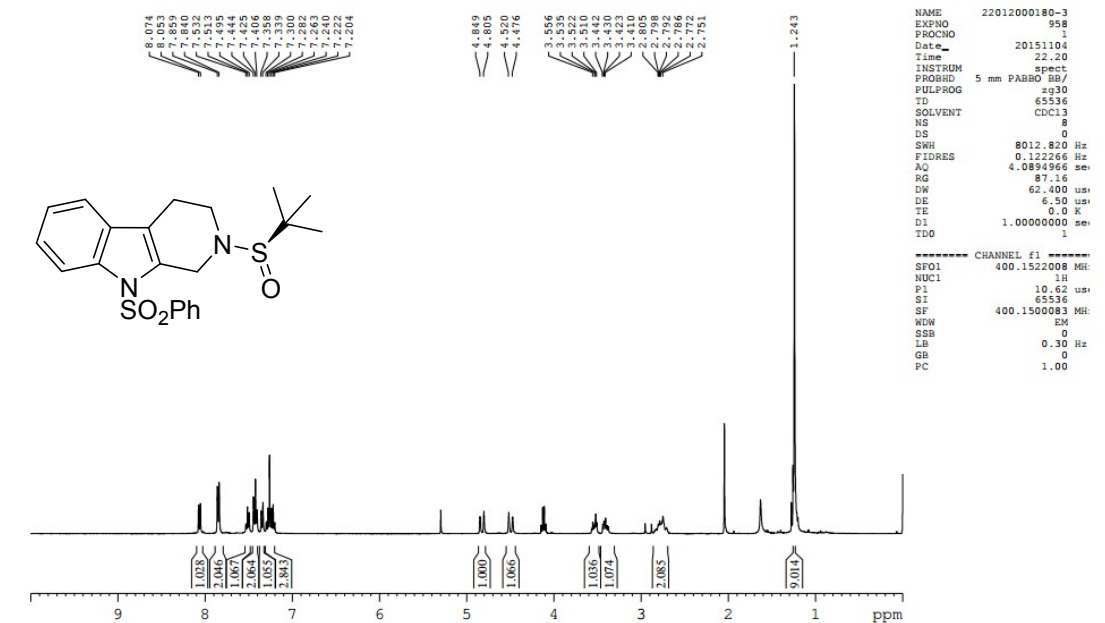

Compound **8**  $^{13}\text{C-NMR}$  100M  $\text{CDCl}_3$

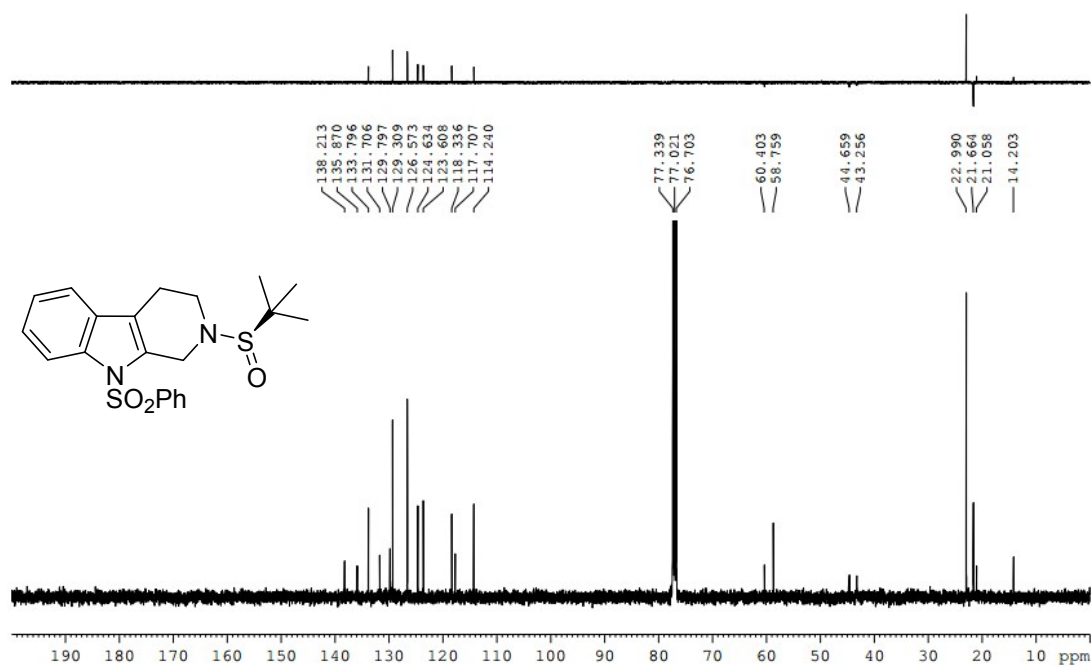

Compound **11b** <sup>1</sup>H-NMR 400M CDCl<sub>3</sub>

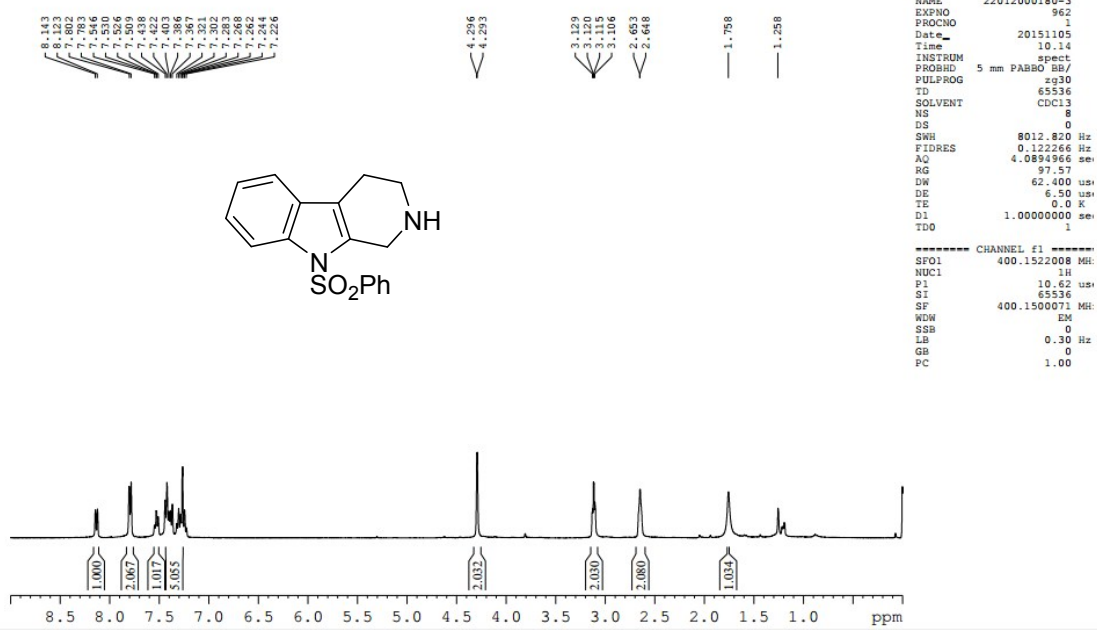

Compound **11b** <sup>13</sup>C-NMR 100M CDCl<sub>3</sub>

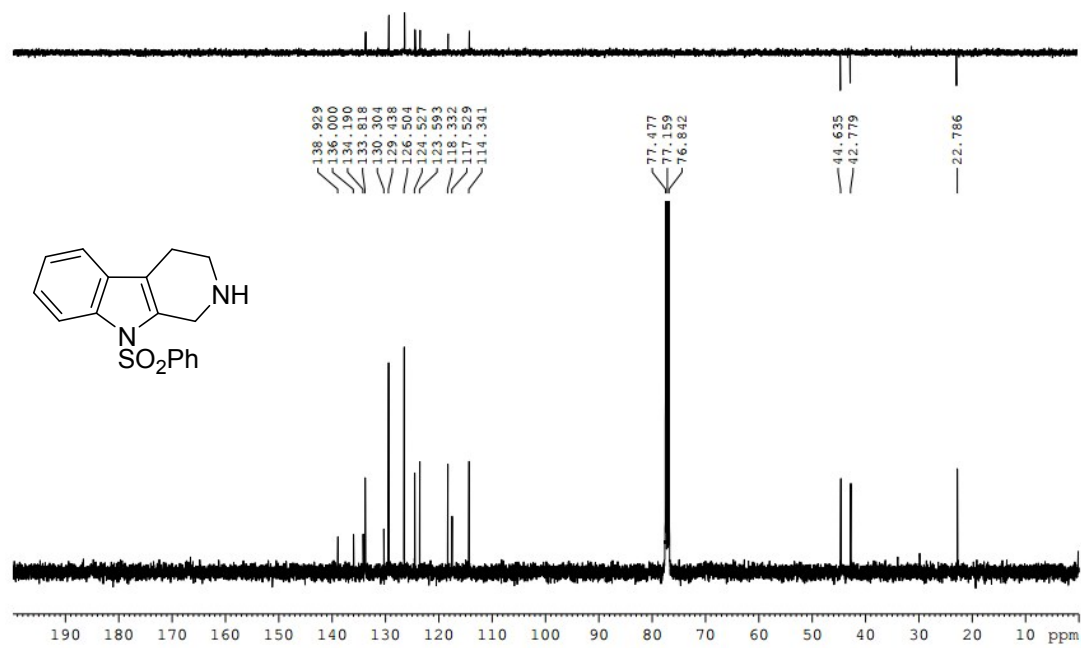

# Compound 17 <sup>1</sup>H-NMR 400M DMSO

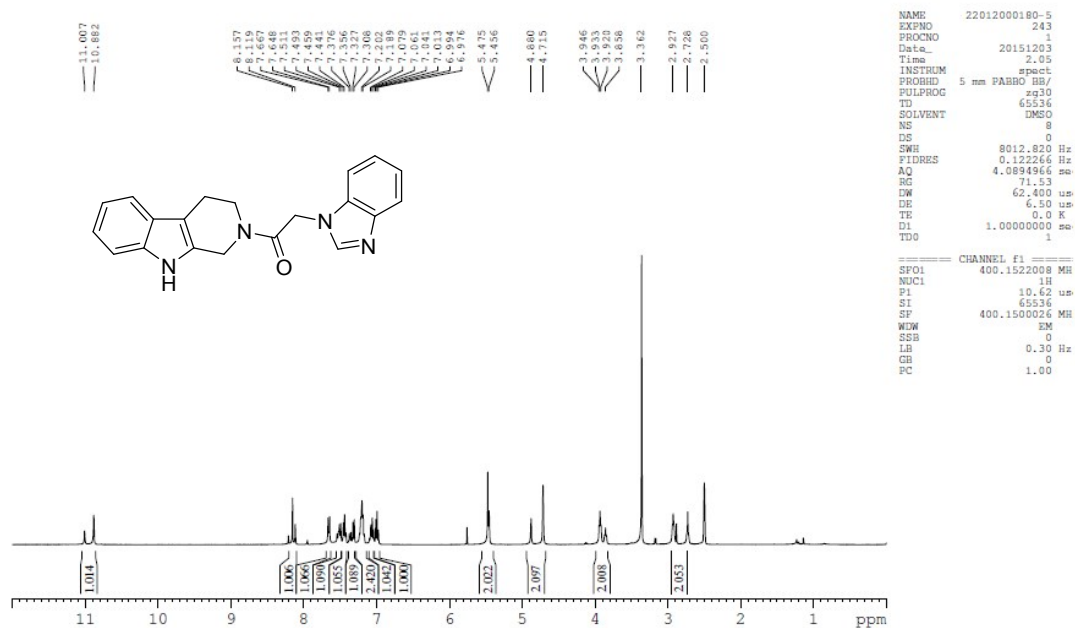

# Compound 17 <sup>13</sup>C-NMR 100M DMSO

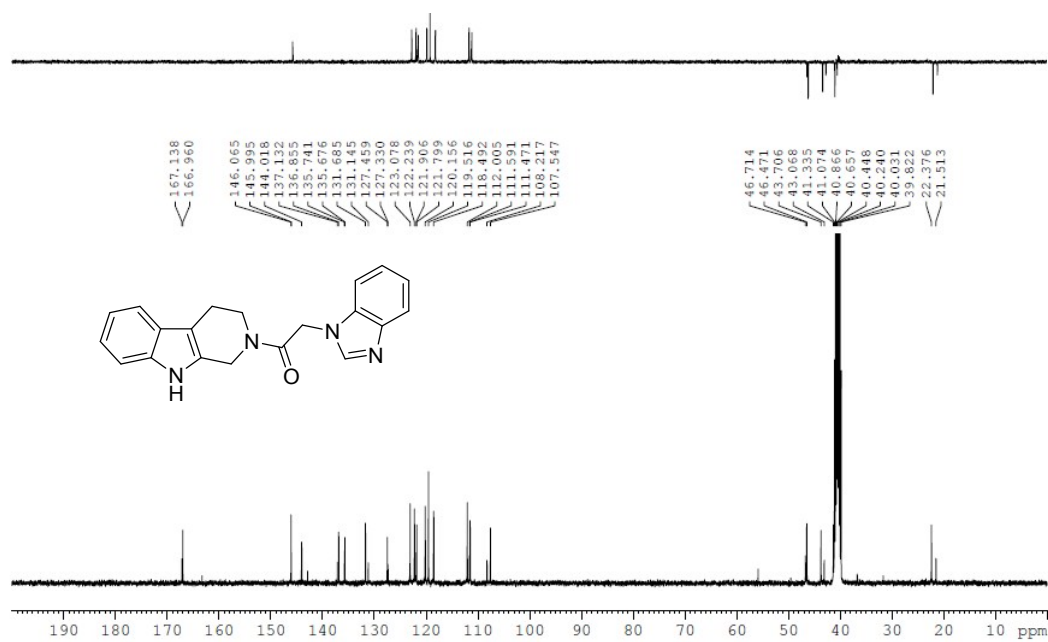

### Compound 18 <sup>1</sup>H-NMR 400M DMSO

8.155  
8.144  
8.114  
8.093  
7.879  
7.879  
7.751  
7.732  
7.576  
7.565  
7.519  
7.474  
7.453  
7.432  
7.394  
7.357  
7.339  
7.339  
7.261  
7.106  
6.968

5.296  
5.293  
5.109  
4.988  
4.873  
3.934  
3.910  
3.754  
3.741  
3.728

2.740

1.838

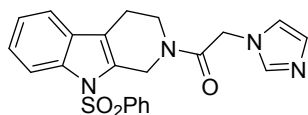

```

NAME      22012000180-3
EXPNO    1029
PROCNO   1
PROCRES  20151103
Time     9.43
INSTRUM  spect
PROBHD   5 mm PABBO BBI
PULPROG  zg30
TD        65536
SOLVENT  DMSO-d6
NS        8
DS        0
SWH       8012.820 Hz
FIDRES    0.122266 Hz
AQ         4.0894966 sec
RG         87.16
DM         62.400 us
DE         6.50 us
TE         0.0 K
D1         1.0000000 sec
TDO        1
----- CHANNEL f1 -----
SFO1     400.1522008 MHz
NUC1      1H
P1        10.62 us
PR         55536
SFO2     400.1500000 MHz
NUC2      1H
WDW       EM
SSB        0
GB         0.00 Hz
PC         1.00
    
```

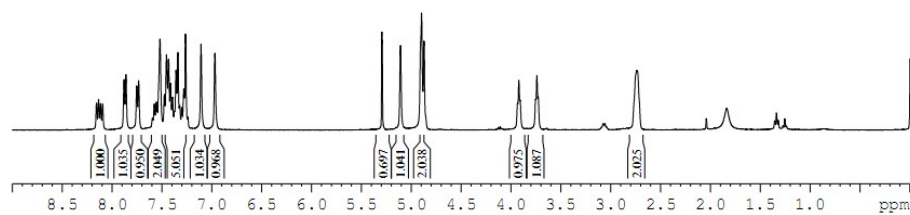

### Compound 18 <sup>13</sup>C-NMR 100M DMSO

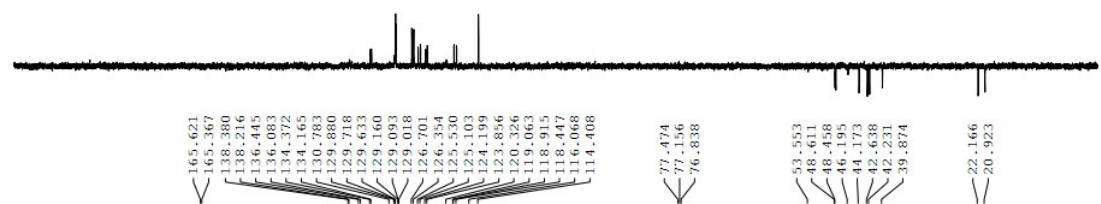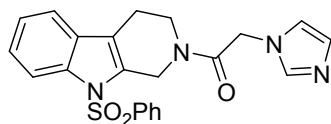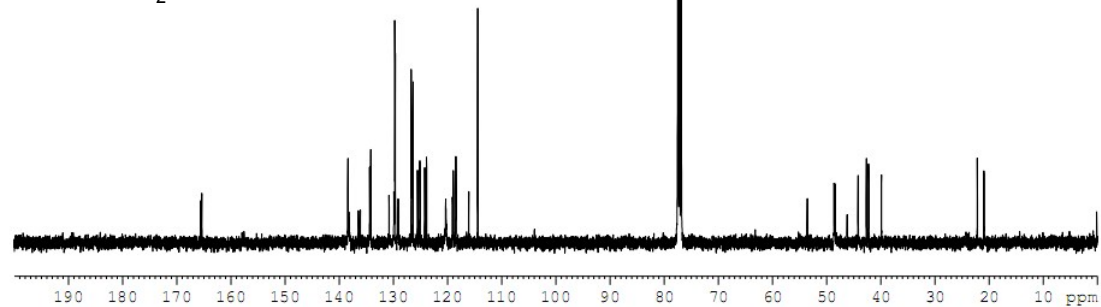



Compound 19 <sup>1</sup>H-NMR 400M DMSO

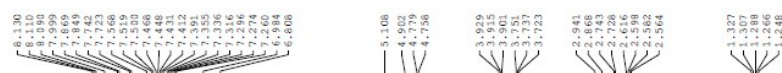

```

NAME      22012000180-5
EXPNO    205
PROCNO   1
Date_    20151126
Time     7.18
INSTRUM  spect
PROBHD   5 mm PABBO BB/
PULPROG  zg30
TD        65536
SOLVENT  CDCl3
NS        8
DS        0
SWH       8012.820 Hz
FIDRES    0.122266 Hz
AQ        4.0894966 sec
RG        63.8
DW        62.400 usec
DE        6.50 usec
TE        0.0 K
D1        1.00000000 sec
TDO       1
===== CHANNEL f1 =====
SFO1     400.1522008 MHz
NUC1     1H
P1       10.62 usec
SI       65536
SF       400.1500000 MHz
WDW      EM
SSB      0
LB       0.30 Hz
GB
PC       1.00
    
```

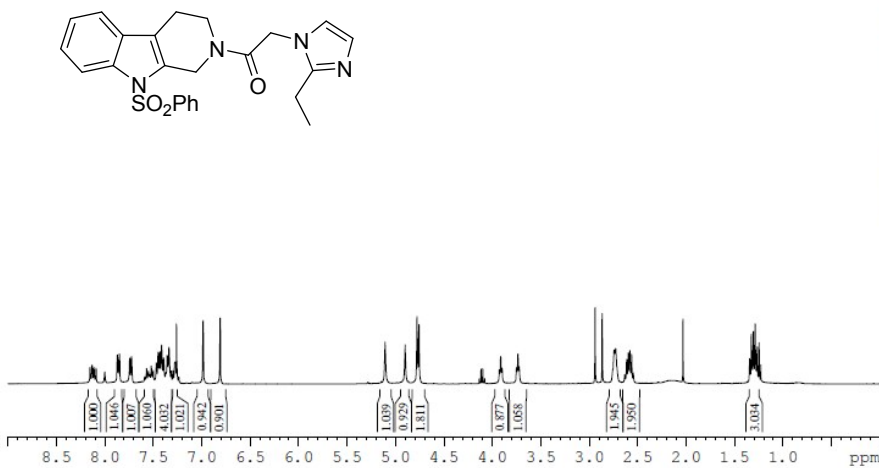

Compound 19 <sup>13</sup>C-NMR 100M DMSO

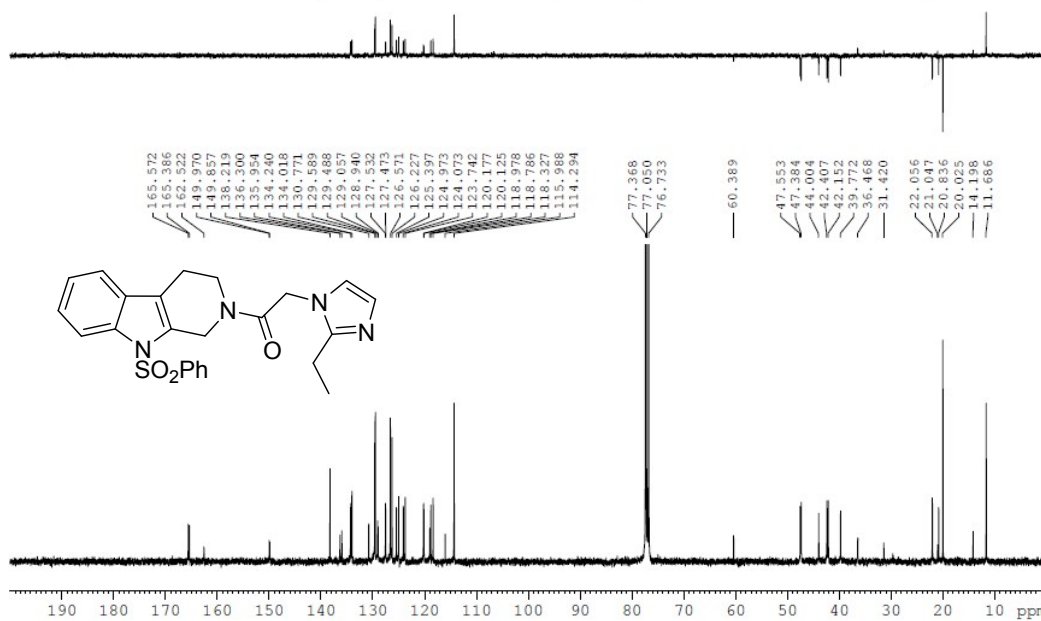

### Compound 20 <sup>1</sup>H-NMR 400M DMSO

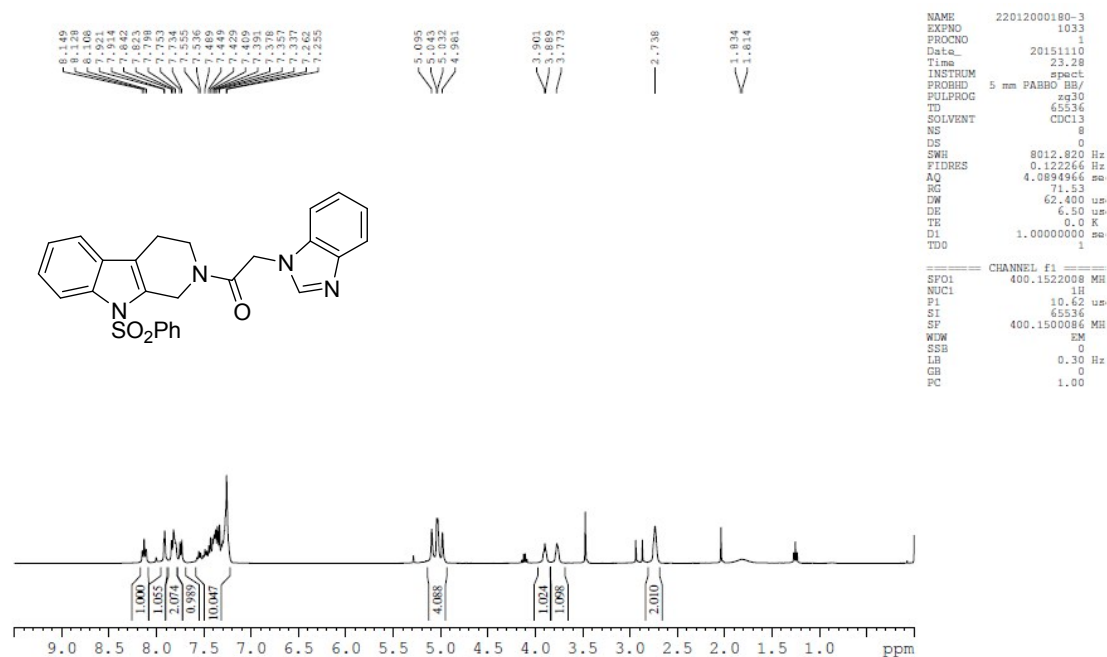

### Compound 20 <sup>13</sup>C-NMR 100M DMSO

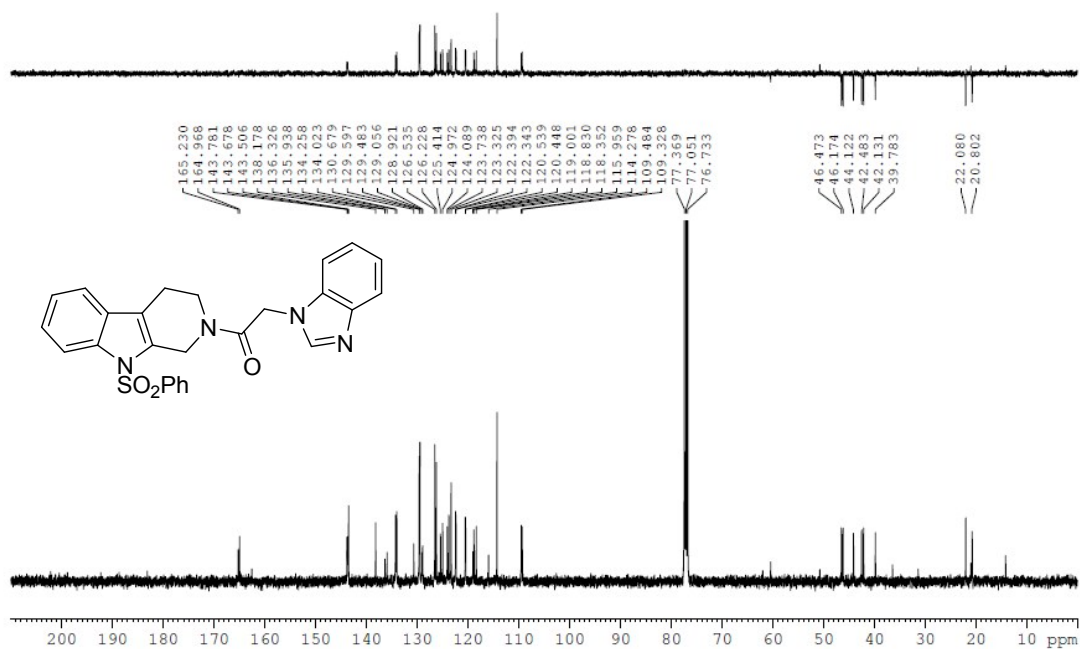

Compound 21 <sup>1</sup>H-NMR 400M DMSO

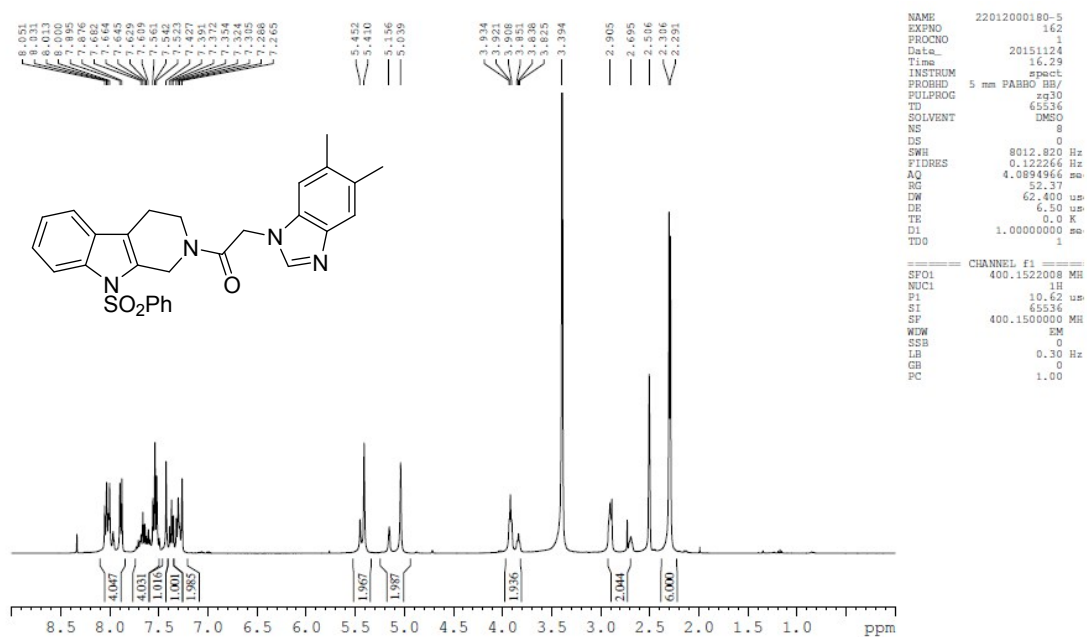

Compound 21 <sup>13</sup>C-NMR 100M DMSO

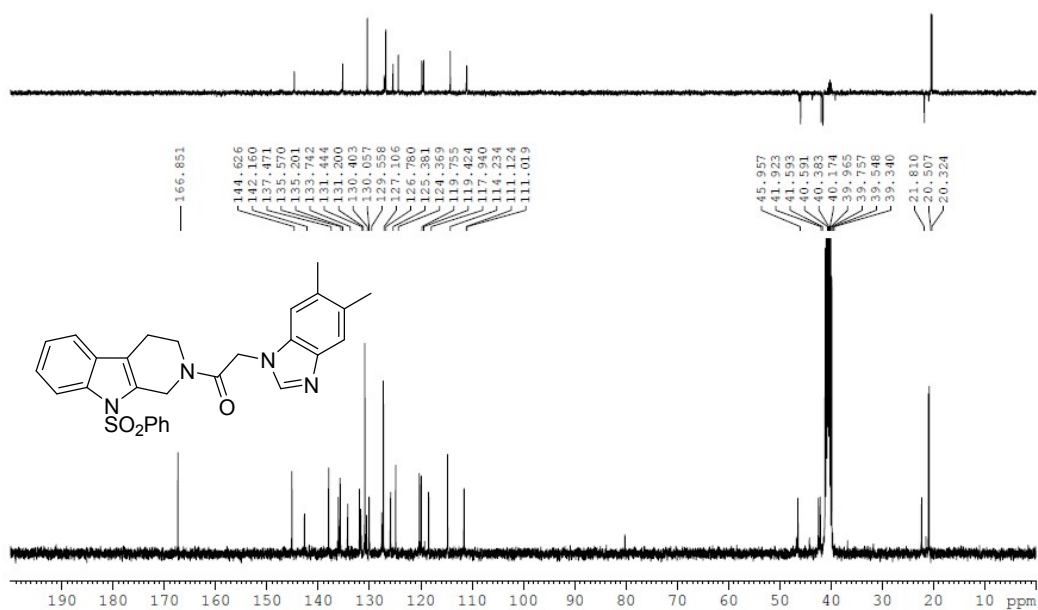

Compound 22 <sup>1</sup>H-NMR 400M DMSO

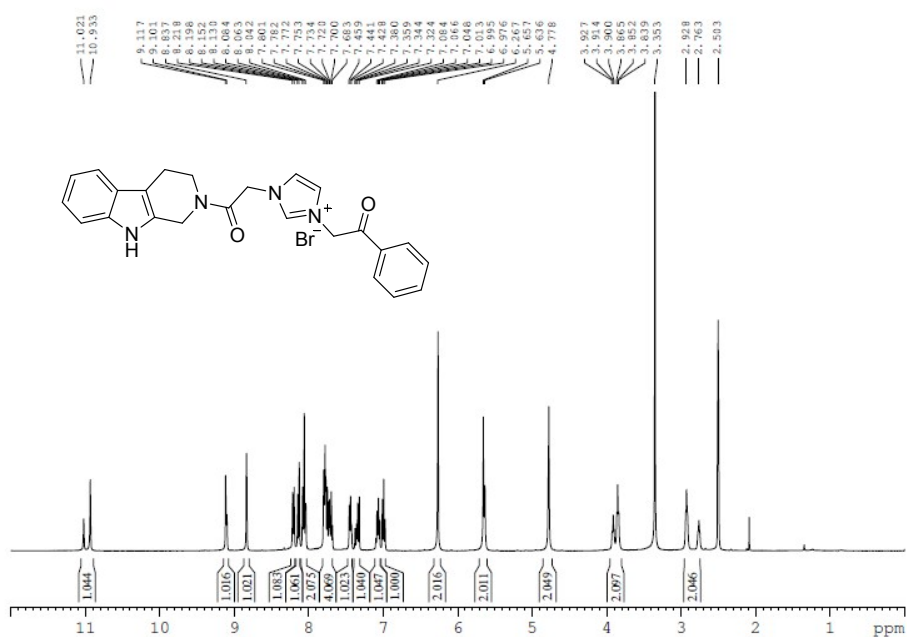

```

NAME      22012000180-5
EXPNO     271
PROCNO    1
Date_     20151207
Time      2.31
INSTRUM   spect
PROBHD    5 mm PABBO BB/
PULPROG   zg30
TD         65536
SOLVENT   DMSO
NS         20
DS         0
SWH        8012.820 Hz
FIDRES     0.122266 Hz
AQ         4.0894966 ms
RG         78.11
DE         62.400 um
TE         0.0 K
D1         1.00000000 ms
TD0        1

===== CHANNEL f1 =====
SFO1      400.1522008 MHz
NUC1      1H
P1        10.62 um
SI        6536
SF        400.1500012 MHz
WDW       EM
SSB       0
LB        0.30 Hz
GB        0
PC        1.00
    
```

Compound 22 <sup>13</sup>C-NMR 100M DMSO

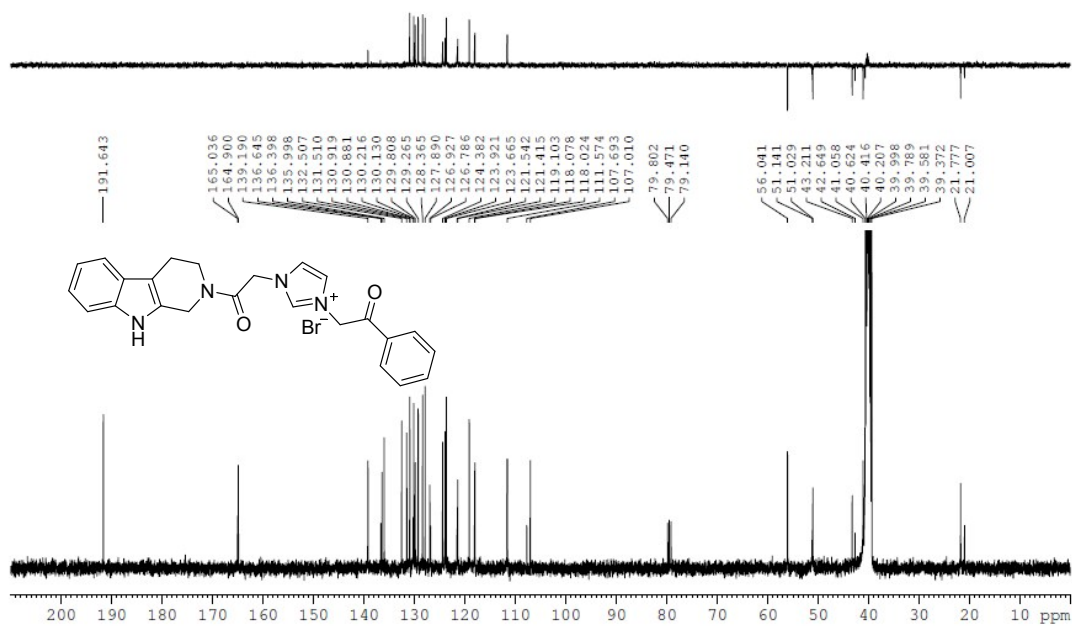

Compound 23 <sup>1</sup>H-NMR 400M DMSO

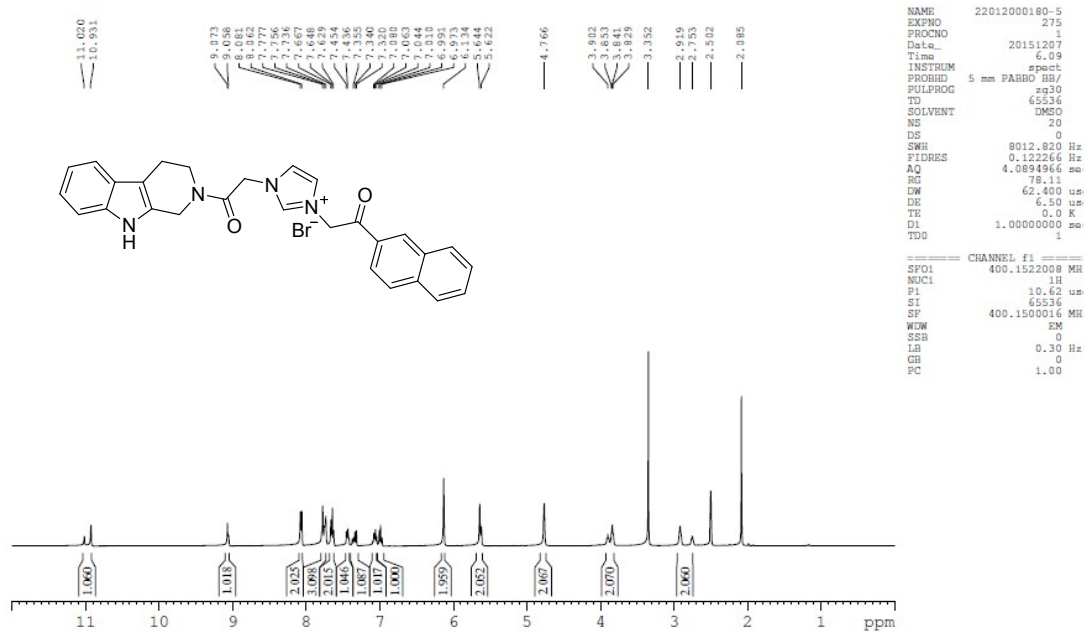

Compound 23 <sup>13</sup>C-NMR 100M DMSO

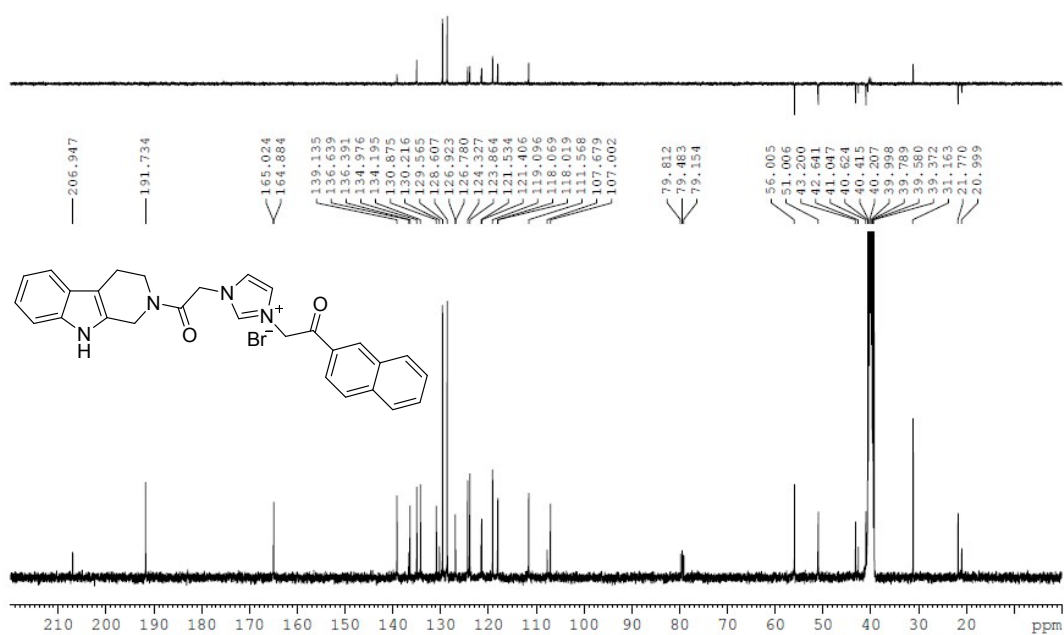

Compound 24 <sup>1</sup>H-NMR 400M DMSO

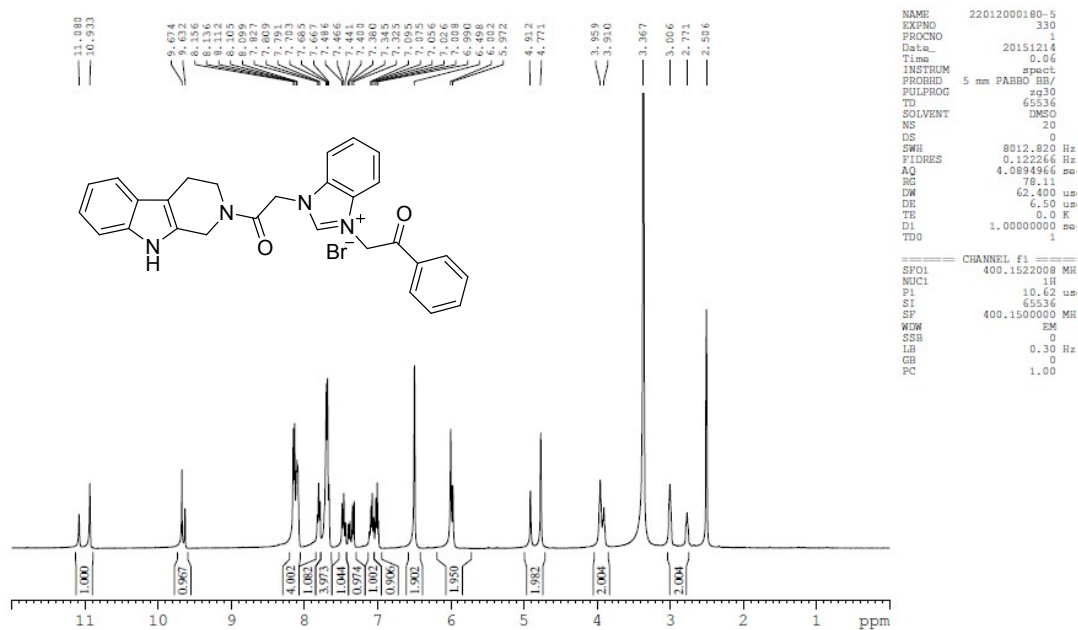

Compound 24 <sup>13</sup>C-NMR 100M DMSO

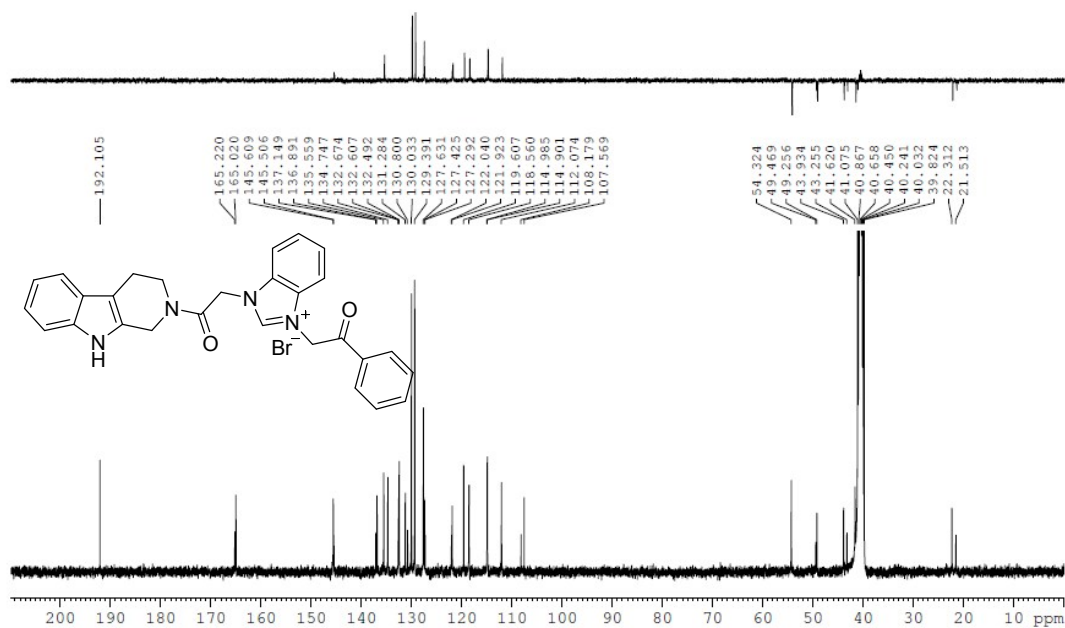

Compound 25 <sup>1</sup>H-NMR 400M DMSO

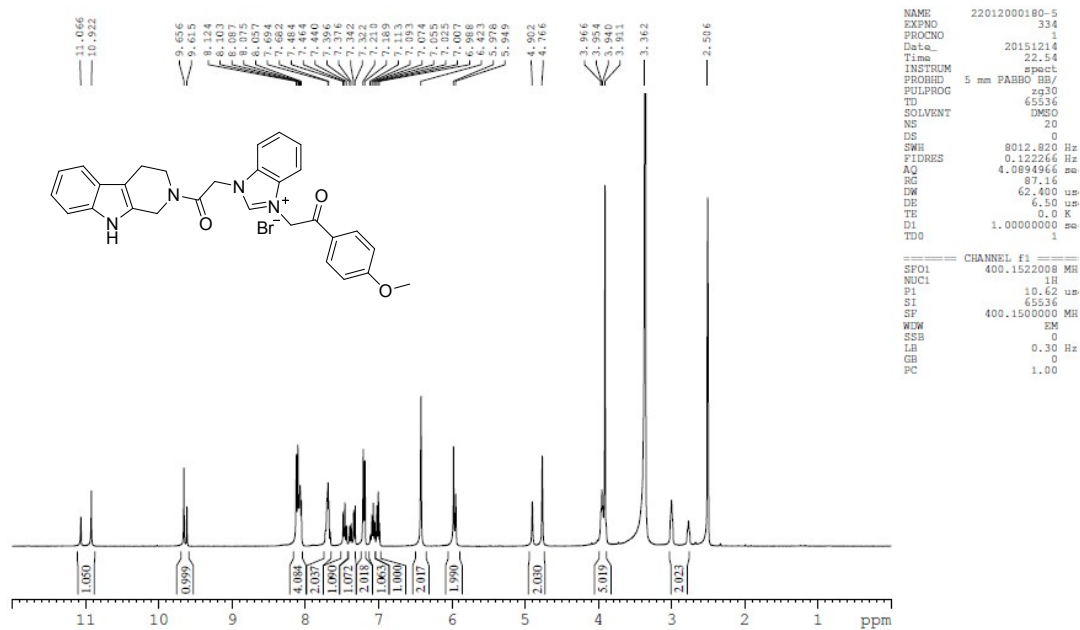

Compound 25 <sup>13</sup>C-NMR 100M DMSO

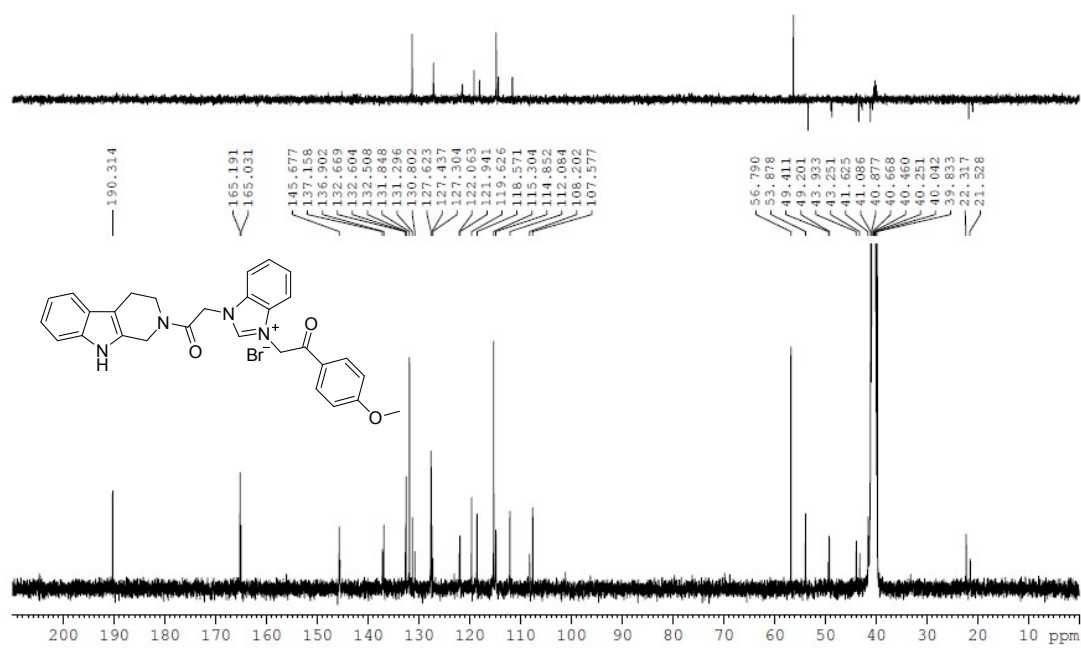

Compound 26 <sup>1</sup>H-NMR 400M DMSO

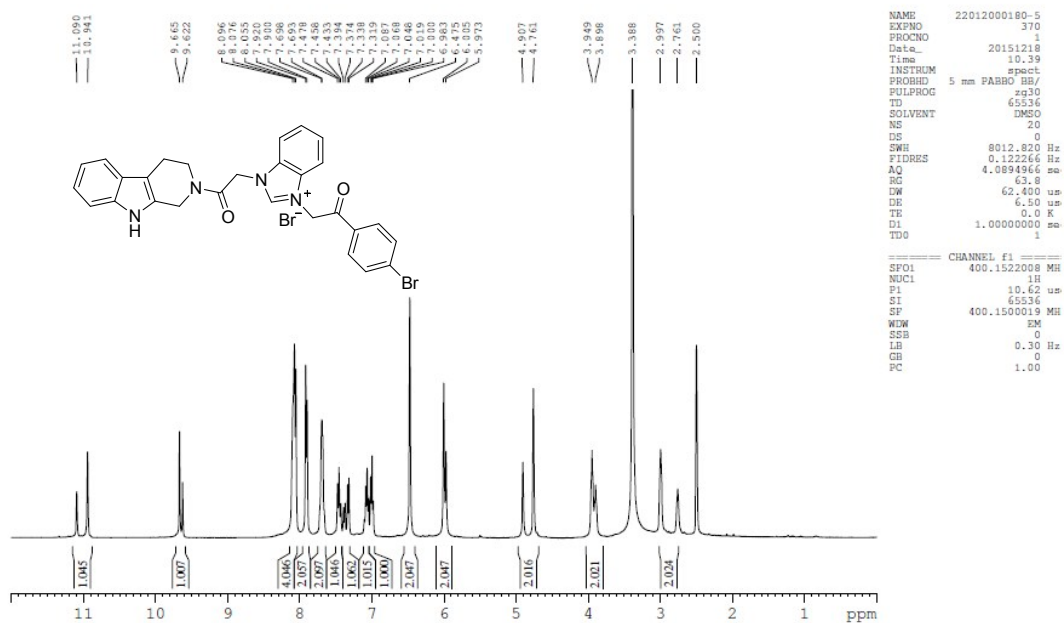

Compound 26 <sup>13</sup>C-NMR 100M DMSO

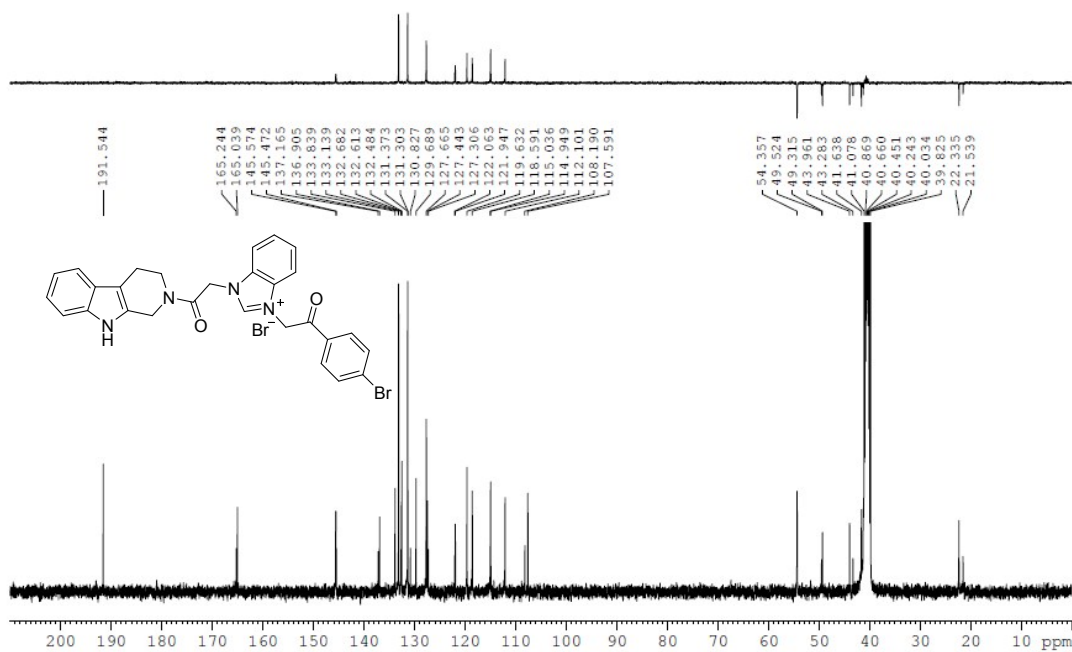



Compound 27 <sup>1</sup>H-NMR 400M DMSO

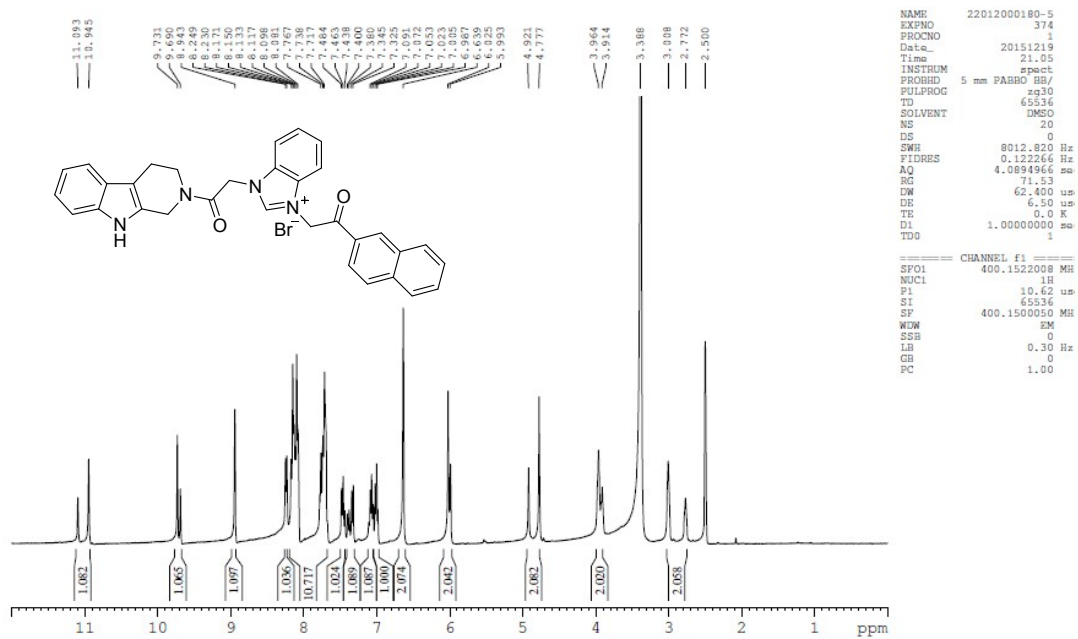

Compound 27 <sup>13</sup>C-NMR 100M DMSO

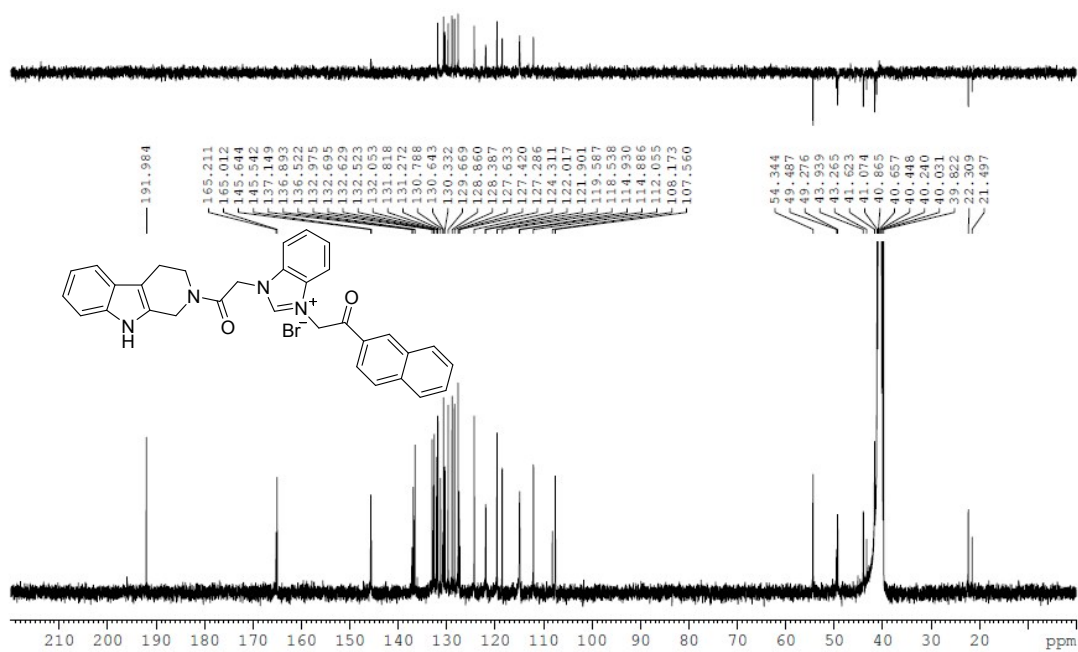

Compound 28 <sup>1</sup>H-NMR 400M DMSO

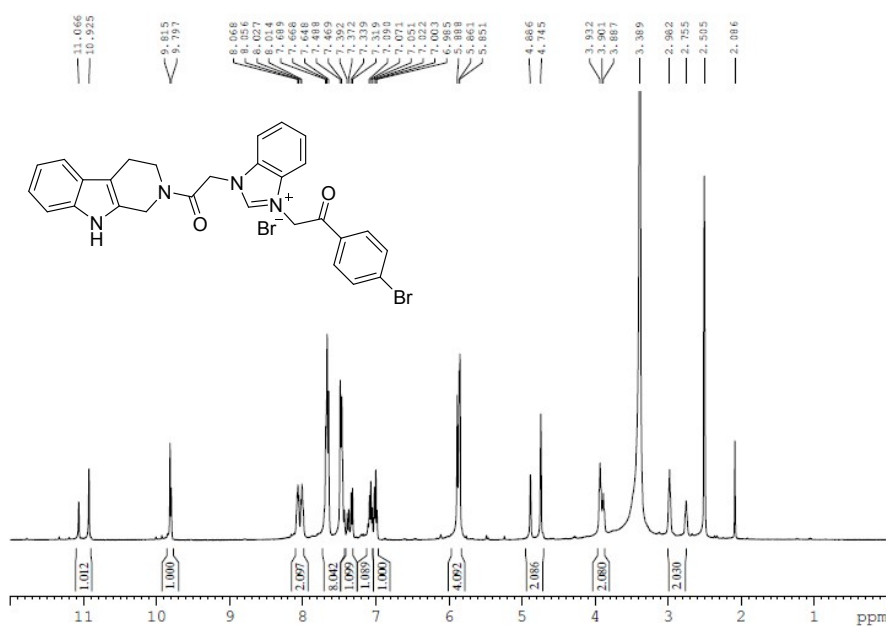

```

NAME      22012000180-5
EXPNO    361
PROCNO    1
Date_     20151219
Time      1.03
INSTRUM   spect
PROBHD    5 mm PABBO BB/
PULPROG   zg30
TD         65536
SOLVENT   DMSO
NS         20
DS         0
SWH        8012.820 Hz
FIDRES     0.122266 Hz
AQ         4.0894966 sec
RG         71.53
RC         62.400 um
DE         6.50 um
TE         0.0 K
D1         1.00000000 sec
TD0        1
===== CHANNEL f1 =====
SFO1      400.1522008 MH
NUC1       1H
P1         10.62 um
SI         65536
SF         400.1500000 MH
WDW        EM
SSB        0
LB         0.30 Hz
GB         0
PC         1.00
    
```

Compound 28 <sup>13</sup>C-NMR 100M DMSO

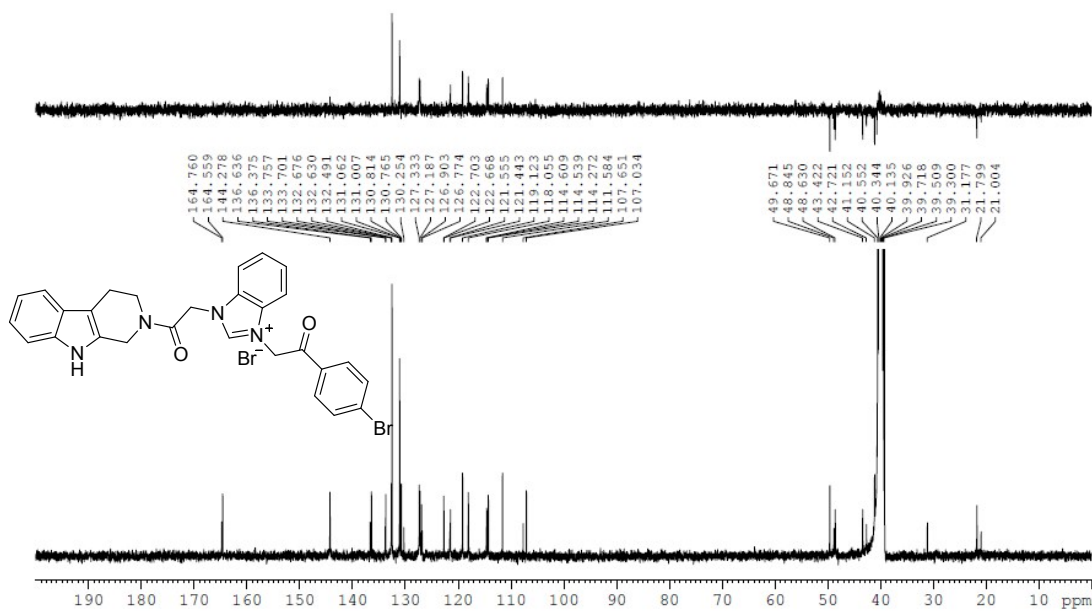

### Compound 29 <sup>1</sup>H-NMR 400M DMSO

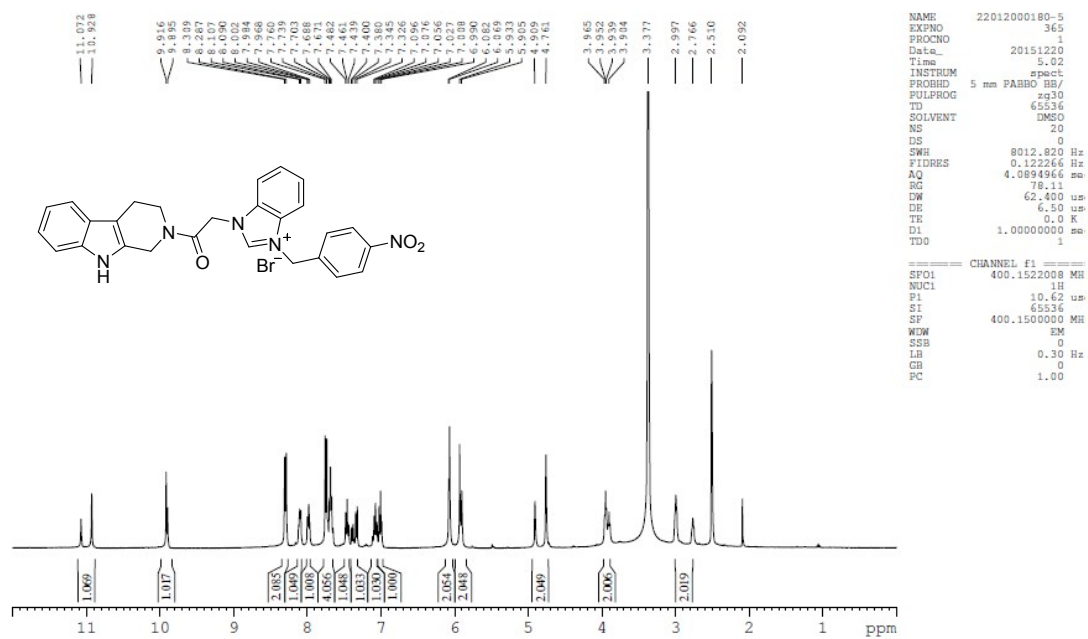

### Compound 29 <sup>13</sup>C-NMR 100M DMSO

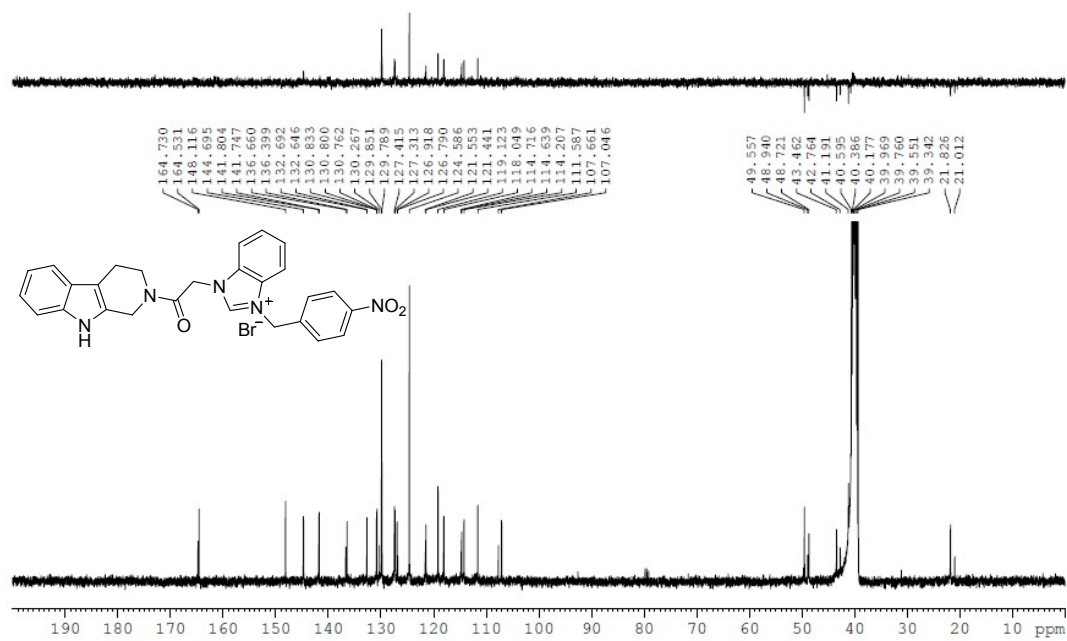

Compound **30** <sup>1</sup>H-NMR 400M DMSO

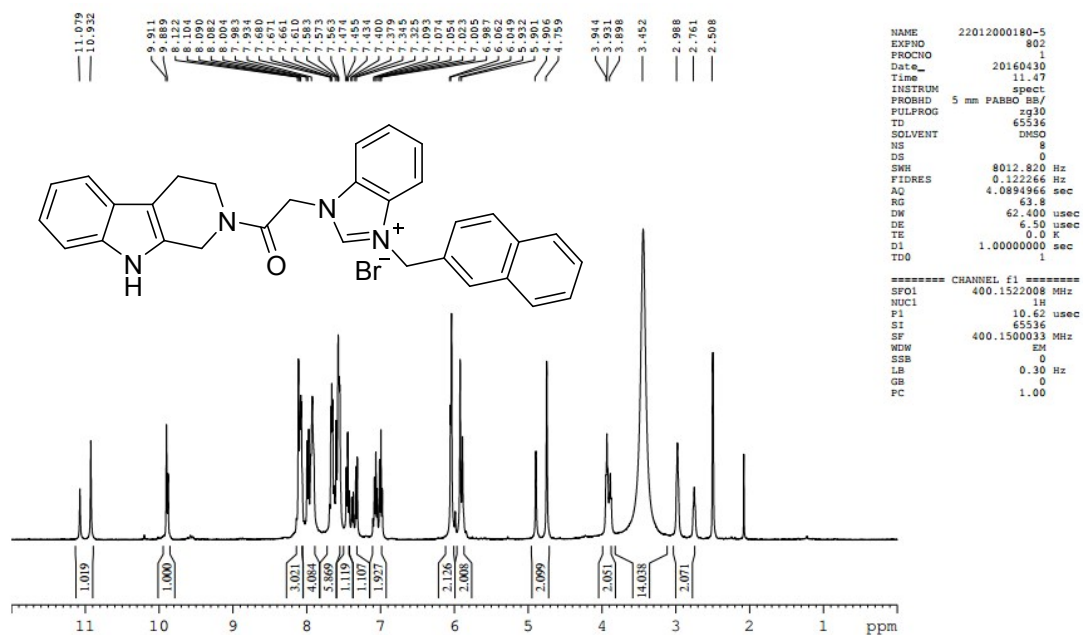

```

NAME      22012000180-5
EXPNO    802
PROCNO   1
Date_    20160430
Time     11.47
INSTRUM  spect
PROBHD   5 mm PABBO BBI
PULPROG  zg30
TD        65536
SOLVENT  DMSO
NS        8
DS        0
SWH      8012.820 Hz
FIDRES   0.122266 Hz
AQ        4.0894966 sec
RG        63.8
DW        62.400 usec
DE        6.50 usec
TE        0.0 K
D1        1.00000000 sec
TD0       1
===== CHANNEL f1 =====
SF01     400.152008 MHz
NUC1     1H
P1       10.62 usec
SI       65536
SF       400.1500033 MHz
WDW      EM
SSB      0
LB       0.30 Hz
GB       0
PC       1.00
    
```

Compound **30** <sup>13</sup>C-NMR 100M DMSO

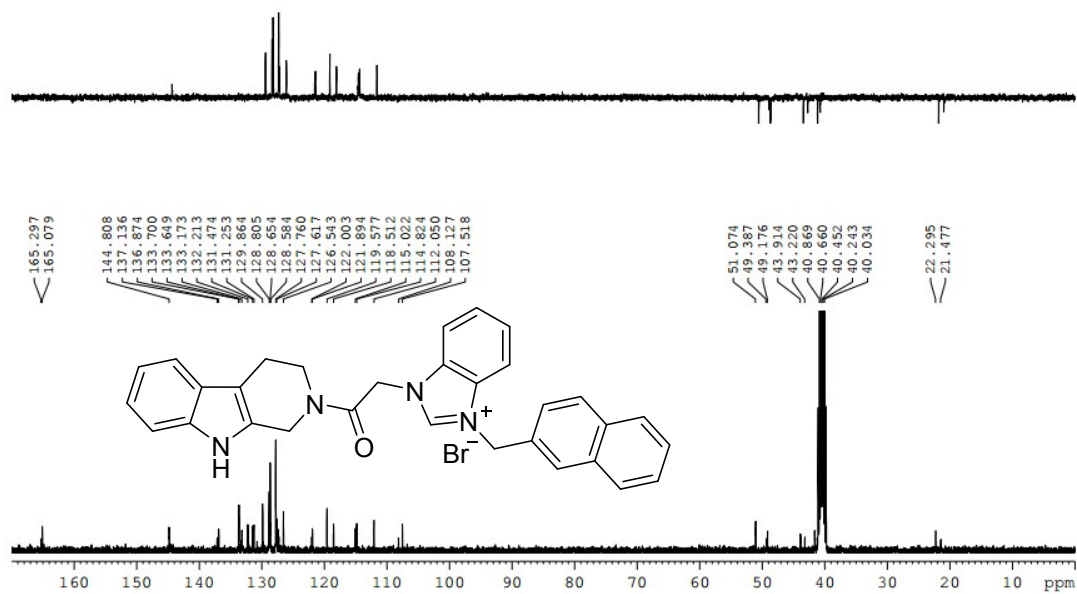

### Compound 31 <sup>1</sup>H-NMR 400M DMSO

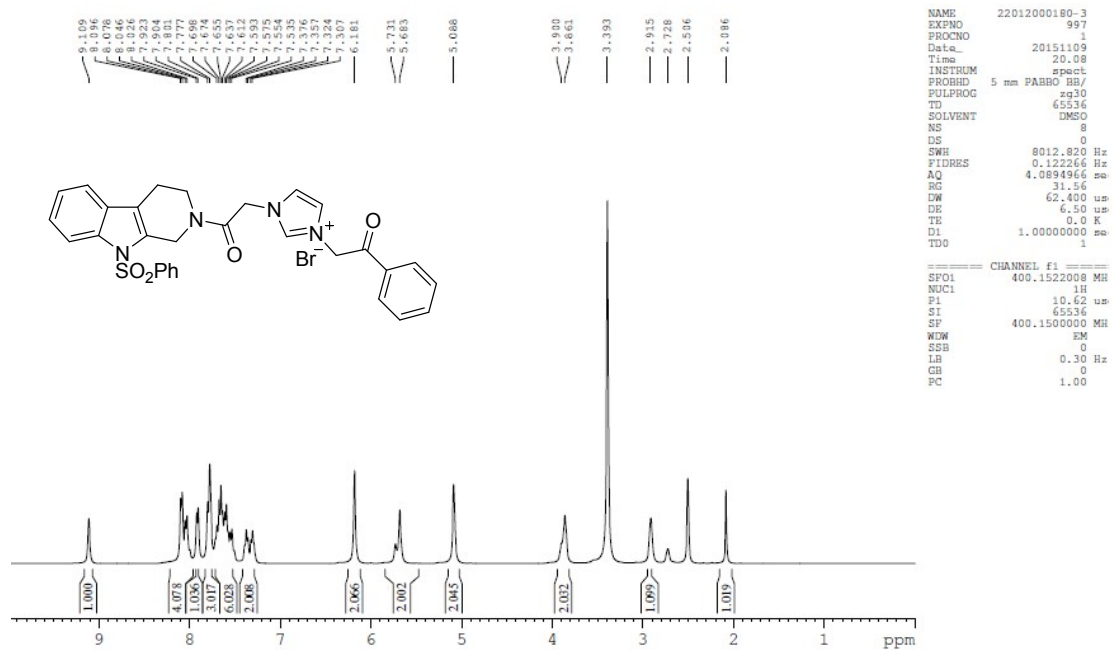

### Compound 31 <sup>13</sup>C-NMR 100M DMSO

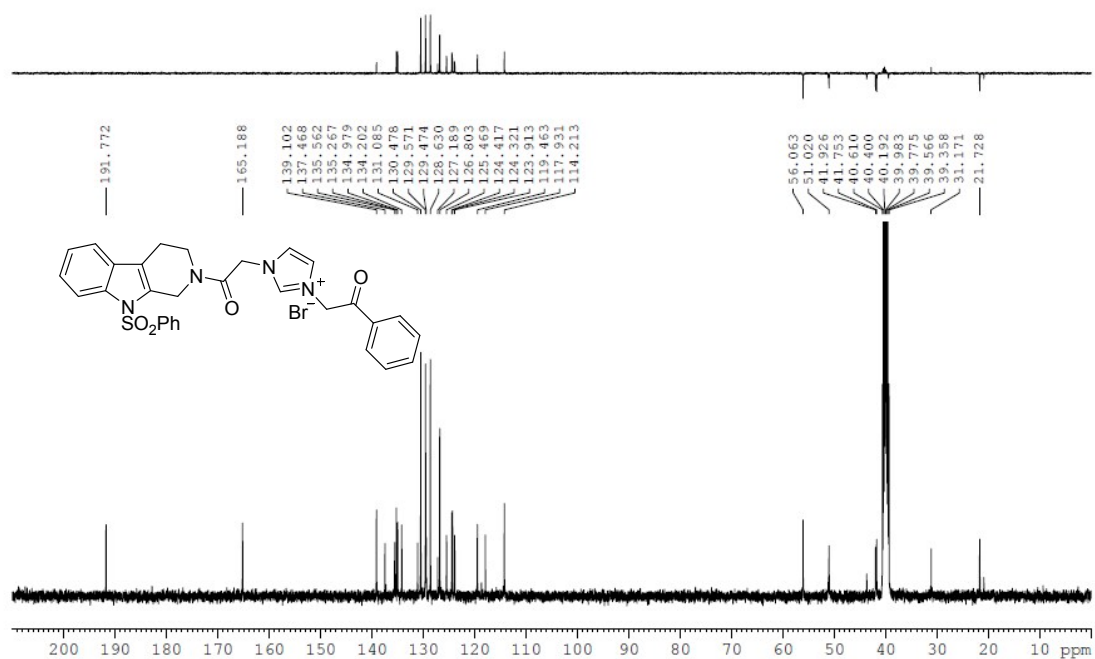

Compound **32** <sup>1</sup>H-NMR 400M DMSO

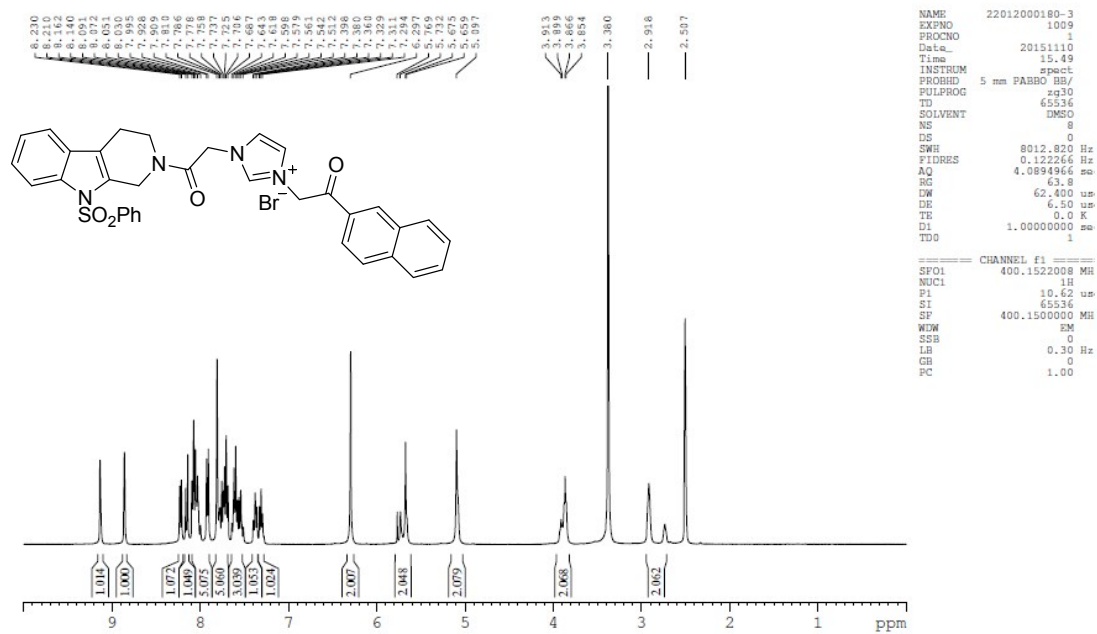

Compound **32** <sup>13</sup>C-NMR 100M DMSO

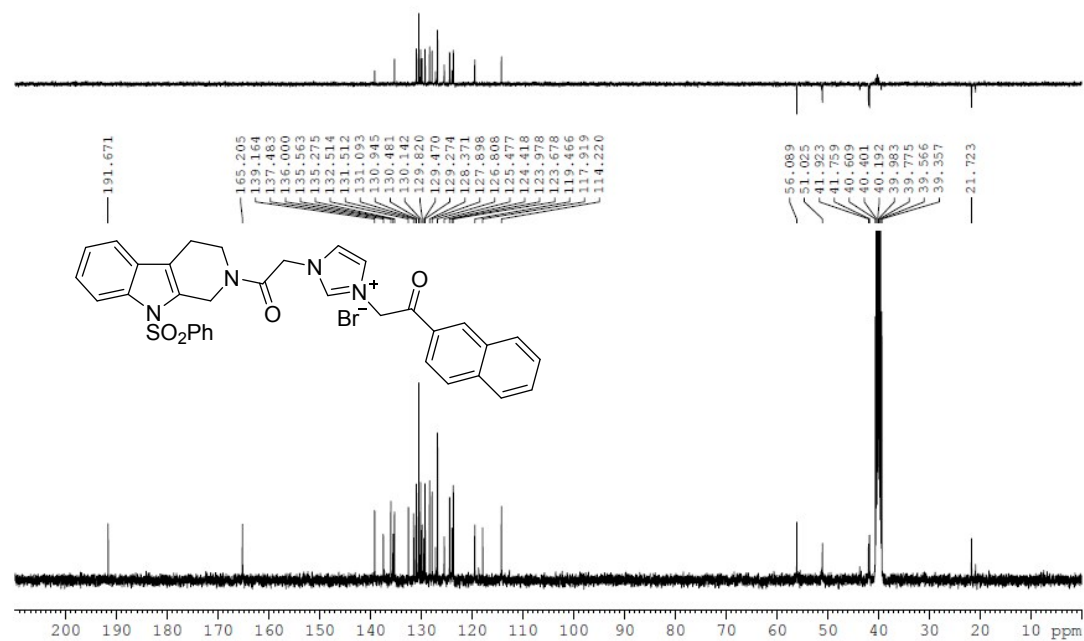

Compound 33 <sup>1</sup>H-NMR 400M DMSO

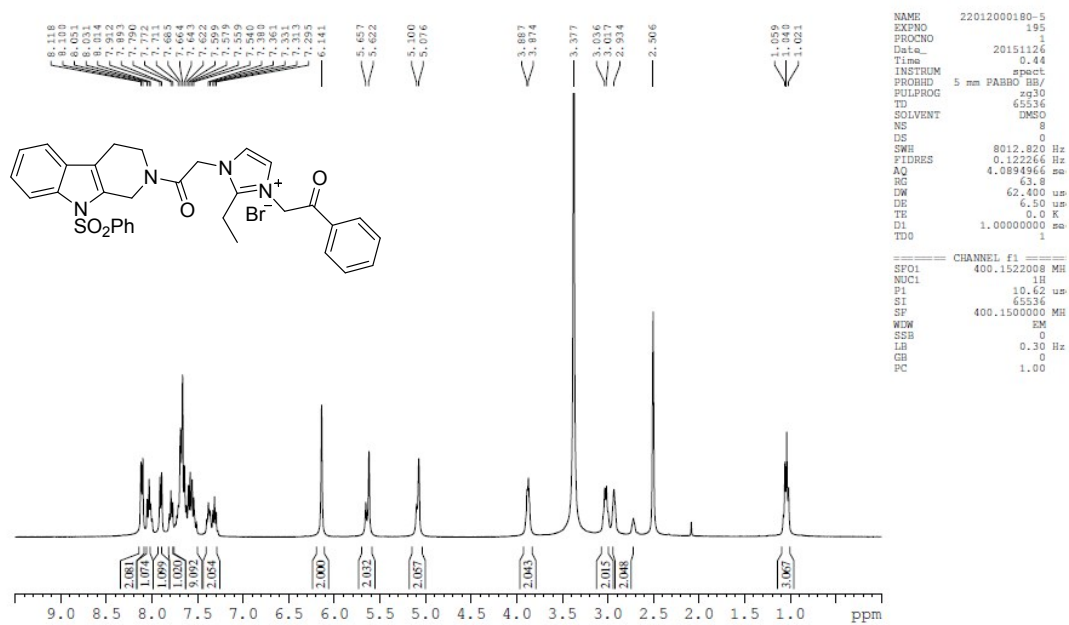

Compound 33 <sup>13</sup>C-NMR 100M DMSO

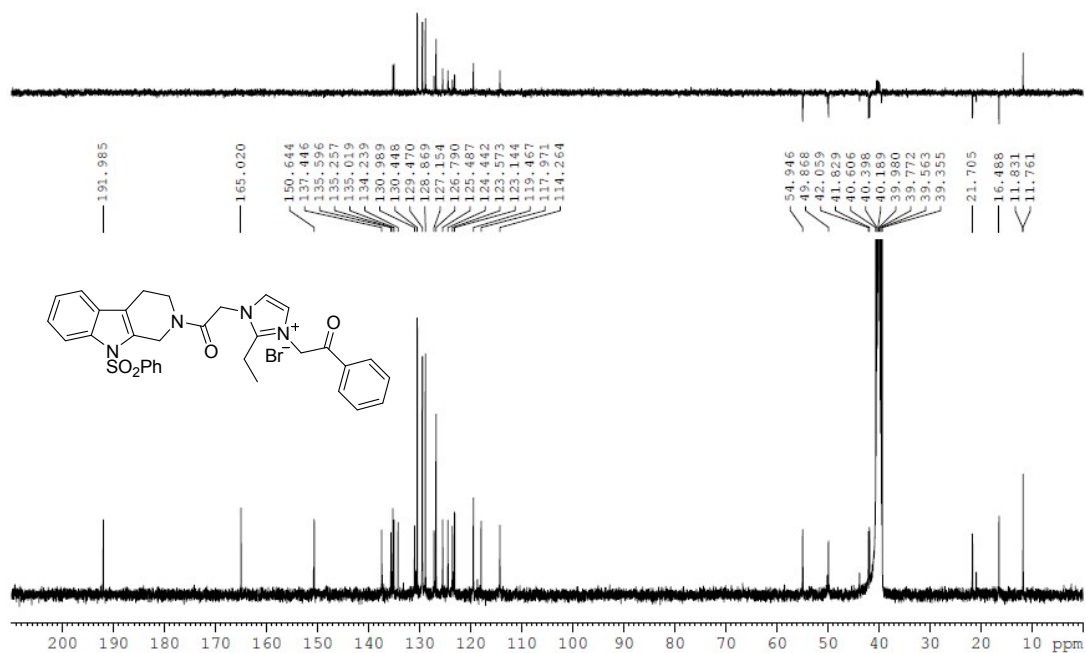

### Compound 34 <sup>1</sup>H-NMR 400M DMSO

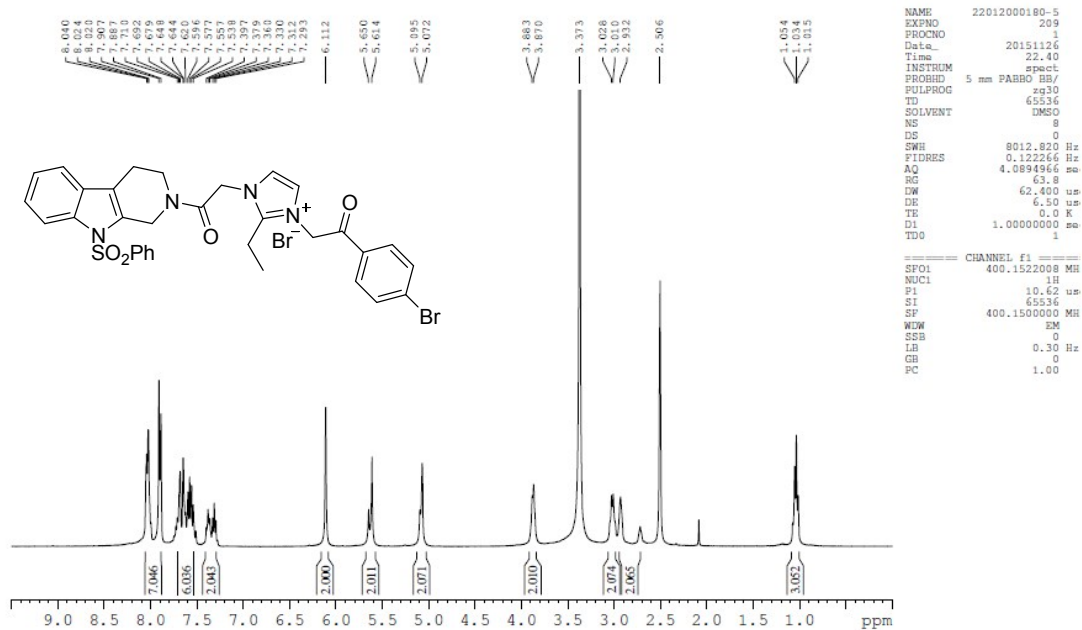

### Compound 34 <sup>13</sup>C-NMR 100M DMSO

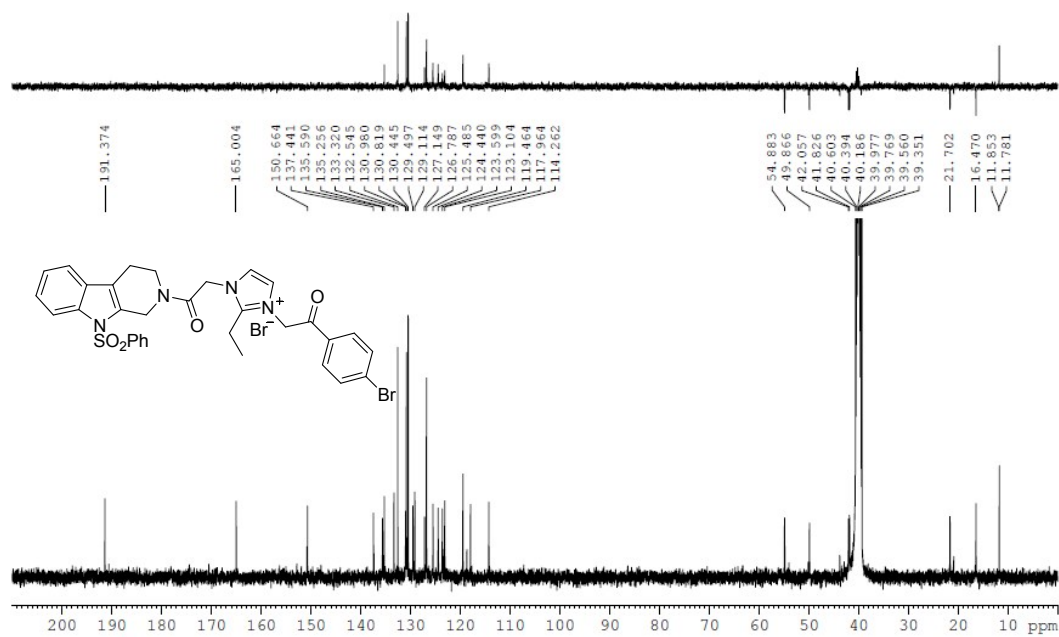



Compound **35** <sup>1</sup>H-NMR 400M DMSO

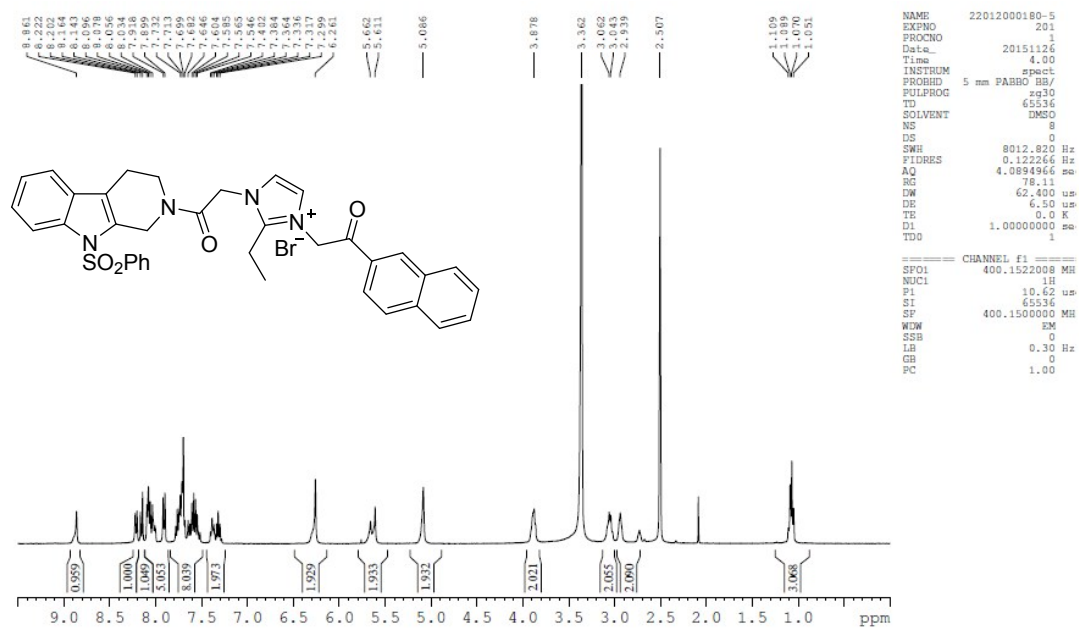

Compound **35** <sup>13</sup>C-NMR 100M DMSO

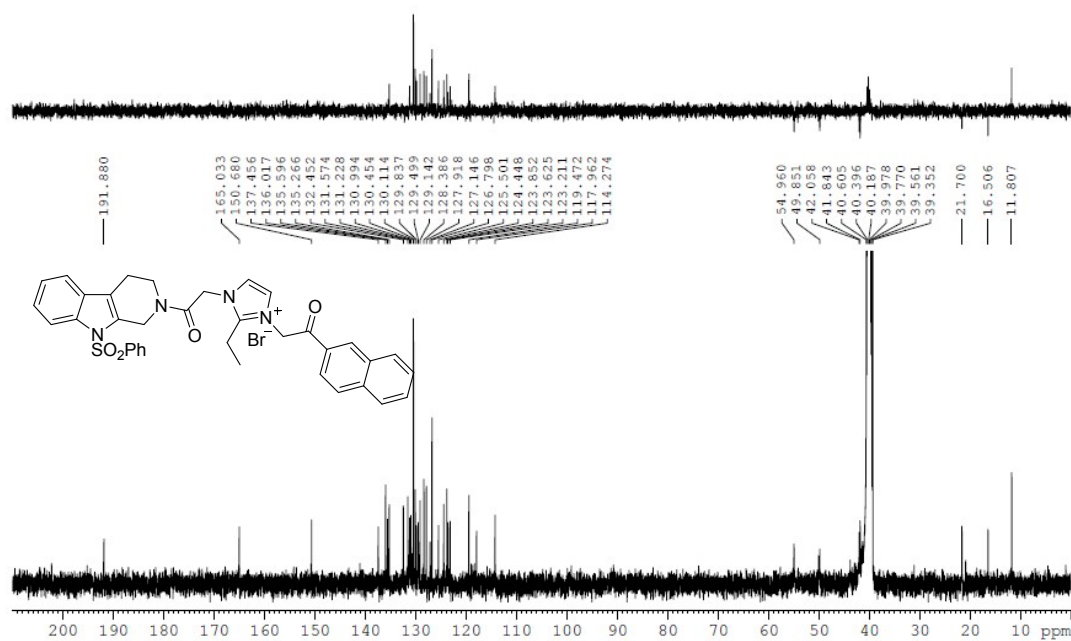

### Compound 36 <sup>1</sup>H-NMR 400M DMSO

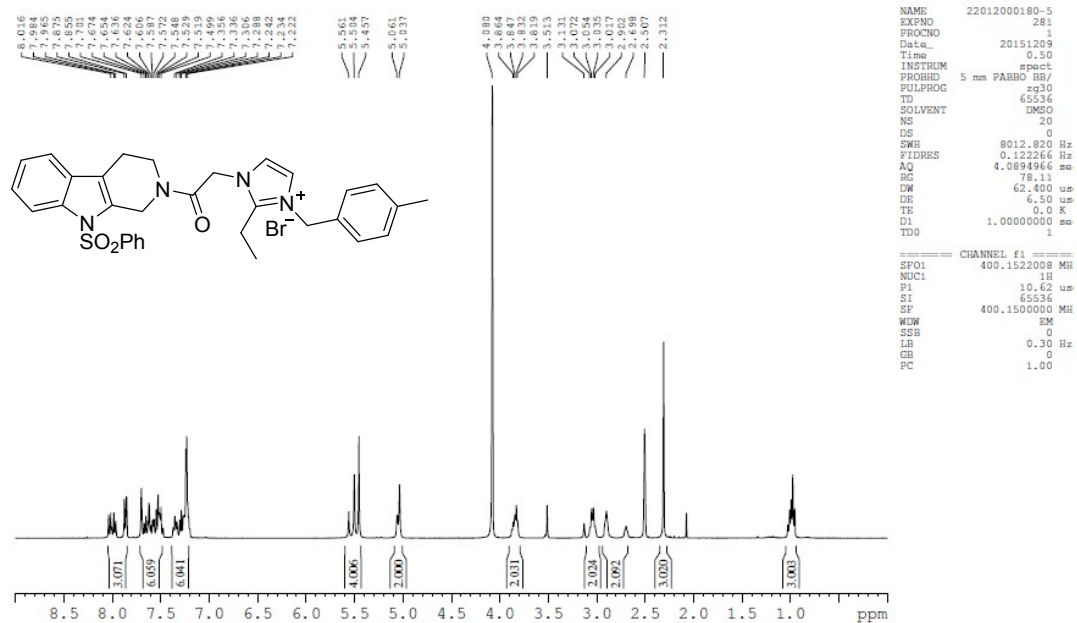

### Compound 36 <sup>13</sup>C-NMR 100M DMSO

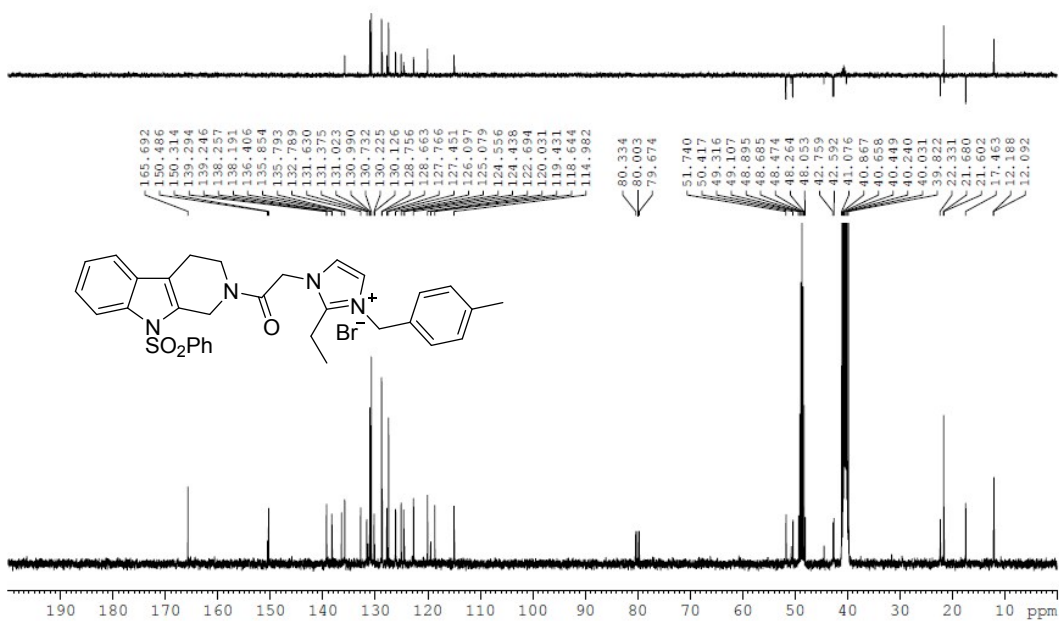

Compound 37 <sup>1</sup>H-NMR 400M DMSO

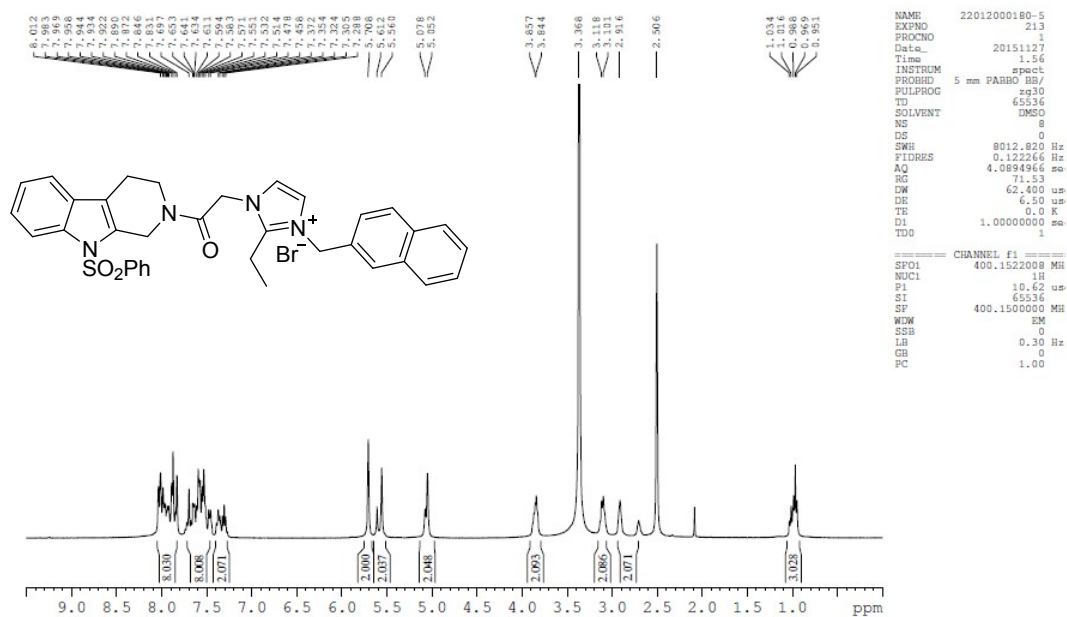

Compound 37 <sup>13</sup>C-NMR 100M DMSO

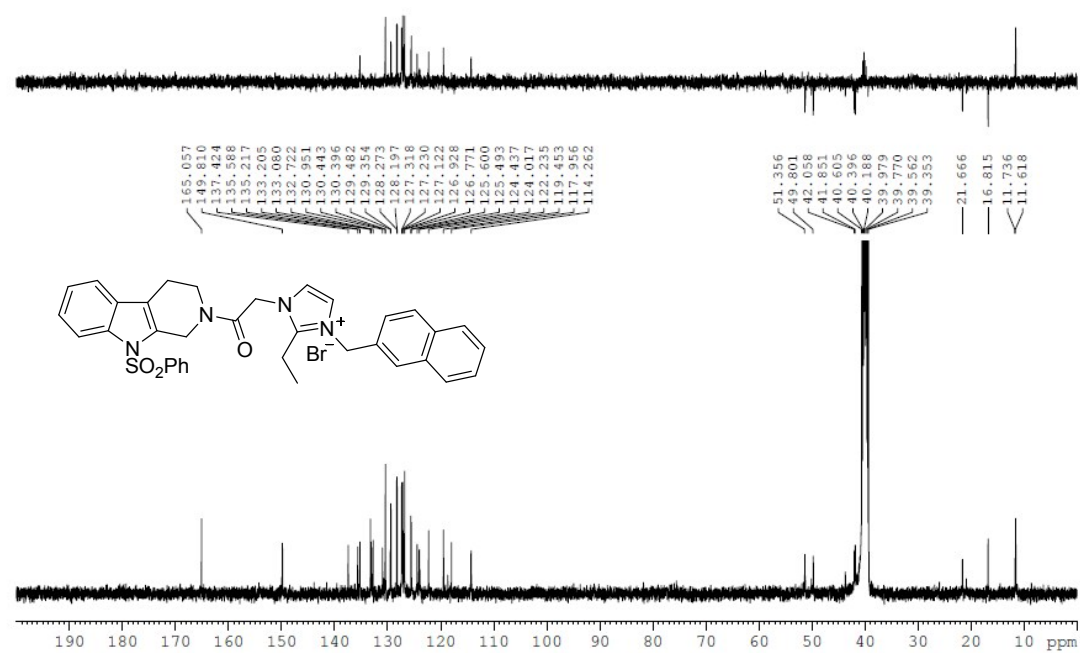

Compound **38** <sup>1</sup>H-NMR 400M DMSO

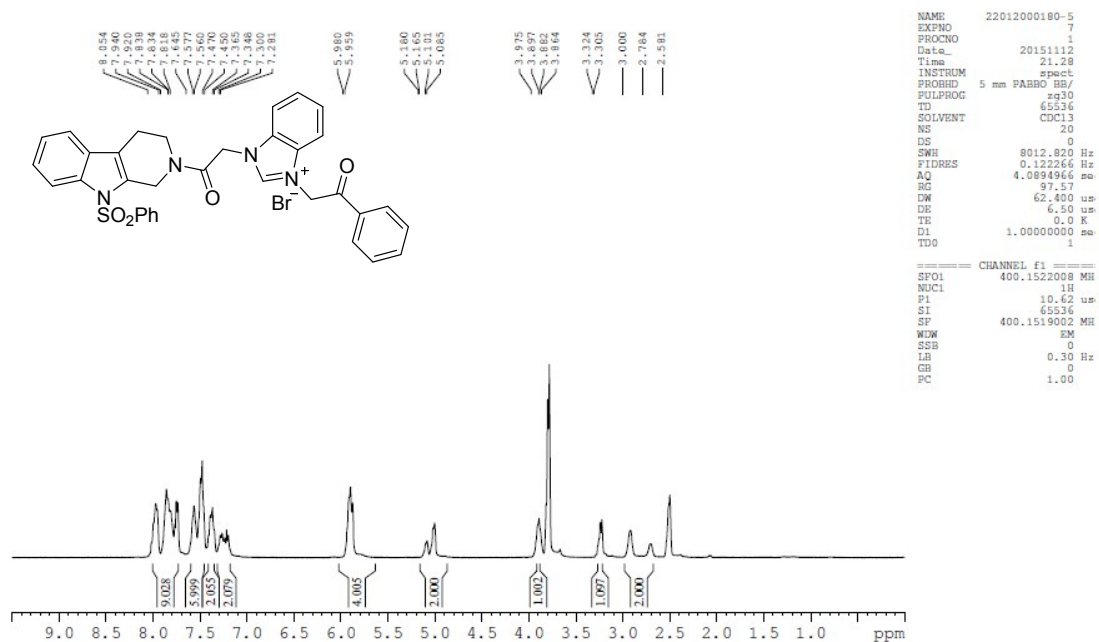

```

NAME      22012000180-5
EXPNO     1
PROCNO    1
Date_     20151112
Time      21.28
INSTRUM   spect
PROBHD    5 mm PABBO BB/
PULPROG   zg30
TD         65536
SOLVENT   CDCl3
NS         20
DS         0
SWH        8012.820 Hz
FIDRES     0.122266 Hz
AQ         4.0894966 ms
RG         97.57
SQ         62.400 us
DE         6.50 us
TE         0.0 K
D1         1.00000000 ms
TD0        1
===== CHANNEL f1 =====
SFO1      400.1522008 MHz
NUC1       1H
P1         10.62 us
SI         65536
SF         400.1519002 MHz
WDEW      EM
SSB        0
LB         0.30 Hz
GB         0
PC         1.00
    
```

Compound **38** <sup>13</sup>C-NMR 100M DMSO

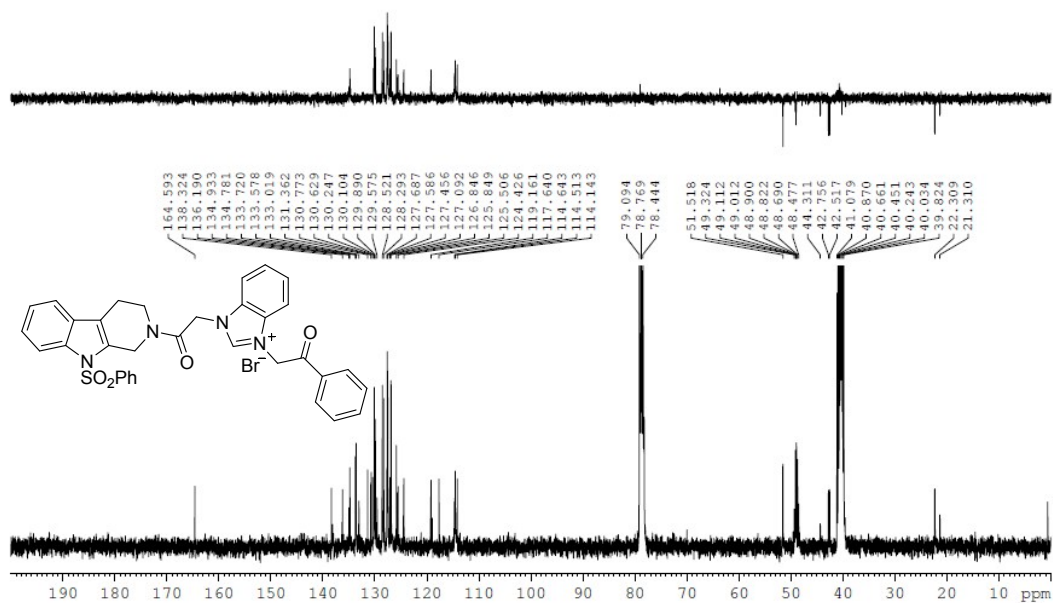

Compound **39** <sup>1</sup>H-NMR 400M DMSO

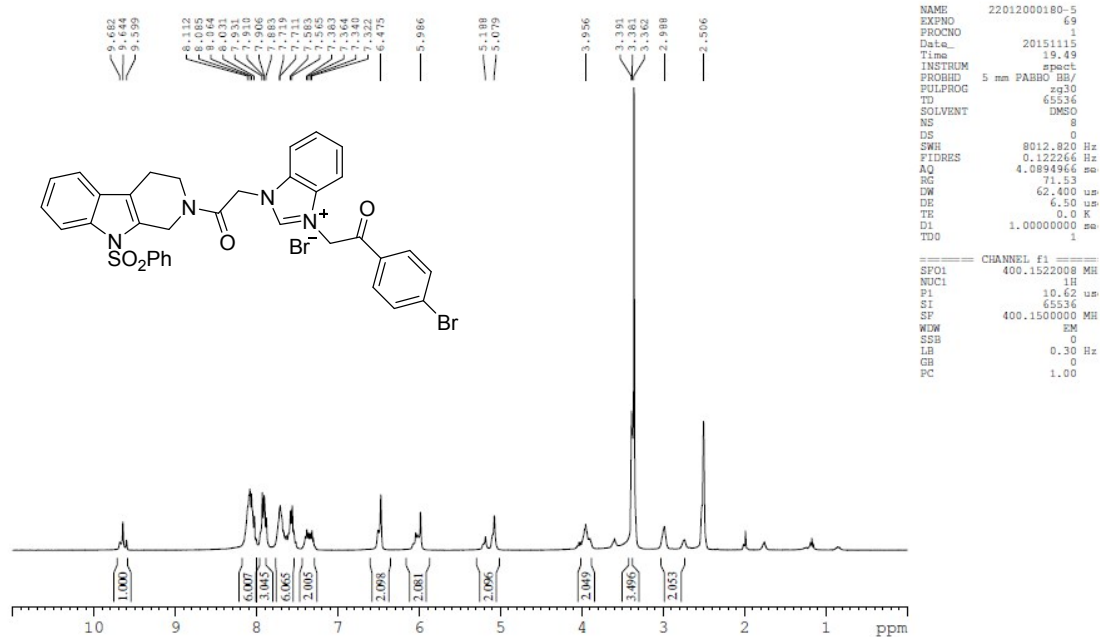

Compound **39** <sup>13</sup>C-NMR 100M DMSO

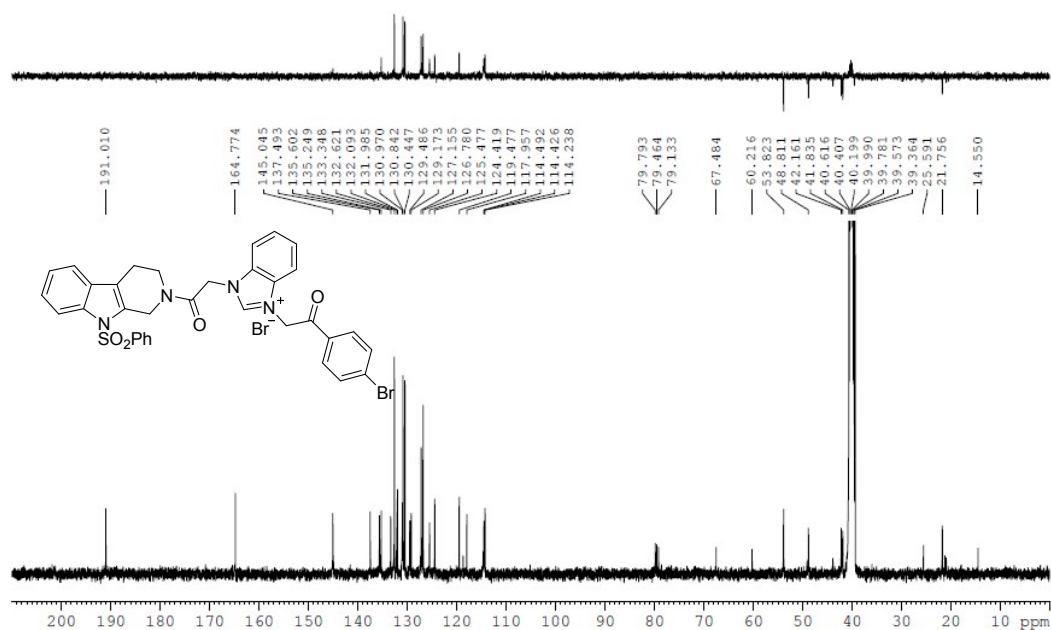

Compound **40** <sup>1</sup>H-NMR 400M DMSO

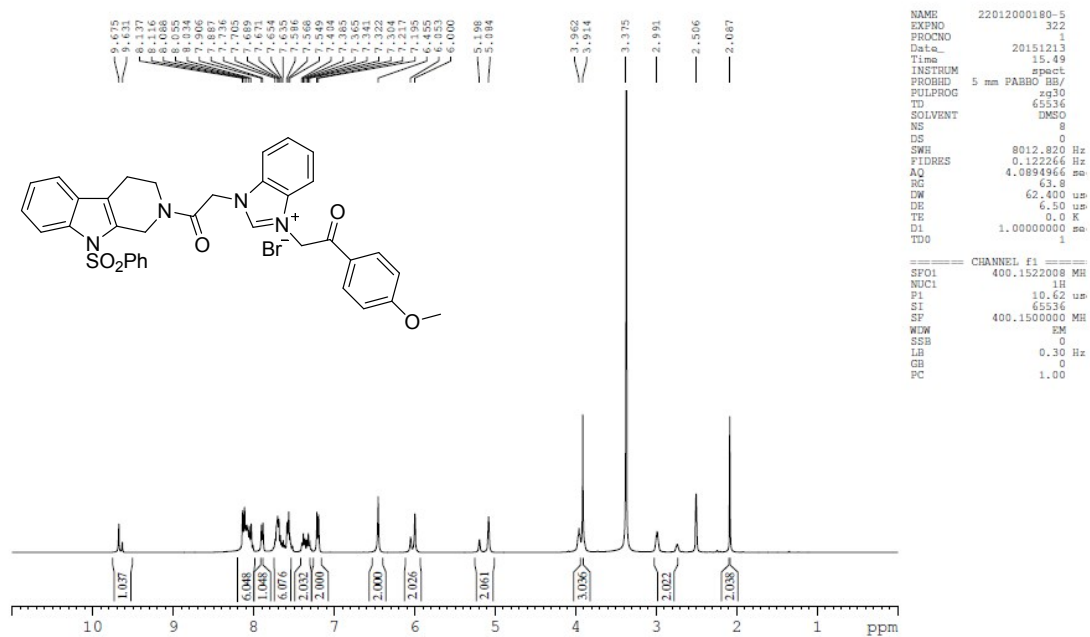

Compound **40** <sup>13</sup>C-NMR 100M DMSO

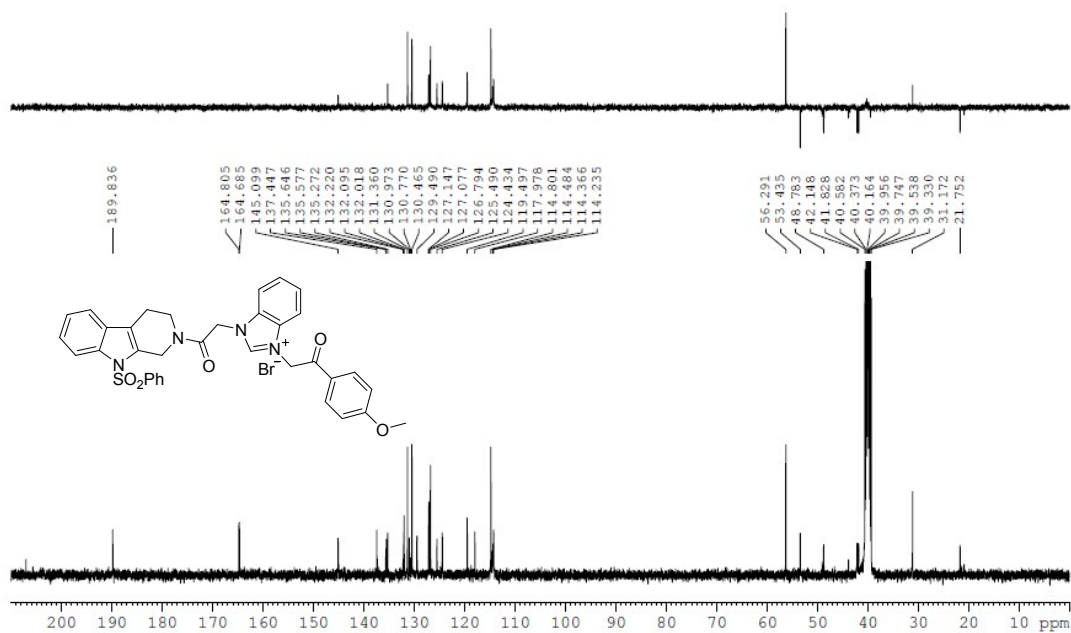

Compound 41 <sup>1</sup>H-NMR 400M DMSO

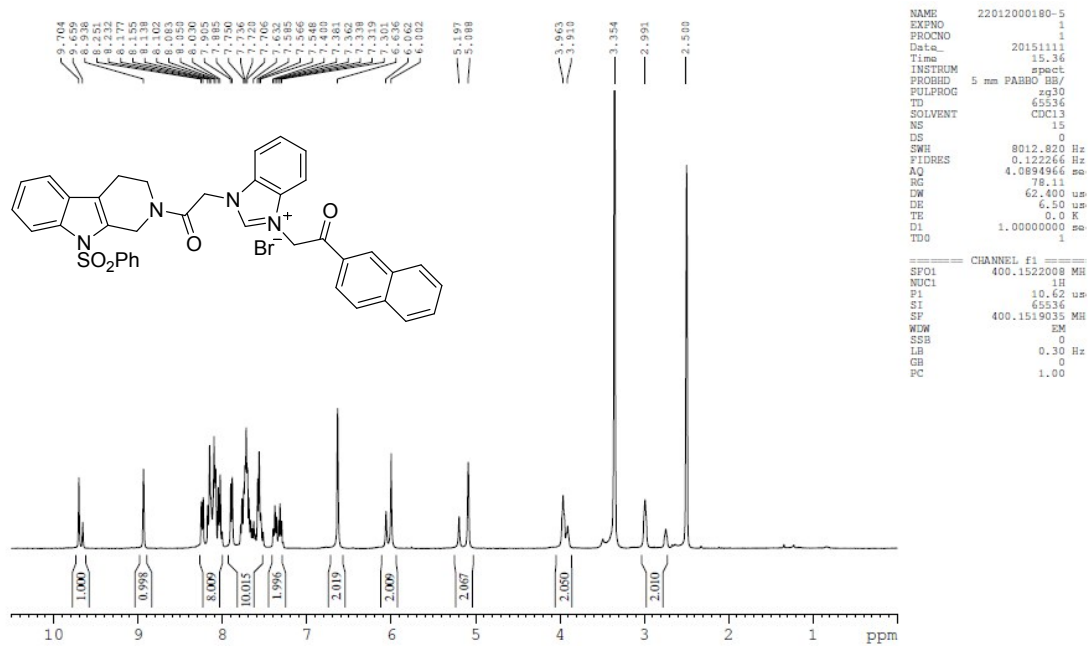

Compound 41 <sup>13</sup>C-NMR 100M DMSO

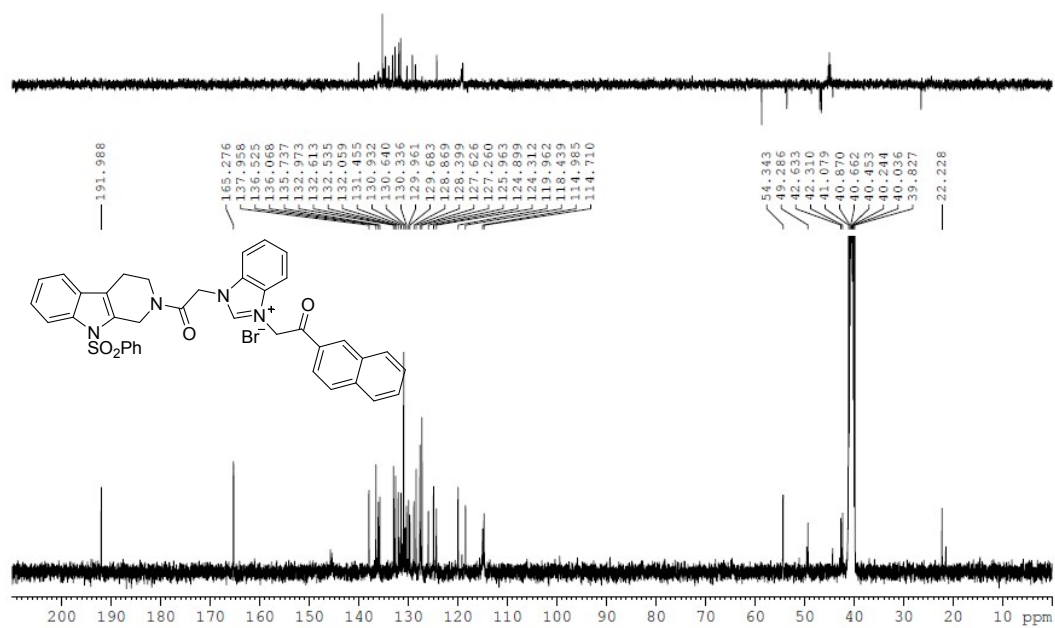

Compound 42 <sup>1</sup>H-NMR 400M DMSO

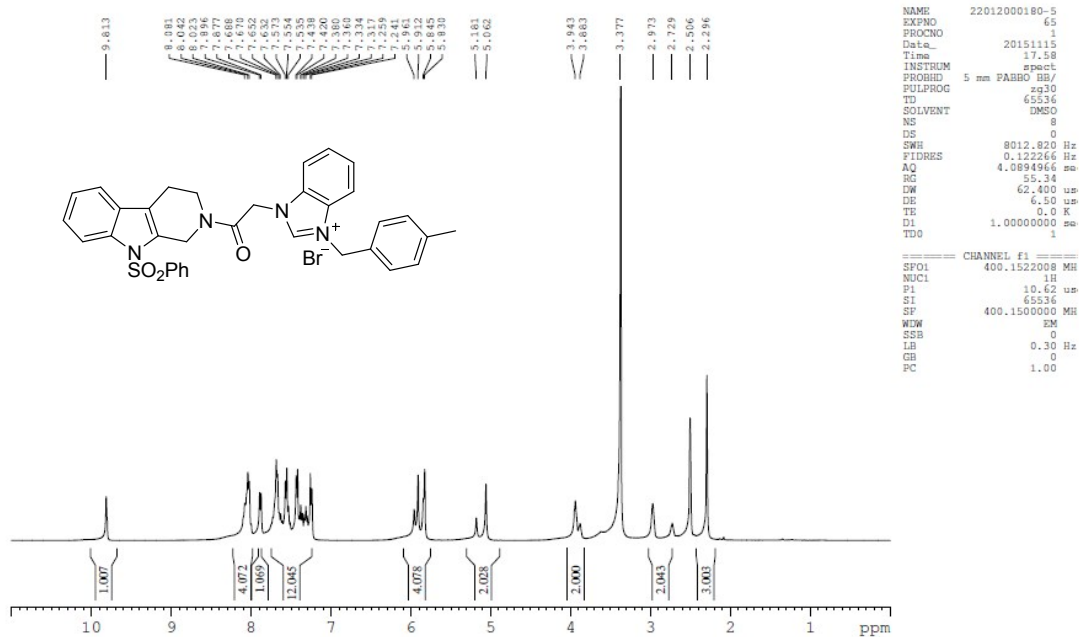

Compound 42 <sup>13</sup>C-NMR 100M DMSO

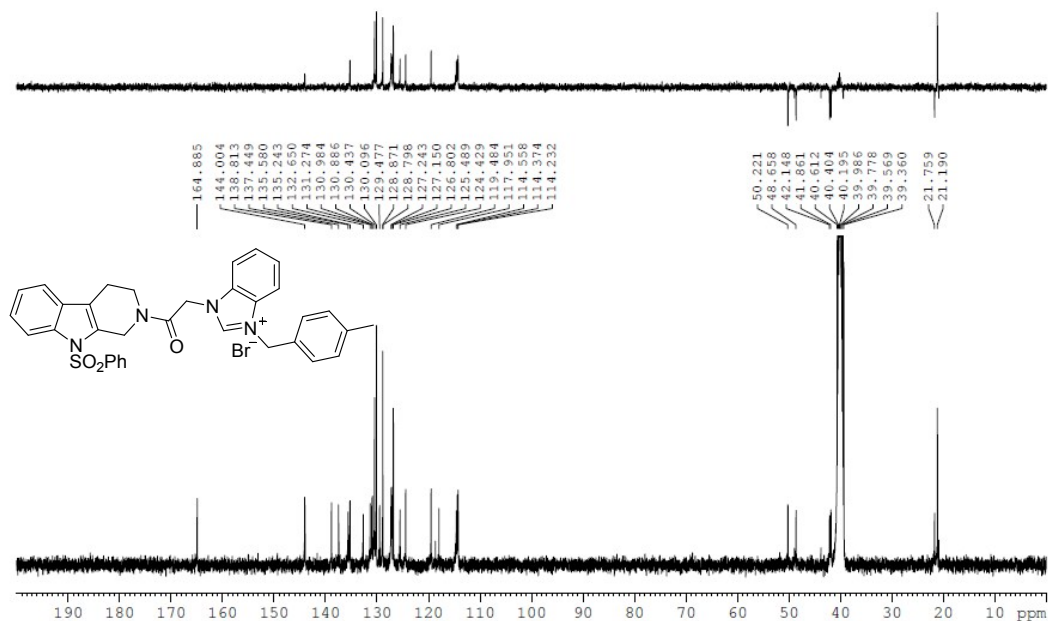



Compound 43 <sup>1</sup>H-NMR 400M DMSO

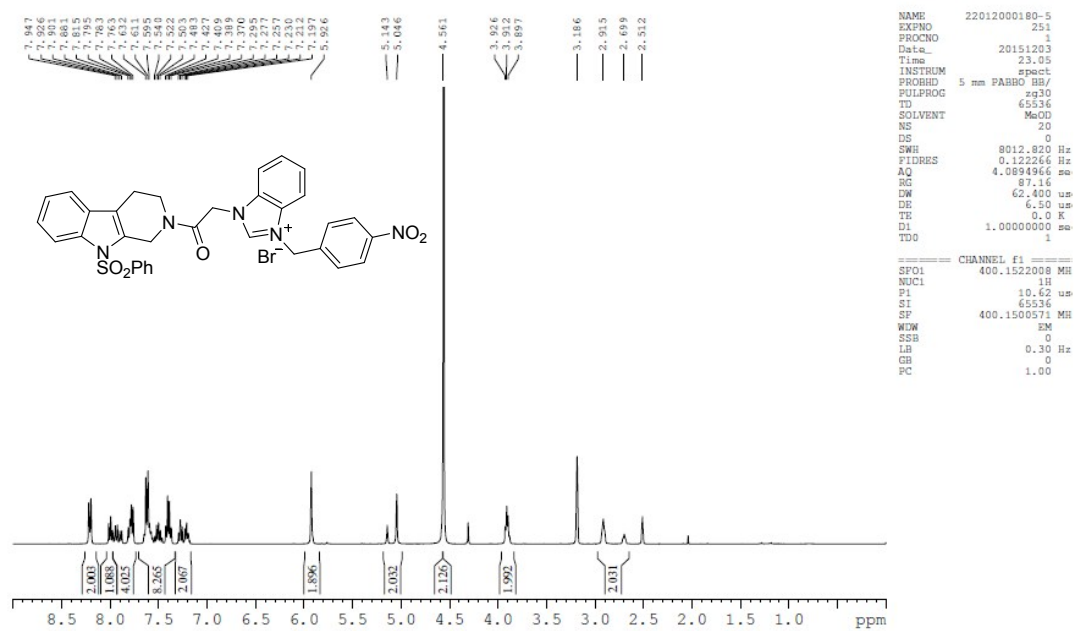

Compound 43 <sup>13</sup>C-NMR 100M DMSO

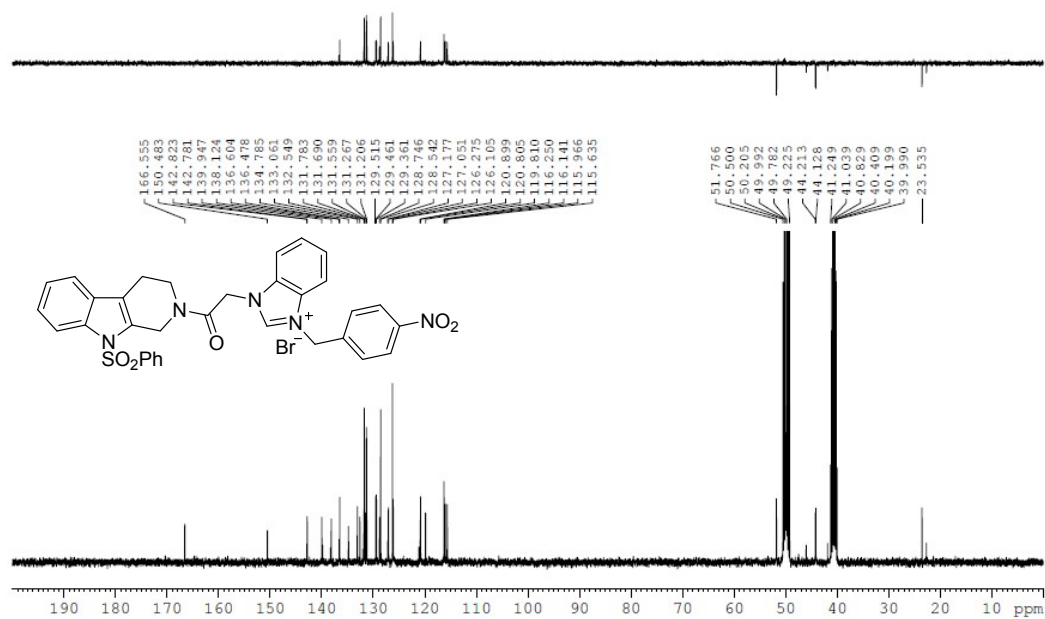

Compound 44 <sup>1</sup>H-NMR 400M DMSO

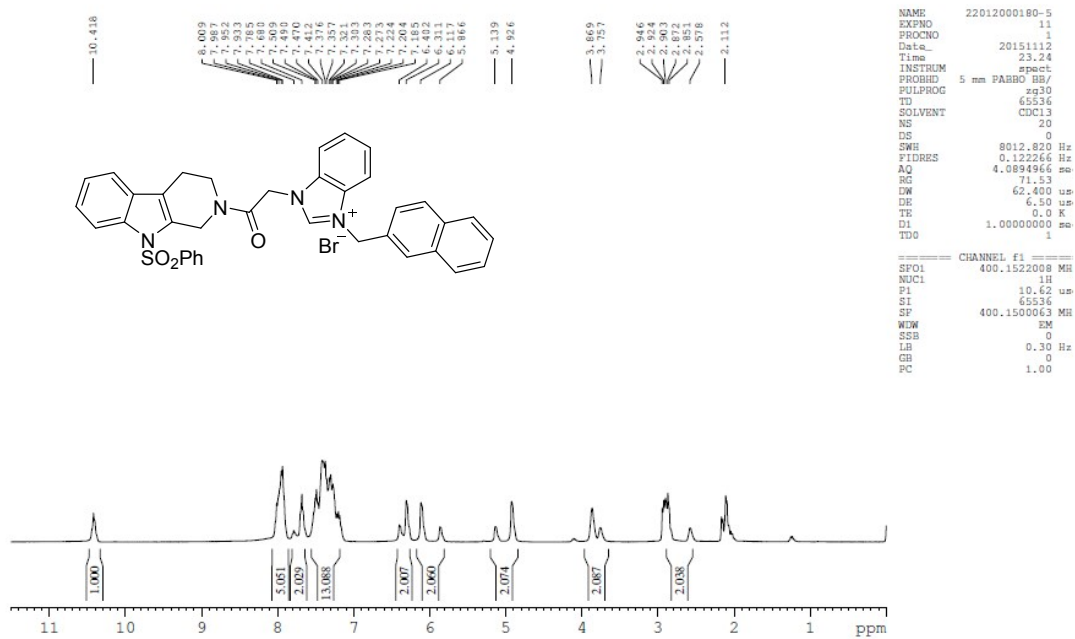

Compound 44 <sup>13</sup>C-NMR 100M DMSO

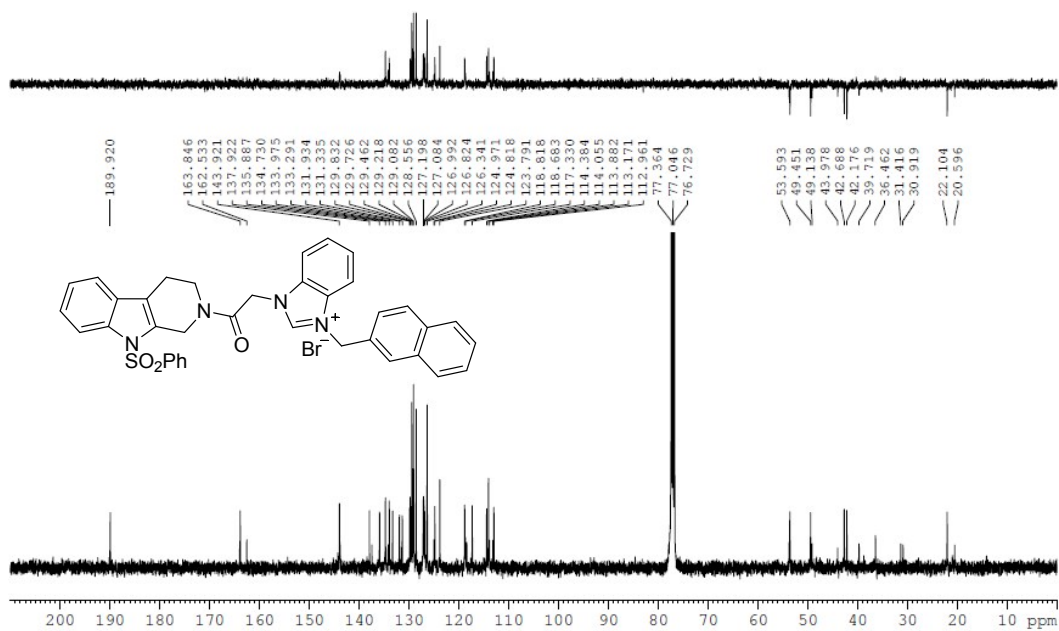

Compound 45 <sup>1</sup>H-NMR 400M DMSO

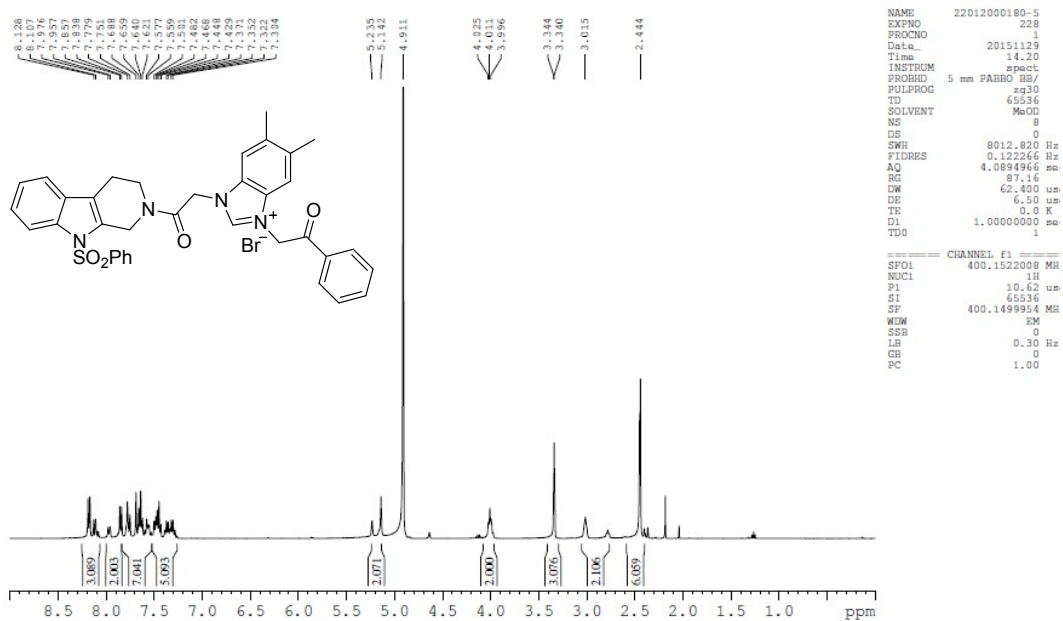

Compound 45 <sup>13</sup>C-NMR 100M DMSO

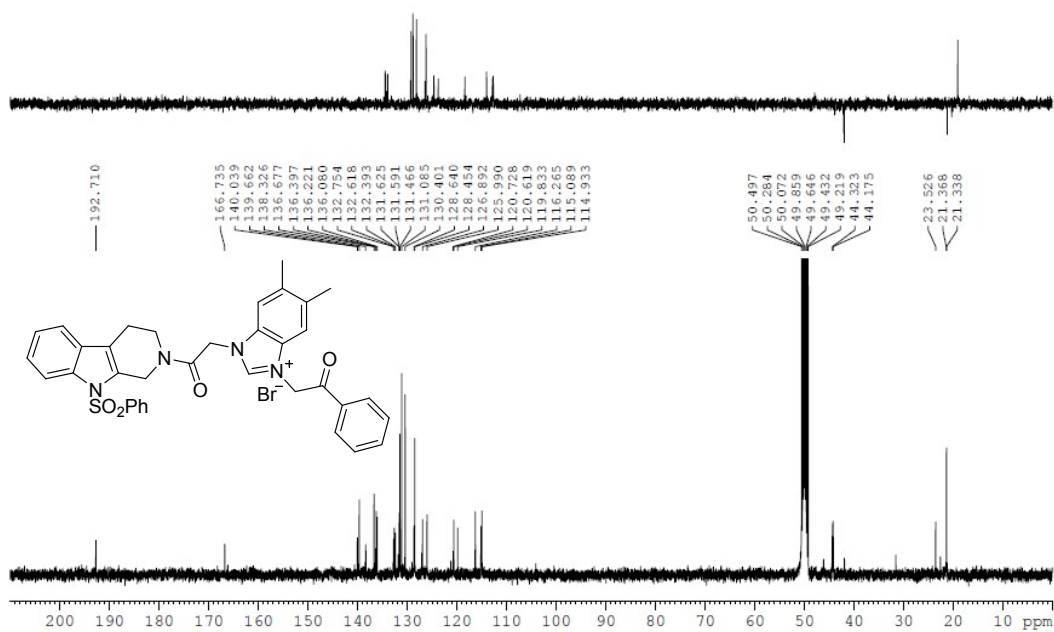

Compound 46 <sup>1</sup>H-NMR 400M DMSO

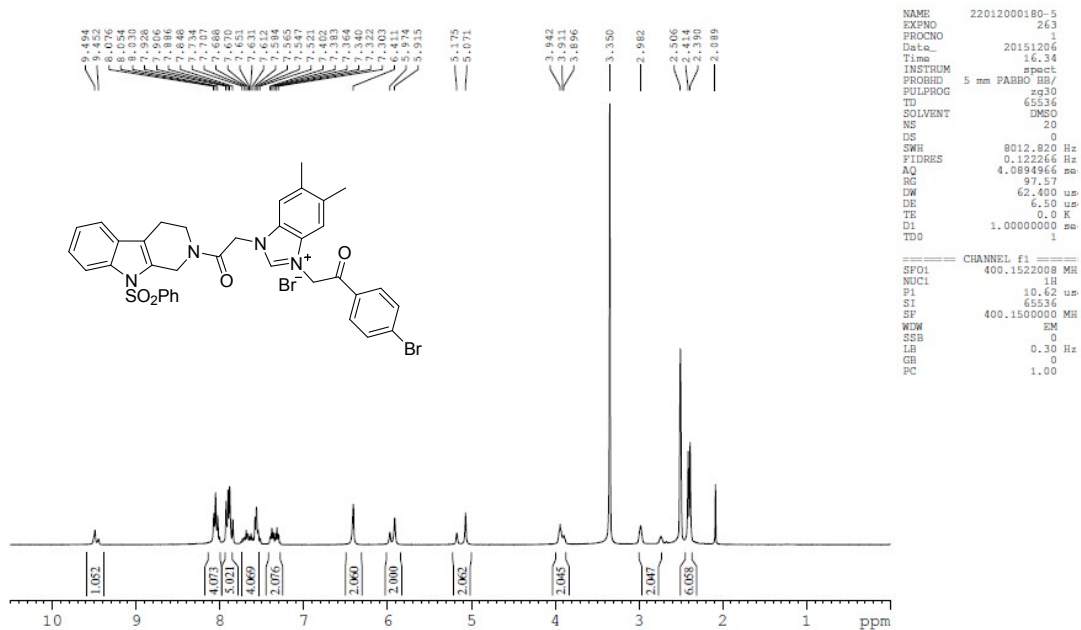

Compound 46 <sup>13</sup>C-NMR 100M DMSO

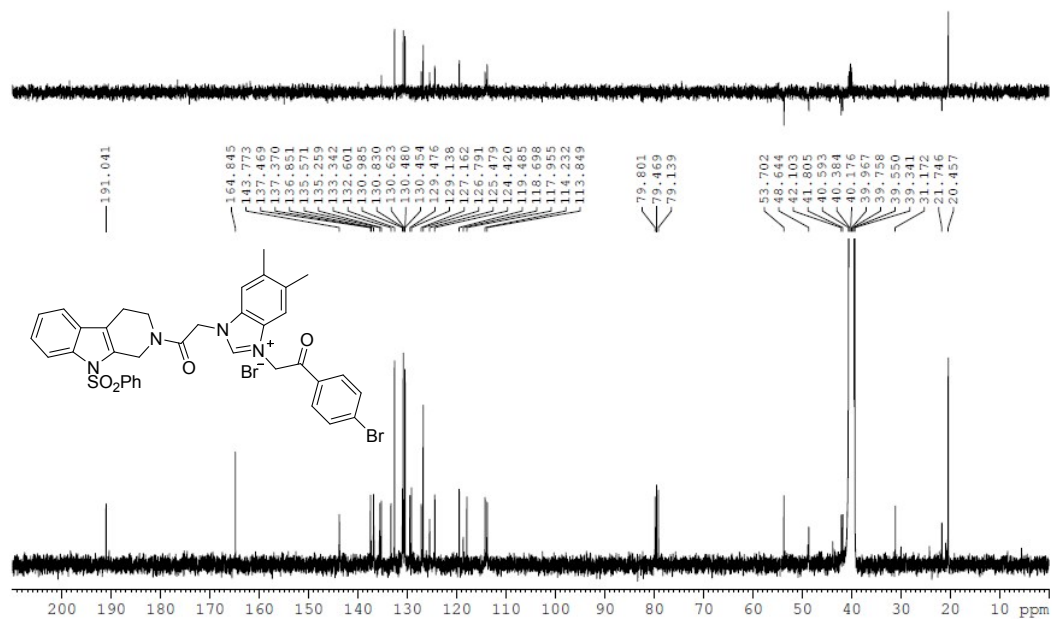

Compound 47 <sup>1</sup>H-NMR 400M DMSO

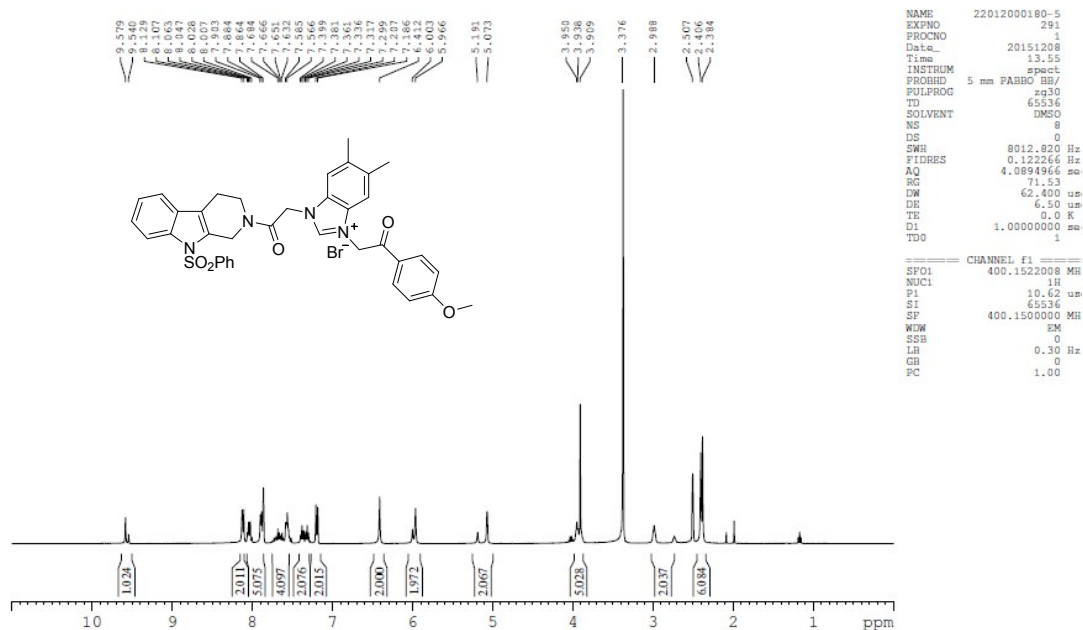

Compound 47 <sup>13</sup>C-NMR 100M DMSO

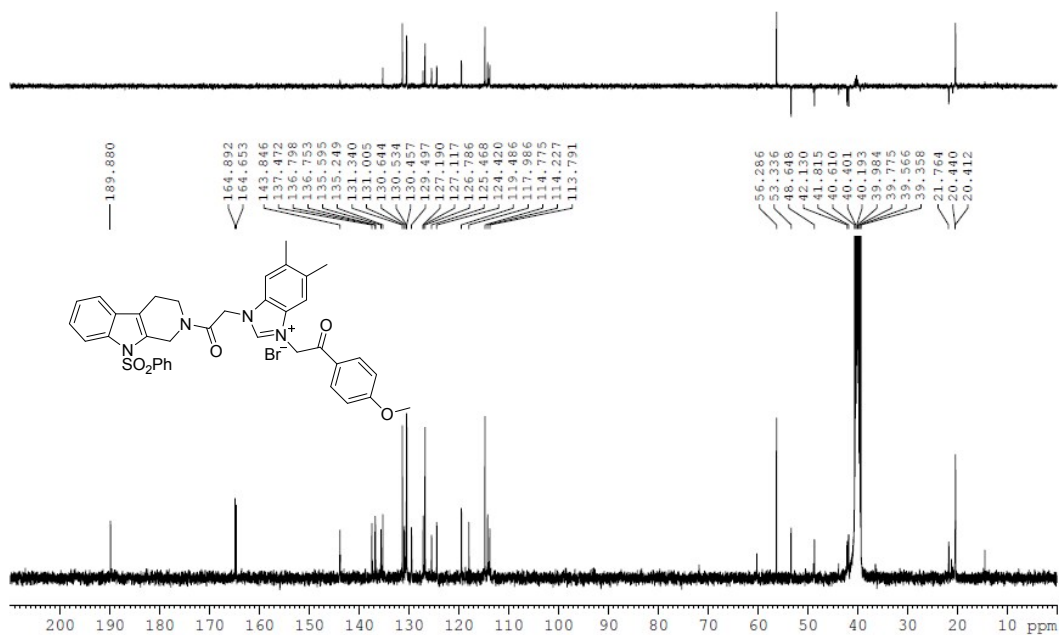

Compound 48 <sup>1</sup>H-NMR 400M DMSO

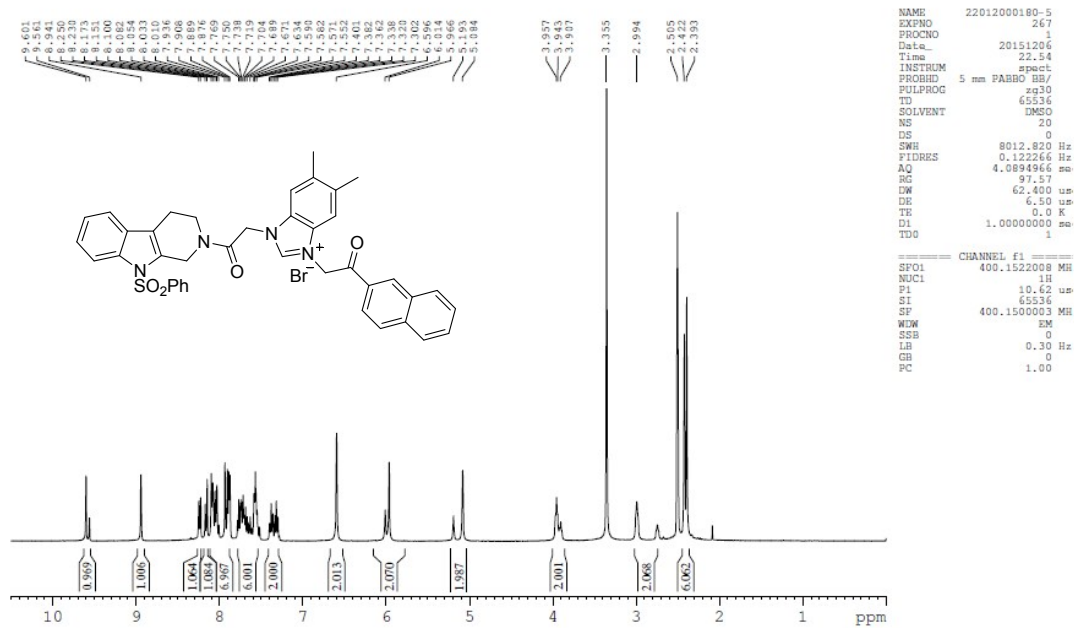

Compound 48 <sup>13</sup>C-NMR 100M DMSO

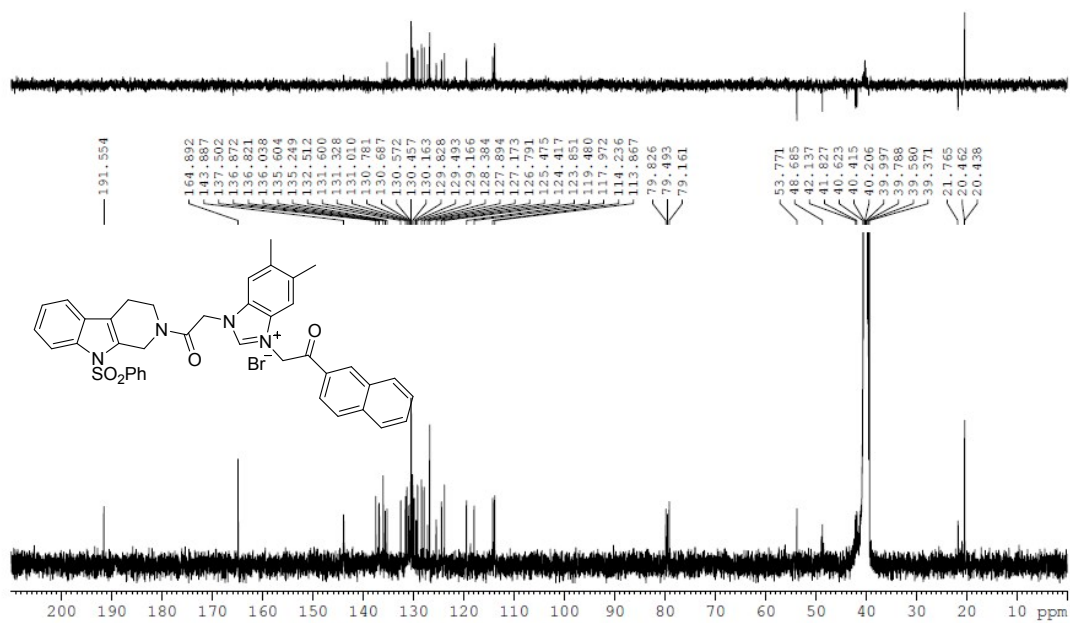



Compound **50** <sup>1</sup>H-NMR 400M DMSO

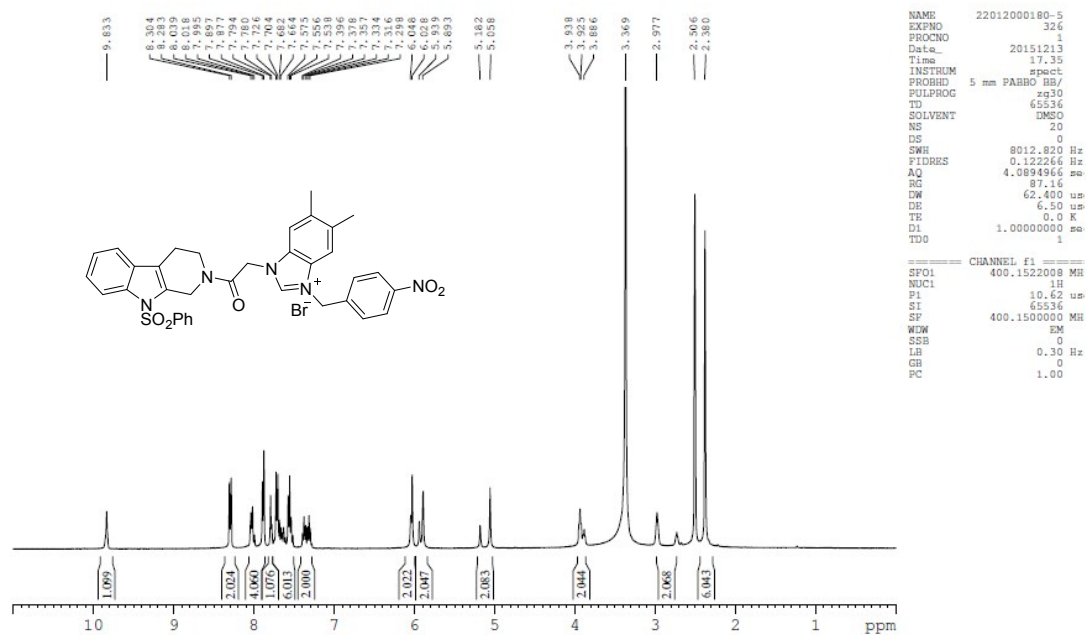

Compound **50** <sup>13</sup>C-NMR 100M DMSO

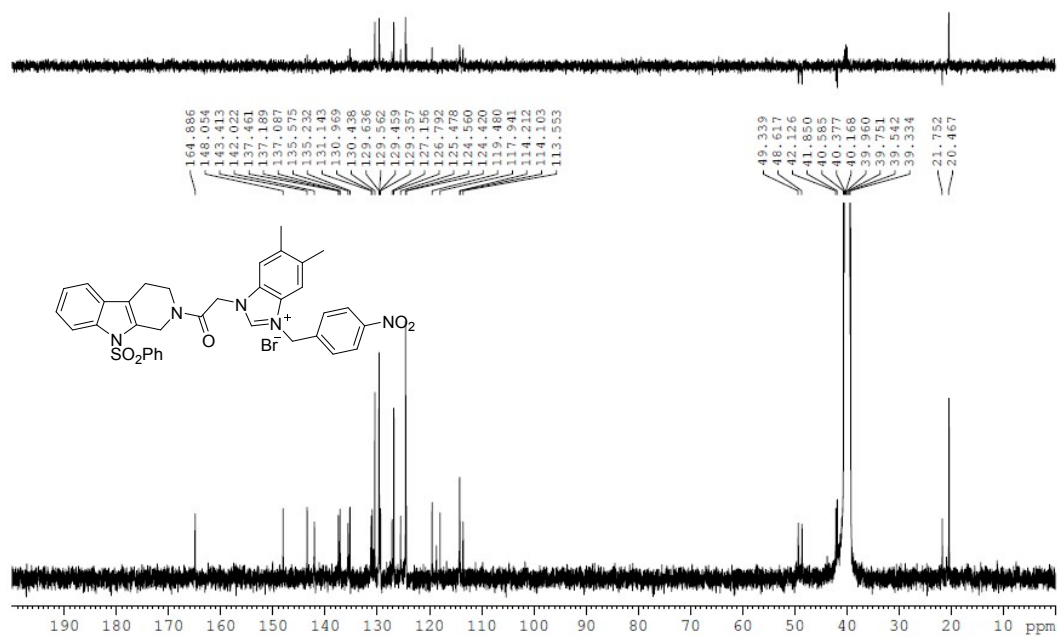



Compound **51** <sup>1</sup>H-NMR 400M DMSO

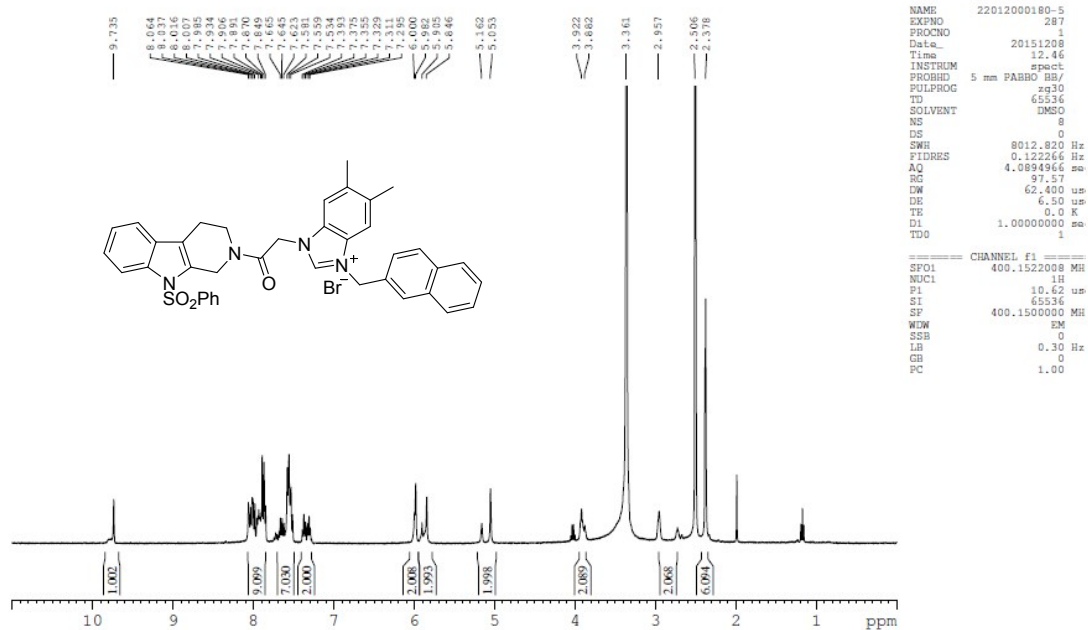

Compound **51** <sup>13</sup>C-NMR 100M DMSO

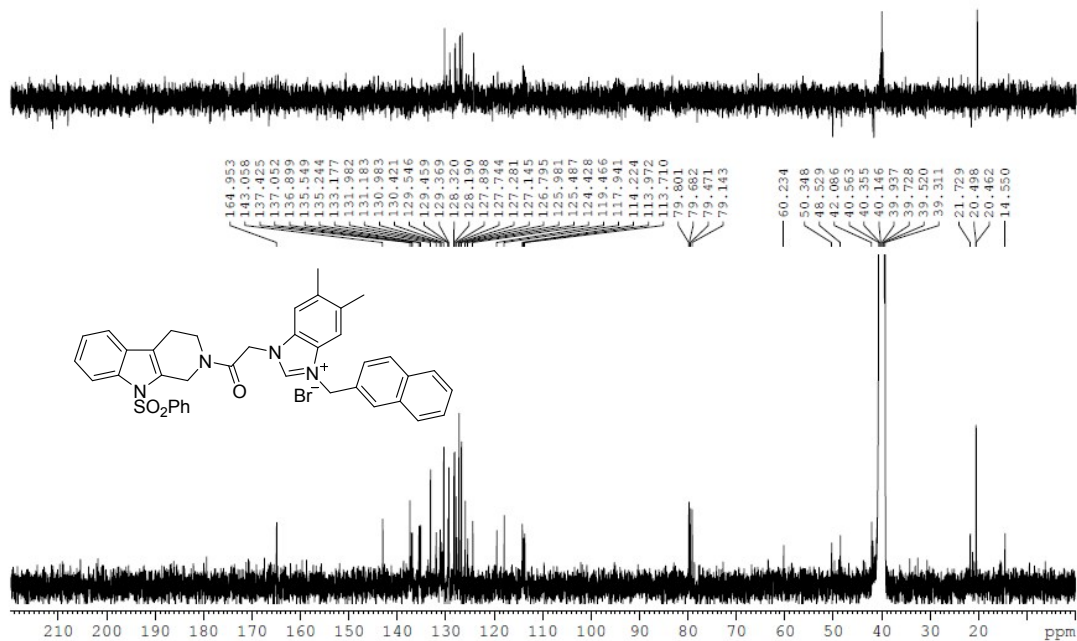

Supplement: c6ob01495j1.pdf [file c6ob01495j1.pdf]
